# Supplementary material for: Predictive value of machine learning on fracture risk in osteoporosis: a systematic review and meta-analysis
Source: PubMed Central journal article supplement — BMJ Open. 2023 Dec 8;13(12):e071430. doi: 10.1136/bmjopen-2022-071430 (PMC10728980; doi:10.1136/bmjopen-2022-071430), 2023-12-08

# BMJ Open

BMJ Open is committed to open peer review. As part of this commitment we make the peer review history of every article we publish publicly available.

When an article is published we post the peer reviewers' comments and the authors' responses online. We also post the versions of the paper that were used during peer review. These are the versions that the peer review comments apply to.

The versions of the paper that follow are the versions that were submitted during the peer review process. They are not the versions of record or the final published versions. They should not be cited or distributed as the published version of this manuscript.

BMJ Open is an open access journal and the full, final, typeset and author-corrected version of record of the manuscript is available on our site with no access controls, subscription charges or pay-per-view fees (<http://bmjopen.bmj.com>).

If you have any questions on BMJ Open's open peer review process please email [info.bmjopen@bmj.com](mailto:info.bmjopen@bmj.com)

# BMJ Open

## The predictive value of machine learning on fracture risk in osteoporosis: a systematic review and meta-analysis

|                               |                                                                                                                                                |
|-------------------------------|------------------------------------------------------------------------------------------------------------------------------------------------|
| Journal:                      | <i>BMJ Open</i>                                                                                                                                |
| Manuscript ID                 | bmjopen-2022-071430                                                                                                                            |
| Article Type:                 | Original research                                                                                                                              |
| Date Submitted by the Author: | 27-Dec-2022                                                                                                                                    |
| Complete List of Authors:     | Wu, Yanqian; Southeast University<br>Chao, Jianqian; Southeast University<br>Bao, Min; Southeast University<br>Zhang, Na; Southeast University |
| Keywords:                     | Public health < INFECTIOUS DISEASES, Epidemiology < ONCOLOGY, Bone diseases < ORTHOPAEDIC & TRAUMA SURGERY                                     |
|                               |                                                                                                                                                |

SCHOLARONE™  
Manuscripts

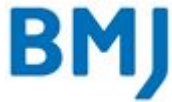

I, the Submitting Author has the right to grant and does grant on behalf of all authors of the Work (as defined in the below author licence), an exclusive licence and/or a non-exclusive licence for contributions from authors who are: i) UK Crown employees; ii) where BMJ has agreed a CC-BY licence shall apply, and/or iii) in accordance with the terms applicable for US Federal Government officers or employees acting as part of their official duties; on a worldwide, perpetual, irrevocable, royalty-free basis to BMJ Publishing Group Ltd ("BMJ") its licensees and where the relevant Journal is co-owned by BMJ to the co-owners of the Journal, to publish the Work in this journal and any other BMJ products and to exploit all rights, as set out in our [licence](#).

The Submitting Author accepts and understands that any supply made under these terms is made by BMJ to the Submitting Author unless you are acting as an employee on behalf of your employer or a postgraduate student of an affiliated institution which is paying any applicable article publishing charge ("APC") for Open Access articles. Where the Submitting Author wishes to make the Work available on an Open Access basis (and intends to pay the relevant APC), the terms of reuse of such Open Access shall be governed by a Creative Commons licence – details of these licences and which [Creative Commons](#) licence will apply to this Work are set out in our licence referred to above.

Other than as permitted in any relevant BMJ Author's Self Archiving Policies, I confirm this Work has not been accepted for publication elsewhere, is not being considered for publication elsewhere and does not duplicate material already published. I confirm all authors consent to publication of this Work and authorise the granting of this licence.

1  
2  
3  
4  
5  
6  
7  
8  
9  
10  
11  
12  
13  
14  
15  
16  
17  
18  
19  
20  
21  
22  
23  
24  
25  
26  
27  
28  
29  
30  
31  
32  
33  
34  
35  
36  
37  
38  
39  
40  
41  
42  
43  
44  
45  
46  
47  
48  
49  
50  
51  
52  
53  
54  
55  
56  
57  
58  
59  
60

## The predictive value of machine learning on fracture risk in osteoporosis: a systematic review and meta-analysis

Yanqian Wu<sup>1</sup>, Jianqian Chao<sup>1\*</sup>, Min Bao<sup>1</sup>, Na Zhang<sup>1</sup>

<sup>1</sup> Key Laboratory of Environmental Medicine Engineering of Ministry of Education, School of Public Health, Southeast University, Nanjing 210009, P.R. China

wyqmm0523@163.com (Yanqian Wu, PhD), chaoseu@163.com (Jianqian Chao, PhD),

1689586985@qq.com (Min Bao, PhD), 540923028@qq.com (Na Zhang, PhD)

\***Corresponding author:** Jianqian Chao, Key Laboratory of Environmental Medicine Engineering of Ministry of Education, School of Public Health, Southeast University, 87 Dingjiaqiao Road, Gulou District, Nanjing 210009, China.

Tel: +86 025 86424437/13813955976.

E-mail: chaoseu@163.com

**Word count** 3036.

## Abstract

**Objectives:** Early identification of fracture risk in osteoporosis patients is essential. In recent years, machine learning methods have been gradually introduced into this field; however, their predictive value remains controversial. Therefore, we conducted this systematic review and meta-analysis to explore the predictive value of machine learning on fracture risk in patients with osteoporosis.

**Setting:** Eligible studies were collected from four databases (PubMed, Embase, Cochrane Library and Web of Science) until June, 20<sup>th</sup>, 2022. A meta-analysis of the C-index was performed using random-effects models, while bivariate mixed-effects models were used for sensitivity and specificity. In addition, a subgroup analysis was performed according to the types of machine learning models and fracture sites.

**Participants:** Patients were diagnosed with osteoporosis, ML was applied to predict fracture risk and at least one measure of model performance (discrimination or calibration) was reported.

**Primary and secondary outcome measures:** Outcome variables were measured as C index or AUC, sensitivity(%), specificity(%).

**Results:** Forty-six studies were included in our meta-analysis, involving 8,869,283 patients, 89 prediction models specifically developed for osteoporosis populations, and 39 validation sets. These models' most commonly used predictors were age, fracture history, body mass index (BMI), bone mineral density (BMD), radiomics data, weight, height, bone mineral density T-score, history of falls, gender, and other chronic diseases. Overall, the C-index of machine learning was 0.76 (95% CI: 0.73,0.79) and 0.74 (95% CI: 0.71,0.77) in the training set and validation set, respectively; and the sensitivity was 0.81 (95% CI: 0.75,0.86) and 0.82 (95% CI: 0.75,0.87); and the specificity was 0.76 (95% CI: 0.80,0.81) and 0.83 (95% CI: 0.72,0.90), respectively.

**Conclusions:** Machine learning has an ideal predictive value on fracture risk in patients with osteoporosis and can be used as a potential tool for early identification of fracture risk in osteoporosis patients.

**Keywords** Osteoporosis Machine learning Fractures Meta-Analysis

### Strengths and limitations of this study

- Rigorous literature search and methodology followed to provide reliable estimates.
- We performed a quantitative synthesis to enhance the comparability of ML models.
- ML has an ideal predictive value for fracture risk in patients with osteoporosis.
- Most of the included studies (64%) had a high risk of bias.

### Introduction

Osteoporosis is a systemic metabolic bone disease characterized by decreased bone mass and degraded bone tissue microarchitecture, leading to an increased risk of bone fragility and fracture (WHO,1994)[1]. Osteoporosis features low quality of life, high cost, high disability rate and high morbidity rate[2]. It has become a global health problem that threatens human health. According to the World Health Organization, osteoporosis is the second-most serious health issue after cardiovascular diseases[3].

Machine learning (ML) is a subfield of artificial intelligence, which enables computers to "learn" through programs[4]. ML models have been applied in the field of osteoporosis and provided new opportunities for fracture prediction. A review by Ferizi et al. (2019) summarized relevant researches on the application of artificial intelligence to the prediction of osteoporosis. It drew a conclusion that new methods for automatic

1  
2  
3  
4  
5 image segmentation and fracture risk prediction showed promising clinical value[5]. A systematic review by  
6 Smets et al. (2021) reviewed the state-of-the-art ML methods and their application in osteoporosis diagnosis and  
7 fracture prediction[6]. Another review by Anam et al. (2021) explored the prediction of ML for osteoporosis in  
8 trabecular bone. This paper presented a detailed systematic review of ML prediction for trabecular bone diseases  
9 using magnetic resonance imaging (MRI) both from a methodology-driven and application perspective[7]. Most  
10 studies focused on the role of ML either to predict an indicator of osteoporosis, such as BMD or fractures, or as  
11 a tool for automatic segmentation of the images of patients at risk of osteoporosis, rather than predicting  
12 osteoporotic fractures.

13  
14  
15  
16 The present study evaluated the predictive value of ML for fracture risk in osteoporosis patients and  
17 provided an evidence-based medical basis for the application of ML in clinical practice.

### 18 **Materials and methods**

19  
20 This study was conducted in accordance with the Preferred Items of Systematic Review and Meta Analysis  
21 (PRISMA) statement (**Table S1**)[8]. The protocol was registered on the international prospective register of  
22 systematic reviews (PROSPERO) (Registration No. CRD42022346896). Relevant studies were retrieved from  
23 Pubmed, Embase, Cochrane Library, and Web of Science, and the retrieval was as of June 20, 2022. Two  
24 researchers independently searched the literature, the search strategy is shown in **Table S2**.

25  
26 Inclusion criteria were as follows: (1) patients were diagnosed with osteoporosis (OP); (2) ML was applied  
27 to predict fracture risk; (3) at least one measure of model performance (discrimination or calibration) was  
28 reported; (4) study population included adult patients older than 18 years, mainly including adults, the elderly  
29 and postmenopausal women. Exclusion criteria were as follows: (1) studies that only analyzed risk factors  
30 without building complete ML models; (2) studies that only included osteoporosis but did not mention fracture  
31 risk; (3) studies without available full text (or only abstract available) or data; (4) meta-analyses, reviews, case  
32 reports, editorial materials, letters, protocols, errata, and notes.

33  
34  
35  
36 Two researchers independently extracted data using standardized tables. Any studies excluded after  
37 full-text review have been recorded with reasons for their exclusion. The list of extracted items was based on the  
38 CHARMS checklist [9], and two data extraction sheets were prepared for developed and validated models.  
39 Finally, the extracted data involved the first author, year of publication, country, study design, data  
40 source, population group, gender, age, fracture sites, types of predictive models, number of predictors, and  
41 outcomes. The risk of bias was assessed using the Prediction Model Risk Of Bias Assessment Tool (PROBAST).  
42 The PROBAST contained a large number of questions in four distinct domains: participants, predictors,  
43 outcomes, and statistical analysis, reflecting the overall risk of bias and usability[10].

44  
45  
46  
47 A meta-analysis of the metrics (C-index and accuracy) was performed to evaluate ML models. If the  
48 C-index did not report 95% confidence intervals (CI) and standard errors, we estimated the standard errors in  
49 reference to the study by Debray TP et al.[11]. A C-index of 0.5 indicates that a model performs no better than  
50 chance; 0.6 to 0.7 is considered modest discrimination; 0.71 to 0.8 indicates very good discrimination; and  
51 greater than 0.8 is considered strong [12]. When there was a lack of accuracy in the original studies, we  
52 calculated it based on the sensitivity and specificity in combination with the number of samples in each  
53 subgroup and the number of modeling samples[11]. Considering the differences in variables, ML models and  
54 variation parameters included in the studies, the random effects model was preferred for the meta-analysis of  
55 C-index, and the bivariate mixed effects model was used for the meta-analysis of sensitivity and specificity. Our  
56  
57  
58  
59  
60

meta-analysis were performed using the software Stata 15.1 (Stata Corporation, College Station, TX, USA) and R4.2.0 (R Development Core Team, Vienna, <http://www.R-project.org>). A *p* value less than 0.05 was considered statistically significant.

## Results

A total of 6,851 studies (1395 from PubMed, 2644 from Embase Database, 157 from Cochrane Library, and 2655 from Web of Science) were searched from the databases. After removing duplicates and screening titles and abstracts, 340 articles remained. According to a full-text review, 46 articles [13-58] were eligible. Forty-four articles presented the development of one or more prediction models for osteoporotic fracture, and twenty-four articles described the validation of one or more models. The search process is shown in **Figure 1**.

Forty-six studies were ultimately included in our meta-analysis, involving 8,869,283 patients and 2,611,525 fracture cases. The majority of studies were conducted in U.S. (*n* = 10) and Canada (*n* = 6), and most studies were cohort studies (*n* = 40) or case-control studies (*n* = 6). The median age of osteoporosis patients was 69 years (ranging from 48.5 to 84). Most study samples covered postmenopausal women (*n* = 15). The fracture sites included hip fracture (*n* = 12), vertebral fracture (*n* = 11) and multi-site fracture (*n* = 23). Most studies were based on clinical hospital data (*n*=14), while some used questionnaire collection data (*n*=9), osteoporosis registry data (*n*=9), electronic health records (*n*=6), and administrative data (*n*=6). Only 11 articles elucidated the cross-validation method used by their models. The baseline characteristics are shown in **Table 1**.

A total of 89 prediction models were specifically developed for the osteoporosis population in 44 articles, and 39 validation sets were performed in 24 studies. For most of these models, the C-index or the area under the receiver operating characteristic curve (AUC) ranged from 0.58 to 0.98. **Table S3** shows all model-development and validation studies on the ML models for outcome prediction in patients with osteoporosis. The number of participants ranged from 28 to 6,329,986 (median 1026), and the number of fracture events varied from 14 to 2468694 (median 143). Among all the identified prediction models, the logistic regression (35%) was the most commonly studied model, followed by the survival model (17%).

**Table 1.** Characteristics of included studies in meta-analysis

| Author                | Year | Country     | Data source                   | Sample population type | Average age, years | Fracture site      | ML models                                       |
|-----------------------|------|-------------|-------------------------------|------------------------|--------------------|--------------------|-------------------------------------------------|
| Wu, Q[23]             | 2020 | USA         | gene database                 | older men              | 74.8               | multiple fractures | LR<br>ANN<br>RF<br>BT<br>LR<br>SVM<br>ANN<br>RF |
| Villamor, E[24]       | 2020 | Spain       | clinical hospital data        | postmenopausal women   | 81.4               | hip fracture       | SVM<br>ANN<br>RF                                |
| Van Geel, Tacm[25]    | 2011 | Netherlands | questionnaire collection data | postmenopausal women   | 62                 | vertebral fracture | SM                                              |
| Ulivieri, F. M[26]    | 2021 | Italy       | clinical hospital data        | patient                | 48.5               | vertebral fracture | ANN                                             |
| Yoda, T[27]           | 2021 | Japan       | clinical hospital data        | patient                | 77.6               | vertebral fracture | CNN                                             |
| Jiang, X. Z[28]       | 2013 | USA         | clinical hospital data        | older women            | 61.4               | multiple fractures | LR                                              |
| Schousboe, J. T[29]   | 2014 | USA         | clinical hospital data        | older women            | 75                 | vertebral fracture | LR                                              |
| Sandhu, S. K[30]      | 2010 | Australia   | electronic health record data | patient                | 74                 | multiple fractures | LR                                              |
| Rubin, K. H[31]       | 2018 | Denmark     | administrative data           | inhabitant             | 61.4               | multiple fractures | LR                                              |
| Pluskiewicz, W[32]    | 2010 | Poland      | osteoporosis registry data    | postmenopausal women   | 68.5               | multiple fractures | LR                                              |
| Jang, E. J[33]        | 2016 | Korea       | questionnaire collection data | inhabitant             | 61                 | multiple fractures | LR                                              |
| Barret A. Monchka[34] | 2021 | Canada      | osteoporosis registry data    | inhabitant             | 75                 | vertebral fracture | CNN                                             |
| Mehta, S. D[35]       | 2020 | USA         | clinical hospital data        | patient                | 69                 | vertebral fracture | SVM                                             |
| Langsetmo, L[36]      | 2011 | Canada      | questionnaire collection data | inhabitant             | 67.6               | multiple fractures | SM                                              |
| Ioannidis, G[37]      | 2017 | Canada      | electronic health record data | elderly                | 61                 | multiple fractures | DT<br>LR                                        |
| K. K. Nishiyama[38]   | 2013 | Canada      | questionnaire collection data | postmenopausal women   | 73                 | multiple fractures | SVM                                             |
| Kruse, C[39]          | 2017 | Denmark     | administrative data           | inhabitant             | 60.8               | hip fracture       | DT<br>NB                                        |
| Kolanu, N[40]         | 2021 | Australia   | electronic health record data | patient                | 73.4               | multiple fractures | ANN                                             |
| Kim, H. Y[41]         | 2016 | Korea       | administrative data           | inhabitant             | 60                 | multiple fractures | SM                                              |
| Hsieh, C. I[42]       | 2021 | China       | clinical hospital data        | patient                | 72.2               | hip fracture       | LR                                              |
| Hong, N[43]           | 2021 | Korea       | clinical hospital data        | older women            | 73                 | hip fracture       | SM<br>BT<br>SVM<br>ANN<br>LR<br>KNN<br>SVM      |
| Ho-Le, T. P[44]       | 2017 | Australia   | osteoporosis registry data    | postmenopausal women   | 69.1               | hip fracture       | LR<br>KNN<br>SVM                                |
| Henry, M. J[45]       | 2011 | Australia   | osteoporosis registry data    | older women            | 74                 | multiple fractures | LR                                              |
| Galassi, A[46]        | 2020 | Spain       | electronic health record data | postmenopausal women   | 81.4               | hip fracture       | DT<br>LR<br>RF<br>SVM                           |
| FitzGerald, G[47]     | 2014 | California  | questionnaire collection data | postmenopausal women   | 67                 | multiple fractures | SM                                              |
| Ferizi, U[48]         | 2019 | USA         | osteoporosis registry data    | postmenopausal women   | 62                 | multiple fractures | LR                                              |



|                        |      |                 |                               |                      |      |                    |                                          |
|------------------------|------|-----------------|-------------------------------|----------------------|------|--------------------|------------------------------------------|
| Enns-Bray, W. S[49]    | 2019 | USA             | clinical hospital data        | older women          | 77.2 | hip fracture       | LR                                       |
| Engels, A[50]          | 2020 | Germany         | administrative data           | patient              | 75.6 | hip fracture       | SVM<br>RF<br>LR<br>BT<br>ANN<br>RF<br>SM |
| De Vries, B. C. S[51]  | 2021 | The Netherlands | clinical hospital data        | patient              | 68   | multiple fractures |                                          |
| Cheung, E. Y[52]       | 2012 | China           | electronic health record data | postmenopausal women | 62   | multiple fractures | SM                                       |
| Chanplakorn, P[53]     | 2021 | Thailand        | osteoporosis registry data    | postmenopausal women | 68.5 | vertebral fracture | SM                                       |
| Bredbenner, T. L[54]   | 2014 | USA             | clinical hospital data        | older men            | 65   | hip fracture       | LR                                       |
| Beyaz, S[55]           | 2020 | Turkey          | osteoporosis registry data    | patient              | 74.9 | multiple fractures | ANN                                      |
| Berry, S. D[56]        | 2018 | USA             | administrative data           | inhabitant           | 84   | hip fracture       | SM                                       |
| Beaudoin, C[57]        | 2021 | Canada          | administrative data           | elderly              | 75.1 | multiple fractures | SM                                       |
| Baleanu, F[58]         | 2022 | Belgium         | clinical hospital data        | postmenopausal women | 70.1 | multiple fractures | LR                                       |
| Almog, Y. A[59]        | 2020 | USA             | electronic health record data | patient              | 50   | vertebral fracture | ANN                                      |
| Zagorski, P[60]        | 2021 | Poland          | questionnaire collection data | postmenopausal women | 65.2 | hip fracture       | LR                                       |
| Diez-Perez, A[61]      | 2007 | Spain           | questionnaire collection data | postmenopausal women | 72.3 | multiple fractures | SM                                       |
| Lix, L. M[62]          | 2018 | Canada          | osteoporosis registry data    | older women          | 65.6 | multiple fractures | LR                                       |
| Li, Q. J[63]           | 2021 | China           | clinical hospital data        | patient              | 70   | multiple fractures | LR                                       |
| Lee, S[64]             | 2008 | Korea           | osteoporosis registry data    | older women          | 65   | multiple fractures | SVM                                      |
| Jacobs, J. W. G[65]    | 2010 | Portugal        | questionnaire collection data | inhabitant           | 66   | vertebral fracture | LR                                       |
| Eller-Vainicher, C[66] | 2011 | Italy           | questionnaire collection data | postmenopausal women | 68   | vertebral fracture | ANN<br>LR                                |
| Zhong, B. Y[67]        | 2017 | China           | clinical hospital data        | patient              | 72   | vertebral fracture | SM                                       |
| Xiao, X[68]            | 2021 | USA             | gene database                 | postmenopausal women | 64.5 | hip fracture       | SM                                       |

\*LR: Logistic Regression;ANN:artificial neural network;SVM = support-vector machine; CNN = convolutional neural network; kNN = k-nearest neighbors; RF = random forests;DT=decision tree;NB=Naive Bayes;BT=Boosted tree;SM=Survival model;AUC=area under the receiver operating characteristic curve;ROC=receiver operating characteristic;PPV=positive predictive value;NPV=negative predictive value.

We roughly classified the fracture risk predictors into seven types: demographics/fracture history, physical examination, lifestyle, comorbidity, drug and nutrient intake, radiomics, and mental state. The classification of fracture risk predictors is presented in **Table 2**. The most commonly used predictors in these models were age (n=59), past fracture history (n=32), body mass index (BMI) (n=31), bone mineral density (BMD) (n=25), radiomics data (n=23), weight (n=23), height (n=21), bone mineral density T-score (n=20), history of falls (n=22), gender (n=17) and other chronic diseases (n=12).

**Table 2.** Main sorts of predictors included in 89 developed models for osteoporosis patients

| Predictors                               | Number of models |
|------------------------------------------|------------------|
| <b>Demographics and fracture history</b> |                  |
| Age                                      | 59               |
| History of falls                         | 22               |
| Past fracture history                    | 32               |
| Sex                                      | 17               |
| Women's menopause age                    | 6                |
| Genetic risk score (GRS)                 | 5                |
| <b>Physical examination</b>              |                  |
| Body mass index, BMI                     | 31               |
| Bone mineral density, BMD                | 25               |
| Weight                                   | 23               |
| Height                                   | 21               |
| Bone mineral density t-score             | 20               |
| Grip                                     | 1                |
| Transfer ability                         | 1                |
| <b>Lifestyle</b>                         |                  |
| Alcohol consumption                      | 7                |
| Smoking                                  | 6                |
| Physical activity index                  | 4                |
| Frequent sun exposure                    | 3                |
| Lack of physical exercise                | 1                |
| Vagrant event                            | 1                |
| <b>Comorbidity</b>                       |                  |
| Other chronic diseases                   | 12               |
| Osteoporosis                             | 8                |
| Rheumatoid arthritis                     | 6                |
| Fracture type                            | 4                |
| Backache                                 | 2                |
| <b>Drug and nutrient intake</b>          |                  |
| Use of hormonal drugs                    | 6                |

|                     |                       |    |
|---------------------|-----------------------|----|
|                     | Calcium intake        | 3  |
|                     | Intake of other drugs | 2  |
| <b>Radiomics</b>    |                       |    |
|                     | Radiomic data         | 23 |
| <b>Mental state</b> |                       |    |
|                     | Cognitive performance | 3  |
|                     | Anxiety/depression    | 2  |

The risk of bias assessment of the model-development studies is summarized in **Figure 2**. More than half of these studies had a high risk of bias (n=48; 64%). The risk of bias in most studies was low in terms of participants, predictors and outcome. However, a high or unclear risk of bias in the statistical analysis was observed in all model development and validation studies. More details are shown in **Table S4**.

Thirty-nine studies involving 89 models were included in the meta-analysis of the C-index. Since substantial heterogeneity was present, we performed subgroup analyses based on fracture site and model type. **Table 3** shows the results of the meta-analysis of C-index for ML models in patients with osteoporosis. The forest plot of C-index is presented in **Figure 3**. The pooled C-index was 0.76 (95 % CI: 0.73, 0.79) ( $I^2 = 99.8\%$ ,  $P < 0.001$ ) in the training set and 0.74 (95 % CI: 0.71, 0.77) ( $I^2 = 99.8\%$ ,  $P < 0.001$ ) in the validation set. In the training set, Naive Bayes showed the highest predictive performance (pooled C-index = 0.92), followed by artificial neural network (pooled C-index = 0.82), decision trees (pooled C-index = 0.78) and logistic regression (pooled C-index = 0.77). Furthermore, models for vertebral fracture (pooled C-index = 0.79) and hip fracture (pooled C-index = 0.78) performed better than those for multi-site fracture (pooled C-index = 0.72). However, in the validation set, logistic regression (pooled C-index = 0.82) showed the best performance, closely followed by support vector machines (pooled C-index = 0.78), artificial neural network (pooled C-index = 0.73) and boosted tree (pooled c-index = 0.70). Models for vertebral fracture (pooled C-index = 0.84) performed better than those for hip fracture (pooled C-index = 0.73) and multi-site fracture (pooled C-index = 0.71). Across these studies, we extracted 53 estimates of balanced accuracy (the average of the reported sensitivity and specificity), ranging from 0.66 to 1.00. As presented in **Table 4**, the mean sensitivity and specificity of models in the training set were 0.81 (95 % CI: 0.75, 0.86) ( $I^2 = 99.0\%$ ,  $P < 0.001$ ) and 0.82 (95 % CI: 0.75, 0.87) ( $I^2 = 99.9\%$ ,  $P < 0.001$ ), respectively. Moreover, the mean sensitivity and specificity of models in the validation set were 0.76 (95 % CI: 0.80, 0.81) ( $I^2 = 98.9\%$ ,  $P < 0.001$ ) and 0.83 (95 % CI: 0.72, 0.90) ( $I^2 = 99.9\%$ ,  $P < 0.001$ ), respectively.

**Table 3.** Results of meta-analysis of C-index statistics for subgroup analysis by fracture site and machine learning type

| subgroup             | Training dataset |                        | Validation dataset |                        |
|----------------------|------------------|------------------------|--------------------|------------------------|
|                      | N                | C-statistic(95% CI)    | N                  | C-statistic(95% CI)    |
| <b>Fracture site</b> |                  |                        |                    |                        |
| Vertebral fracture   | 13               | 0.79(0.74,0.85)        | 5                  | 0.84(0.67,1.00)        |
| Hip fracture         | 20               | 0.78(0.73,0.84)        | 9                  | 0.73(0.65,0.81)        |
| Multi-site fracture  | 26               | 0.72(0.70,0.74)        | 16                 | 0.71(0.65,0.77)        |
| <b>Model type</b>    |                  |                        |                    |                        |
| LR                   | 27               | 0.77(0.72,0.82)        | 8                  | 0.82(0.75,0.88)        |
| ANN                  | 6                | 0.82(0.74,0.90)        | 4                  | 0.73(0.56,0.91)        |
| RF                   | 3                | 0.70(0.68,0.72)        | 3                  | 0.66(0.59,0.73)        |
| SVM                  | 4                | 0.76(0.61,0.91)        | 3                  | 0.78(0.59,0.96)        |
| DT                   | 2                | 0.78(0.56,0.99)        | 1                  | 0.69(0.67,0.70)        |
| NB                   | 1                | 0.92(0.90,0.95)        | -                  |                        |
| Survival model       | 11               | 0.69(0.67,0.71)        | 8                  | 0.68(0.67,0.69)        |
| Boosted tree         | 5                | 0.73(0.71,0.74)        | 3                  | 0.70(0.69,0.71)        |
| <b>Overall</b>       | <b>59</b>        | <b>0.76(0.73,0.79)</b> | <b>30</b>          | <b>0.74(0.71,0.77)</b> |

**Table 4.** Results of sensitivity and specificity subgroup analysis by fracture site and machine learning type

| subgroup             | Training dataset |                     |                     | Validation dataset |                     |                     |
|----------------------|------------------|---------------------|---------------------|--------------------|---------------------|---------------------|
|                      | N                | Sensitivity(95% CI) | Specificity(95% CI) | N                  | Sensitivity(95% CI) | Specificity(95% CI) |
| <b>Fracture site</b> |                  |                     |                     |                    |                     |                     |
| Vertebral fracture   | 9                | 0.73(0.59,0.83)     | 0.92(0.86,0.95)     | 4                  | 0.87(0.70,0.95)     | 0.97(0.94,0.98)     |
| Hip fracture         | 13               | 0.90 (0.82,0.94)    | 0.82(0.75,0.88)     | 6                  | 0.84 (0.77,0.89)    | 0.85(0.80,0.89)     |
| Multi-site fracture  | 15               | 0.76(0.65,0.84)     | 0.72(0.57,0.83)     | 8                  | 0.66 (0.61,0.70)    | 0.69(0.53,0.81)     |
| <b>Model type</b>    |                  |                     |                     |                    |                     |                     |
| LR                   | 18               | 0.72(0.64,0.78)     | 0.77(0.69,0.84)     | 6                  | 0.74(0.64,0.83)     | 0.80(0.59,0.92)     |
| ANN                  | 7                | 0.89(0.77,0.95)     | 0.92(0.81,0.97)     | 4                  | 0.82(0.69,0.90)     | 0.89(0.78,0.95)     |

|         |                |    |                 |                 |    |                 |                 |
|---------|----------------|----|-----------------|-----------------|----|-----------------|-----------------|
|         | RF             | 1  | 0.84            | 0.91            | 1  | 0.70            | 0.47            |
|         | SVM            | 5  | 0.86(0.72,0.94) | 0.84(0.61,0.95) | 3  | 0.79(0.72,0.85) | 0.89(0.79,0.94) |
|         | DT             | 2  | 0.97(0.53,1.00) | 0.70(0.67,0.73) | -  |                 |                 |
|         | NB             | 1  | 0.88            | 0.81            | -  |                 |                 |
|         | kNN            | 1  | 1.00            | 0.83            | 1  | 0.81            | 0.79            |
|         | Survival model | 1  | 0.81            | 0.52            | -  |                 |                 |
|         | Boosted tree   | 1  | 0.59            | 0.67            | 1  | 0.70            | 0.95            |
| Overall |                | 37 | 0.81(0.75,0.86) | 0.82(0.75,0.87) | 16 | 0.76(0.80,0.81) | 0.83(0.72,0.90) |

## Discussion

The present systematic review provides an overview of all currently available fracture risk prediction models developed or validated in the osteoporosis population to assess the overall ML models for fracture risk. The most commonly used predictors in these models are age, gender, weight, height, BMI, past fracture history, BMD, radiomics data, bone mineral density T-score, history of falls, and other chronic diseases. In general, most predictors included in model-development studies are traditional risk factors. A recent study showed that the most common risk factors for fragility fractures contained decreased bone mineral density, age, gender, low BMI, history of fragility fractures, family history of hip fractures, history of glucocorticoid therapy, smoking, excessive alcohol consumption, lack of vitamin D, early menopause and immobility[59]. This is consistent with some of the common fracture predictors identified in our study. Our study also finds that radiomics data are frequently used as fracture predictors in ML models for osteoporosis. A retrospective, single-center, preliminary investigation by Lim et al. reported that the predictive performance of ML analysis with radiomics features and Abdomen-pelvic CT to diagnose osteoporosis showed high validity with more than 93% accuracy, specificity, and negative predictive value[60].

In terms of the models in the training sets, Naive Bayes performs best (pooled C-index = 0.92), followed by artificial neural network(ANN), decision trees, and logistic regression. As Naive Bayesian algorithm is not affected by missing data and requires less training data set, it is widely used in the medical field as one of the most effective learning algorithms in data mining[61]. The Naive Bayes algorithm can be used to analyze a large number of unknown data. Bayesian models are the statistical method of choice when resource settings are low, especially when sample size and budget are limited[62]. Additionally, ANN is widely used in radiation, urology, inspection, and cardiovascular fields. With its computer processing techniques, ANN can assist in diagnosing various diseases and provide guidance for clinical medication[63-64].

In the validation sets, logistic regression (pooled C-index = 0.82) performed best, closely followed by support vector machines (SVM), ANN and boosted tree. Possibly because logistic regression is very efficient and easy to implement, it's easy to understand, and it outputs calibrated predicted probabilities. An article on prediction models for the outcomes in patients with chronic obstructive pulmonary disease also revealed that logistic regression (n=111; 72%) was the most frequently used modeling method[65]. This is the same as recent findings reported by Kushan et al.[66], their ML models with logistic regression outperformed those with

1  
2  
3  
4  
5 random forest and decision trees. Moreover, SVM adapts well to small samples and high-dimensional data with  
6 a low misclassification rate, and therefore can be used for classification and regression analysis[67].

7  
8 Most included studies reported multiple metrics, such as sensitivity, specificity, AUC and ROC. The mean  
9 sensitivity and specificity of the models in the training set model were 0.81 (95 % CI: 0.75, 0.86) and 0.82 (95  
10 % CI: 0.75, 0.87), respectively, greater than that of the models in the validation set. Therefore, fracture risk  
11 prediction using ML models still has promotion space in external validation. However, a single performance  
12 metric such as AUC or ROC is insufficient to recommend the application of ML models into clinical practice[6],  
13 and it is necessary to combine other multiple metrics.  
14

15  
16 This systematic review and meta-analysis summarized a large number of studies to comprehensively  
17 evaluate the predictive value of ML on fracture risk in patients with osteoporosis. It elucidated the  
18 characteristics of the established models and validation studies on existing models. We performed a quantitative  
19 synthesis that was never done in previous studies, enhancing the comparability of these models. Furthermore,  
20 only the C-index was reported in most predictive models[65,68], but our study used bivariate mixed-effects  
21 models for sensitivity and specificity analyses. In the training dataset, sensitivity of hip fracture (pooled  
22 C-index = 0.90), performed best, closely followed by multi-site fracture, vertebral fracture. For patients  
23 with hip fractures, missed and misdiagnosed radiographs can lead to poor prognosis[69]. ML models have been  
24 increasingly used to identify hip fracture risk with high accuracy[29]. ML has a stronger ability to recognize  
25 images and can provide a diagnostic scheme with high accuracy for inexperienced physicians to refer to.  
26

27  
28 Some limitations still need to be considered in the present study. The risk of bias assessment  
29 demonstrated that most studies ( 64% ) had a high risk of bias, whether they involved the development or  
30 external validation of a prediction model for the osteoporosis population. The main bias came from the analysis,  
31 because most studies did not properly handle continuous and categorical variables and reported no method for  
32 processing missing values. Only two articles reported the use of median imputation to deal with missing  
33 values[13,29], while others did not mention how to deal with missing values. These shortcomings in the  
34 methodological quality may be due to a lack of guidelines for the standard reporting of risk prediction studies at  
35 that time. In addition, some models were reported with little information that was insufficient for external  
36 validation by other researchers, let alone to be implemented in clinical practice. For example, only 11 articles  
37 used the K-fold cross-validation method to improve the accuracy of their  
38 algorithms[13,14,17,25,28,29,32,34,40,44,45], but most of the eligible articles did not. Models without stringent  
39 validation offer limited applicability[66]. Furthermore, we observed large between study heterogeneity in the  
40 meta-analyses of C statistics. Potential sources of heterogeneity could be the differences in patients's  
41 characteristics, data sources and analysis methods across the validation studies. More than 30% of the research  
42 data in included studies came from clinical studies, and clinical data are heterogeneous and usually imbalanced.  
43 At last, most ML models did not report balanced accuracy, lack calibration or external validation or decision  
44 curves that the generalization of the models need to be further verified, so we suggest that subsequent research  
45 can be further refined.  
46

47  
48 Although our findings lack some evidence due to the limitations mentioned above, the present study can  
49 still provide meaningful recommendations for future research and practice. First, as existing ML models for  
50 fracture prediction focus on populations in Western countries, more external validation studies on other  
51  
52  
53  
54

55  
56 Although our findings lack some evidence due to the limitations mentioned above, the present study can  
57 still provide meaningful recommendations for future research and practice. First, as existing ML models for  
58 fracture prediction focus on populations in Western countries, more external validation studies on other  
59  
60

1  
2  
3  
4  
5 populations are needed to widen their application. Second, ML models can identify valuable evidence to support  
6 clinicians in making more accurate judgments in highly complex decision-making processes and have certain  
7 clinical application value[67]. Future researches need to be more rigorous, robust, and comprehensive when  
8 assessing the quality of its clinical application and impact on clinicians and patients. Third, the advances in  
9 emerging technologies such as ML have opened a new era of clinical medical research, providing new directions  
10 for solving intricate problems with classical statistical methods. However, clinicians currently are not skillful in  
11 using such emerging technologies. Therefore, clinicians should be encouraged to improve their ability to use  
12 ML so that medical research can become more accurate with the help of ML.

13  
14  
15  
16 In conclusion, ML has an ideal predictive value for fracture risk in patients with osteoporosis and can be  
17 used as a potential tool for early identification of fracture risk in patients with osteoporosis. Therefore, in the  
18 future, we can try to construct multi-racial cases, including machine learning of predictors of living habits,  
19 eating habits and social background, and then rely on machine learning to develop simple risk assessment tools  
20 adapted to multiple races.

## 21 22 23 **Declarations**

### 24 25 26 ***Funding***

27  
28 This work was supported by National Natural Science Foundation of China (81872711), 2022 Jiangsu  
29 University Philosophy and Social Science Research Major Project (2022SJZD141).

### 30 31 32 33 ***Authors Contributions***

34 Yanqian Wu and Jianqian Chao designed the review, developed the inclusion criteria, screened titles and  
35 abstracts, appraised the quality of included papers, and drafted the manuscript. Min Bao and Na Zhang collected  
36 and cleaned the data, also analysed the data. All authors critically reviewed drafts and approved the final  
37 manuscript.

### 38 39 40 41 ***Competing interests***

42  
43 Yanqian Wu, Jianqian Chao, Min Bao and Na Zhang declare that they have no conflict of interest.

### 44 45 46 47 ***Ethical Approval***

48 This study does not involve human participants and ethical approval was not required.

### 49 50 51 52 ***Patient and Public Involvement***

53 No patient involved.

### 54 55 56 57 ***Data sharing statement***

58 The data generated during this study are not publicly available, but a de-identified analytical file is available  
59 from the corresponding author on reasonable request.

## References

1. Kanis, JA (1994) Assessment of fracture risk and its application to screening for postmenopausal osteoporosis: synopsis of a WHO report. *Osteoporosis international* 4:368-381. <https://doi.org/10.1007/BF01622200>
2. Veronese N, Kolk H, Maggi S(2020) Epidemiology of Fragility Fractures and Social Impact. In: Falaschi P, Marsh D, editors. *Orthogeriatrics: The Management of Older Patients with Fragility Fractures* [Internet]. 2nd ed. Cham (CH): Springer,2021. Chapter 2. [https://doi.org/10.1007/978-3-030-48126-1\\_2](https://doi.org/10.1007/978-3-030-48126-1_2)
3. Piscitelli P, Feola M, Rao C, Celi M, Gasbarra E, Neglia C, Quarta G, Liuni FM, Parri S, Iolascon G, Brandi ML, Distante A, Tarantino U (2014) Ten years of hip fractures in Italy: For the first time a decreasing trend in elderly women. *World J Orthop* 18;5(3):386-91. <https://doi: 10.5312/wjo.v5.i3.386>.
4. Battina D S (2019) Artificial Intelligence in Software Test Automation: A Systematic Literature Review. *International Journal of Emerging Technologies and Innovative Research* (www. jetir. org| UGC and issn Approved) ISSN 2349-5162. <https://doi.org/ 10.2196/26448>
5. Ferizi U, Honig S, Chang G (2019) Artificial intelligence, osteoporosis and fragility fractures. *Current opinion in rheumatology* 31(4): 368. <https://doi.org/ 10.1097/BOR.0000000000000607>
6. Smets J, Shevroja E, Hügle T, Leslie WD, Hans D (2021) Machine learning solutions for osteoporosis—a review. *Journal of Bone and Mineral Research* 36(5): 833-851. <https://doi.org/ 10.1002/jbmr.4292>
7. Anam M, Hussain M, Nadeem M W et al (2021) Osteoporosis prediction for trabecular bone using machine learning: a review. *Computers, Materials & Continua (CMC)* 67(1). <https://doi.org/ 10.32604/cmc.2021.013159>
8. Liberati A, Altman D G, Tetzlaff J et al (2009) The PRISMA statement for reporting systematic reviews and meta-analyses of studies that evaluate health care interventions: explanation and elaboration. *J Clin Epidemiol* 62(10): e1-34. <https://doi.org/ 10.1371/journal.pmed.1000100>
9. Palazón - Bru A, Martín - Pérez F, Mares - García E et al (2020) A general presentation on how to carry out a CHARMS analysis for prognostic multivariate models. *Statistics in Medicine* 39(23): 3207-3225. <https://doi.org/ 10.1002/sim.8660>
10. Nagendran M, Chen Y, Lovejoy C A et al (2020) Artificial intelligence versus clinicians: systematic review of design, reporting standards, and claims of deep learning studies. *BMJ* 368. <https://doi.org/ 10.1136/bmj.m689>
11. Debray T P A, Damen J A A G, Riley R D et al (2019) A framework for meta-analysis of prediction model studies with binary and time-to-event outcomes. *Statistical methods in medical research* 28(9): 2768-2786. <https://doi.org/ 10.1177/0962280218785504>
12. Snell KI, Ensor J, Debray TP, Moons KG, Riley RD (2018) Meta-analysis of prediction model performance across multiple studies: Which scale helps ensure between-study normality for the C-statistic and calibration measures? *Stat Methods Med Res* 27:3505-22. <https://doi.org/10.1177/0962280217705678>
13. Wu Q, Nasoz F, Jung J, Bhattarai B, Han MV (2020) Machine learning approaches for fracture risk assessment: a comparative analysis of genomic and phenotypic data in 5130 older men. *Calcified tissue international* 107(4): 353-361. <https://doi.org/10.1007/s00223-020-00734-y>
14. Villamor E, Monserrat C, Del Río L, Romero-Martín JA, Rupérez MJ (2020) Prediction of osteoporotic hip fracture in postmenopausal women through patient-specific FE analyses and machine learning. *Computer Methods and Programs in Biomedicine* 193: 105484. <https://doi.org/10.1016/j.cmpb.2020.105484>



- 1
- 2
- 3
- 4
- 5 15. Van Geel T A C M, Nguyen N D, Geusens P P et al (2011) Development of a simple prognostic nomogram for
- 6 individualising 5-year and 10-year absolute risks of fracture: a population-based prospective study among
- 7 postmenopausal women. *Annals of the rheumatic diseases* 70(1): 92-97. [https://doi.org/ 10.1136/ard.2010.131813](https://doi.org/10.1136/ard.2010.131813)
- 8
- 9 16. Olivieri F M, Rinaudo L, Piodi L P et al (2021) Bone strain index as a predictor of further vertebral fracture in
- 10 osteoporotic women: An artificial intelligence-based analysis. *Plos one* 16(2): e0245967.[https://doi.org/](https://doi.org/10.1371/journal.pone.0245967)
- 11 10.1371/journal.pone.0245967
- 12
- 13 17. Yoda T, Maki S, Furuya T et al (2022) Automated Differentiation Between Osteoporotic Vertebral Fracture and
- 14 Malignant Vertebral Fracture on MRI Using a Deep Convolutional Neural Network. *Spine* 47(8):
- 15 E347-E352.[https://doi.org/ 10.1097/BRS.0000000000004307](https://doi.org/10.1097/BRS.0000000000004307)
- 16
- 17 18. Jiang X, Westermann LB, Galleo GV, Demko J, Marakovits KA, Schnatz PF (2013) Age as a predictor of osteoporotic
- 18 fracture compared with current risk-prediction models. *Obstetrics & Gynecology* 122(5): 1040-1046.[https://doi.org/](https://doi.org/10.1097/AOG.0b013e3182a7e29b)
- 19 10.1097/AOG.0b013e3182a7e29b
- 20
- 21 19. Schousboe JT, Rosen HR, Vokes TJ et al (2014) Prediction models of prevalent radiographic vertebral fractures among
- 22 older women. *Journal of Clinical Densitometry* 17(3): 378-385.[https://doi.org/ 10.1016/j.jocd.2013.09.021](https://doi.org/10.1016/j.jocd.2013.09.021). Epub 2014
- 23 Feb 25
- 24
- 25 20. Sandhu S K, Nguyen N D, Center J R et al (2010) Prognosis of fracture: evaluation of predictive accuracy of the
- 26 FRAX™ algorithm and Garvan nomogram. *Osteoporosis international* 21(5): 863-871.[https://doi.org/](https://doi.org/10.1007/s00198-009-1026-7)
- 27 10.1007/s00198-009-1026-7. Epub 2009 Jul 25
- 28
- 29 21. Rubin K H, Möller S, Holmberg T, Bliddal M, Søndergaard J, Abrahamsen B (2018) A new fracture risk assessment
- 30 tool (FREM) based on public health registries. *Journal of bone and mineral research* 33(11): 1967-1979.[https://doi.org/](https://doi.org/10.1002/jbmr.3528)
- 31 10.1002/jbmr.3528
- 32
- 33 22. Pluskiewicz W, Adameczyk P, Franek E et al (2010) Ten-year probability of osteoporotic fracture in 2012 Polish
- 34 women assessed by FRAX and nomogram by Nguyen et al.—Conformity between methods and their clinical utility.
- 35 *Bone* 46(6): 1661-1667.[https://doi.org/ 10.1016/j.bone.2010.02.012](https://doi.org/10.1016/j.bone.2010.02.012)
- 36
- 37 23. Jang E J, Lee Y K, Choi H J et al (2016) Osteoporotic fracture risk assessment using bone mineral density in Korean: a
- 38 community-based cohort study[J]. *Journal of bone metabolism* 23(1): 34-39.[https://doi.org/ 10.11005/jbm.2016.23.1.34](https://doi.org/10.11005/jbm.2016.23.1.34).
- 39 Epub 2016 Feb 29
- 40
- 41 24. Monchka B A, Kimelman D, Lix L M et al (2021) Feasibility of a generalized convolutional neural network for
- 42 automated identification of vertebral compression fractures: The Manitoba Bone Mineral Density Registry. *Bone* 150:
- 43 116017.[https://doi.org/ 10.1016/j.bone.2021.116017](https://doi.org/10.1016/j.bone.2021.116017)
- 44
- 45 25. Mehta S D, Sebro R (2020) Computer-aided detection of incidental lumbar spine fractures from routine dual-energy
- 46 X-ray absorptiometry (DEXA) studies using a support vector machine (SVM) classifier. *Journal of Digital Imaging*
- 47 33(1): 204-210.[https://doi.org/ 10.1007/s10278-019-00224-0](https://doi.org/10.1007/s10278-019-00224-0)
- 48
- 49 26. Langsetmo L, Nguyen T V, Nguyen N D et al (2011) Independent external validation of nomograms for predicting risk
- 50 of low-trauma fracture and hip fracture. *CMAJ* 183(2): E107-E114.[https://doi.org/ 10.1503/cmaj.100458](https://doi.org/10.1503/cmaj.100458). Epub 2010
- 51 Dec 20
- 52
- 53 27. Ioannidis G, Jantzi M, Bucek J et al (2017) Development and validation of the Fracture Risk Scale (FRS) that predicts
- 54 fracture over a 1-year time period in institutionalised frail older people living in Canada: an electronic record-linked
- 55 longitudinal cohort study. *BMJ open* 7(9): e016477.[https://doi.org/ 10.1136/bmjopen-2017-016477](https://doi.org/10.1136/bmjopen-2017-016477)
- 56
- 57
- 58
- 59
- 60

- 1
- 2
- 3
- 4
- 5 28. Nishiyama K K, Macdonald H M, Hanley D A et al (2013) Women with previous fragility fractures can be classified
- 6 based on bone microarchitecture and finite element analysis measured with HR-pQCT[J]. *Osteoporosis International*,
- 7 2013, 24(5): 1733-1740. [https://doi.org/ 10.1007/s00198-012-2160-1](https://doi.org/10.1007/s00198-012-2160-1)
- 8
- 9 29. Kruse C, Eiken P, Vestergaard P (2017) Machine learning principles can improve hip fracture prediction[J]. *Calcified*
- 10 *tissue international* 100(4): 348-360. [https://doi.org/ 10.1007/s00223-017-0238-7](https://doi.org/10.1007/s00223-017-0238-7)
- 11
- 12 30. Kolanu N, Brown A S, Beech A et al (2021) Natural language processing of radiology reports for the identification of
- 13 patients with fracture. *Archives of Osteoporosis* 16(1): 1-8. [https://doi.org/ 10.1007/s11657-020-00859-5](https://doi.org/10.1007/s11657-020-00859-5)
- 14
- 15 31. Kim H Y, Jang E J, Park B J, Kim TY, Shin SA, Ha YC, Jang SI (2016) Development of a Korean Fracture Risk Score
- 16 (KFRS) for predicting osteoporotic fracture risk: analysis of data from the Korean National Health Insurance Service.
- 17 *PLoS One* 11(7): e0158918. [https://doi.org/ 10.1371/journal.pone.0158918](https://doi.org/10.1371/journal.pone.0158918)
- 18
- 19 32. Hsieh C I, Zheng K, Lin C, Mei L, Lu L, Li W, Kuo CF (2021) Automated bone mineral density prediction and
- 20 fracture risk assessment using plain radiographs via deep learning. *Nature communications* 12(1):1-9.
- 21 <https://doi.org/10.1038/s41467-021-25779-x>
- 22
- 23 33. Hong N, Park H, Kim CO et al (2021) Bone Radiomics score derived from DXA Hip images enhances hip fracture
- 24 prediction in older women. *Journal of Bone and Mineral Research* 36(9): 1708-1716. [https://doi.org/ 10.1002/jbmr.4342](https://doi.org/10.1002/jbmr.4342)
- 25
- 26 34. Ho-Le TP, Center JR, Eisman JA, Nguyen TV, Nguyen HT (2017) Prediction of hip fracture in post-menopausal
- 27 women using artificial neural network approach. In 2017 39th Annual International Conference of the IEEE
- 28 *Engineering in Medicine and Biology Society (EMBC)* (pp. 4207-4210). [https://doi.org/ 10.1109/EMBC.2017.8037784](https://doi.org/10.1109/EMBC.2017.8037784)
- 29
- 30 35. Henry M J, Pasco J A, Merriman E N et al (2011) Fracture risk score and absolute risk of fracture. *Radiology* 259(2):
- 31 495-501. [https://doi.org/ 10.1148/radiol.10101406](https://doi.org/10.1148/radiol.10101406)
- 32
- 33 36. Galassi A, Martín-Guerrero JD, Villamor E, Monserrat C, Rupérez MJ (2020) Risk assessment of hip fracture based
- 34 on machine learning. *Applied Bionics and Biomechanics* 2020. [https://doi.org/ 10.1155/2020/8880786](https://doi.org/10.1155/2020/8880786)
- 35
- 36 37. FitzGerald G, Compston JE, Chapurlat RD, Pfeilschifter J, Cooper C, Hosmer D.W, Gehlbach SH (2014) Empirically
- 37 based composite fracture prediction model from the Global Longitudinal Study of Osteoporosis in Postmenopausal
- 38 Women (GLOW). *The Journal of Clinical Endocrinology & Metabolism* 99(3):817-826. [https://doi.org/](https://doi.org/10.1210/jc.2013-3468)
- 39 [10.1210/jc.2013-3468](https://doi.org/10.1210/jc.2013-3468)
- 40
- 41 38. Ferizi U, Besser H, Hysi P, Jacobs J, Rajapakse CS, Chen C, Chang G (2019) Artificial intelligence applied to
- 42 osteoporosis: a performance comparison of machine learning algorithms in predicting fragility fractures from MRI data.
- 43 *Journal of Magnetic Resonance Imaging* 49(4): 1029-1038. [https://doi.org/ 10.1002/jmri.26280](https://doi.org/10.1002/jmri.26280)
- 44
- 45 39. Enns-Bray WS, Bahaloo H, Fleps I, Pauchard Y, Taghizadeh E, Sigurdsson S, Helgason B (2019) Biofidelic finite
- 46 element models for accurately classifying hip fracture in a retrospective clinical study of elderly women from the AGES
- 47 Reykjavik cohort. *Bone* 120:25-37. [https://doi.org/ 10.1016/j.bone.2018.09.014](https://doi.org/10.1016/j.bone.2018.09.014)
- 48
- 49 40. Engels A, Reber K C, Lindlbauer I, Rapp K, Büchele G, Klenk J, König HH (2020) Osteoporotic hip fracture
- 50 prediction from risk factors available in administrative claims data-A machine learning approach. *PloS one*
- 51 15(5):e0232969. [https://doi.org/ 10.1371/journal.pone.0232969](https://doi.org/10.1371/journal.pone.0232969)
- 52
- 53 41. De Vries B C S, Hegeman J H, Nijmeijer W, Nijmeijer W, Geerdink J, Seifert C, Groothuis-Oudshoorn CG M (2021)
- 54 Comparing three machine learning approaches to design a risk assessment tool for future fractures: predicting a
- 55 subsequent major osteoporotic fracture in fracture patients with osteopenia and osteoporosis. *Osteoporosis international*
- 56 32(3):437-449. [https://doi.org/ 10.1007/s00198-020-05735-z](https://doi.org/10.1007/s00198-020-05735-z)
- 57
- 58
- 59
- 60

- 1
- 2
- 3
- 4
- 5 42. Cheung E Y N, Bow C H, Cheung C L, Soong C, Yeung S, Loong C, Kung A (2012) Discriminative value of FRAX
- 6 for fracture prediction in a cohort of Chinese postmenopausal women. *Osteoporosis international*:23(3),
- 7 871-878.[https://doi.org/ 10.1007/s00198-011-1647-5](https://doi.org/10.1007/s00198-011-1647-5)
- 8
- 9 43. Chanplakorn P, Lertudomphonwanit T, Daraphongsataporn N, Sritara C, Jaovisidha S, Sa-Ngasoongsong P (2021)
- 10 Development of prediction model for osteoporotic vertebral compression fracture screening without using clinical risk
- 11 factors, compared with FRAX and other previous models. *Archives of Osteoporosis* 16(1): 1-9.[https://doi.org/](https://doi.org/10.1007/s11657-021-00957-y)
- 12 [10.1007/s11657-021-00957-y](https://doi.org/10.1007/s11657-021-00957-y)
- 13
- 14 44. Bredbenner T L, Mason R L, Havill L M, Orwoll ES, Nicoletta DP, Osteoporotic Fractures in Men (MrOS) Study
- 15 (2014) Fracture risk predictions based on statistical shape and density modeling of the proximal femur. *Journal of bone*
- 16 *and mineral research* 29(9):2090-2100.[https://doi.org/ 10.1002/jbmr.2241](https://doi.org/10.1002/jbmr.2241)
- 17
- 18 45. Beyaz S, Açıcı K, Sümer E (2020) Femoral neck fracture detection in X-ray images using deep learning and genetic
- 19 algorithm approaches. *Joint diseases and related surgery* 31(2): 175.[https://doi.org/ 10.5606/ehc.2020.72163](https://doi.org/10.5606/ehc.2020.72163)
- 20
- 21 46. Berry S D, Zullo A R, Lee Y, Mor V, McConeghy KW, Banerjee G, Kiel DP (2018) Fracture risk assessment in
- 22 long-term care (FRAiL): development and validation of a prediction model. *The Journals of Gerontology: Series A*
- 23 *73(6):763-769*.[https://doi.org/ 10.1093/gerona/glx147](https://doi.org/10.1093/gerona/glx147)
- 24
- 25 47. Beaudoin C, Jean S, Moore L et al (2021) Prediction of Osteoporotic Fractures in Elderly Individuals: A Derivation
- 26 and Internal Validation Study Using Healthcare Administrative Data. *Journal of Bone and Mineral Research* 36(12):
- 27 2329-2342.[https://doi.org/ 10.1002/jbmr.4438](https://doi.org/10.1002/jbmr.4438)
- 28
- 29 48. Baleanu F, Moreau M, Charles A et al (2022) Fragility fractures in postmenopausal women: development of 5-year
- 30 prediction models using the FRISBEE study. *The Journal of Clinical Endocrinology & Metabolism* 107(6):
- 31 e2438-e2448.[https://doi.org/ 10.1210/clinem/dgac092](https://doi.org/10.1210/clinem/dgac092)
- 32
- 33 49. Almog Y A, Rai A, Zhang P et al (2020) Deep learning with electronic health records for short-term fracture risk
- 34 identification: crystal bone algorithm development and validation. *Journal of medical Internet research* 22(10):
- 35 e22550.[https://doi.org/ 10.2196/22550](https://doi.org/10.2196/22550)
- 36
- 37 50. Zagórski P, Tabor E, Martela-Tomaszek K, Adamczyk P, Pluskiewicz W (2021) Five-year fracture risk assessment in
- 38 postmenopausal women, using both the POL-RISK calculator and the Garvan nomogram: the Silesia Osteo Active
- 39 Study. *Archives of Osteoporosis* 16(1): 1-8.<https://doi.org/10.1007/s11657-021-00881-1>
- 40
- 41 51. Diez-Perez A, Gonzalez-Macias J, Marin F et al (2007) Prediction of absolute risk of non-spinal fractures using clinical
- 42 risk factors and heel quantitative ultrasound. *Osteoporosis International* 18(5): 629-639.[https://doi.org/](https://doi.org/10.1007/s00198-006-0297-5)
- 43 [10.1007/s00198-006-0297-5](https://doi.org/10.1007/s00198-006-0297-5)
- 44
- 45 52. Lix L M, Leslie W D, Majumdar S R (2018) Measuring improvement in fracture prediction for a new risk factor: a
- 46 simulation. *BMC Research Notes*, 11(1):1-5.<https://doi.org/10.1186/s13104-018-3178-z>
- 47
- 48 53. Li Q, Long X, Wang Y et al (2021) Development and validation of a nomogram for predicting the probability of
- 49 adjacent segmental fractures after vertebral augmentation of osteoporotic vertebral compression
- 50 fractures.[https://doi.org/ 10.1186/s12891-021-04845-x](https://doi.org/10.1186/s12891-021-04845-x)
- 51
- 52 54. Lee S, Lee JW, Jeong J W, Yoo DS, Kim S (2008) A preliminary study on discrimination of osteoporotic fractured
- 53 group from nonfractured group using support vector machine. In 2008 30th Annual International Conference of the
- 54 IEEE Engineering in Medicine and Biology Society (pp. 474-477).[https://doi.org/ 10.1109/IEMBS.2008.4649193](https://doi.org/10.1109/IEMBS.2008.4649193)
- 55
- 56
- 57
- 58
- 59
- 60

- 1
- 2
- 3
- 4
- 5 55. Jacobs J W G, Da Silva J A P, Armbrecht G et al (2010) Prediction of vertebral fractures is specific for gender and site
- 6 of bone mineral density measurement. *The Journal of Rheumatology* 37(1): 149-154.[https://doi.org/](https://doi.org/10.3899/jrheum.090731)
- 7 10.3899/jrheum.090731
- 8
- 9 56. Eller-Vainicher C, Chiodini I, Santi I et al (2011) Recognition of morphometric vertebral fractures by artificial neural
- 10 networks: analysis from GISMO Lombardia Database. *PLoS One* 6(11): e27277.[https://doi.org/](https://doi.org/10.1371/journal.pone.0027277)
- 11 10.1371/journal.pone.0027277
- 12
- 13 57. Zhong B Y, He S C, Zhu H D et al (2017) Risk prediction of new adjacent vertebral fractures after PVP for patients
- 14 with vertebral compression fractures: development of a prediction model. *Cardiovascular and interventional radiology*
- 15 40(2): 277-284.[https://doi.org/ 10.1007/s00270-016-1492-1](https://doi.org/10.1007/s00270-016-1492-1)
- 16
- 17 58. Xiao X, Wu Q(2021) The Utility of Genetic Risk Score to Improve Performance of FRAX for Fracture Prediction in
- 18 US Postmenopausal Women. *Calcif Tissue Int*108(6):746-756.[https:// doi:10.1007/s00223-021-00809-4](https://doi.org/10.1007/s00223-021-00809-4)
- 19
- 20 59. Pisani P, Renna MD, Conversano F, Casciaro E, Di Paola M, Quarta E, Muratore M, Casciaro S (2016) Major
- 21 osteoporotic fragility fractures: Risk factor updates and societal impact. *World J Orthop* 18;7(3):171-81. [https://doi:](https://doi.org/10.5312/wjo.v7.i3.171)
- 22 10.5312/wjo.v7.i3.171
- 23
- 24 60. Lim HK, Ha HI, Park SY, Han J (2021) Prediction of femoral osteoporosis using machine-learning analysis with
- 25 radiomics features and abdomen-pelvic CT: A retrospective single center preliminary study. *PLoS one*, 16(3),
- 26 e0247330.<https://doi.org/10.1371/journal.pone.0247330>
- 27
- 28 61. Shimizu S (2019) Non-Gaussian methods for causal structure learning. *Prevention Science* 20(3):
- 29 431-441.<https://doi.org/10.1007/s11121-018-0901-x>
- 30
- 31 62. Supawattanabodee B , Wiriyasirivaj B (2018). Utility of Bayesian Logistic Regression Model in the Development of a
- 32 Clinical Risk Score Index for Screening of Osteoporosis in Menopausal Women. *Journal of the medical association of*
- 33 *Thailand* 101(8):193.
- 34
- 35 63. Ganesan N, Venkatesh K, Rama M A et al (2010) Application of neural networks in diagnosing cancer disease using
- 36 demographic data. *International Journal of Computer Applications* 1(26): 76-85.[https://doi.org/ 10.1002/med.21658](https://doi.org/10.1002/med.21658)
- 37
- 38 64. Popescu D, El-Khatib M, El-Khatib H, Ichim L (2022) New Trends in Melanoma Detection Using Neural Networks: A
- 39 Systematic Review. *Sensors (Basel)* 22(2):496.<https://doi.org/10.3390/s22020496>.
- 40
- 41 65. Bellou V, Belbasis L, Konstantinidis A K et al (2019) Prognostic models for outcome prediction in patients with
- 42 chronic obstructive pulmonary disease: systematic review and critical appraisal. *BMJ* 367.[https://doi.org/](https://doi.org/10.1136/bmj.l5358)
- 43 10.1136/bmj.l5358
- 44
- 45 66. De Silva K, Lee W K, Forbes A, Demme RT, Barton C, Enticott J (2020) Use and performance of machine learning
- 46 models for type 2 diabetes prediction in community settings: A systematic review and meta-analysis. *International*
- 47 *journal of medical informatics* 143: 104268.[https://doi.org/ 10.1016/j.ijmedinf.2020.104268](https://doi.org/10.1016/j.ijmedinf.2020.104268)
- 48
- 49 67. Jain R, Sontisirikit S, Iamsirithaworn S et al (2019) Prediction of dengue outbreaks based on disease surveillance,
- 50 meteorological and socio-economic data. *BMC infectious diseases* 19(1): 1-16.[https://doi.org/](https://doi.org/10.1186/s12879-019-3874-x)
- 51 10.1186/s12879-019-3874-x
- 52
- 53 68. Fleuren LM, Klausch TLT, Zwager CL, Schoonmade LJ, Guo T, Roggeveen LF, Swart EL, Girbes ARJ, Thoral P,
- 54 Ercole A, Hoogendoorn M, Elbers PWG (2020) Machine learning for the prediction of sepsis: a systematic review and
- 55 meta-analysis of diagnostic test accuracy. *Intensive Care Med*
- 56 46(3):383-400.<https://doi.org/10.1007/s00134-019-05872-y>
- 57
- 58 69. Hossain M, Akbar SA, Andrew G (2010) Misdiagnosis of occult hip fracture is more likely in patients with poor
- 59
- 60

1  
2  
3  
4  
5 mobility and cognitive impairment. Acta Orthop Belg 76(3):341-6.  
6  
7  
8  
9

### 10 **Figure legends**

11  
12 **Figure 1** The flow chart of retrieval process

13  
14 **Figure 2** Risk of bias assessment (using PROBAST) based on four domains across  
15  
16 88 machine learning models

17  
18 **Figure 3** Forest plots for C-index statistics for subgroup analysis by fracture site and machine  
19  
20 learning type  
21  
22  
23  
24  
25  
26  
27  
28  
29  
30  
31  
32  
33  
34  
35  
36  
37  
38  
39  
40  
41  
42  
43  
44  
45  
46  
47  
48  
49  
50  
51  
52  
53  
54  
55  
56  
57  
58  
59  
60

1  
2  
3  
4  
5  
6  
7  
8  
9  
10  
11  
12  
13  
14  
15  
16  
17  
18  
19  
20  
21  
22  
23  
24  
25  
26  
27  
28  
29  
30  
31  
32  
33  
34  
35  
36  
37  
38  
39  
40  
41  
42  
43  
44  
45  
46  
47  
48  
49  
50  
51  
52  
53  
54  
55  
56  
57  
58  
59  
60

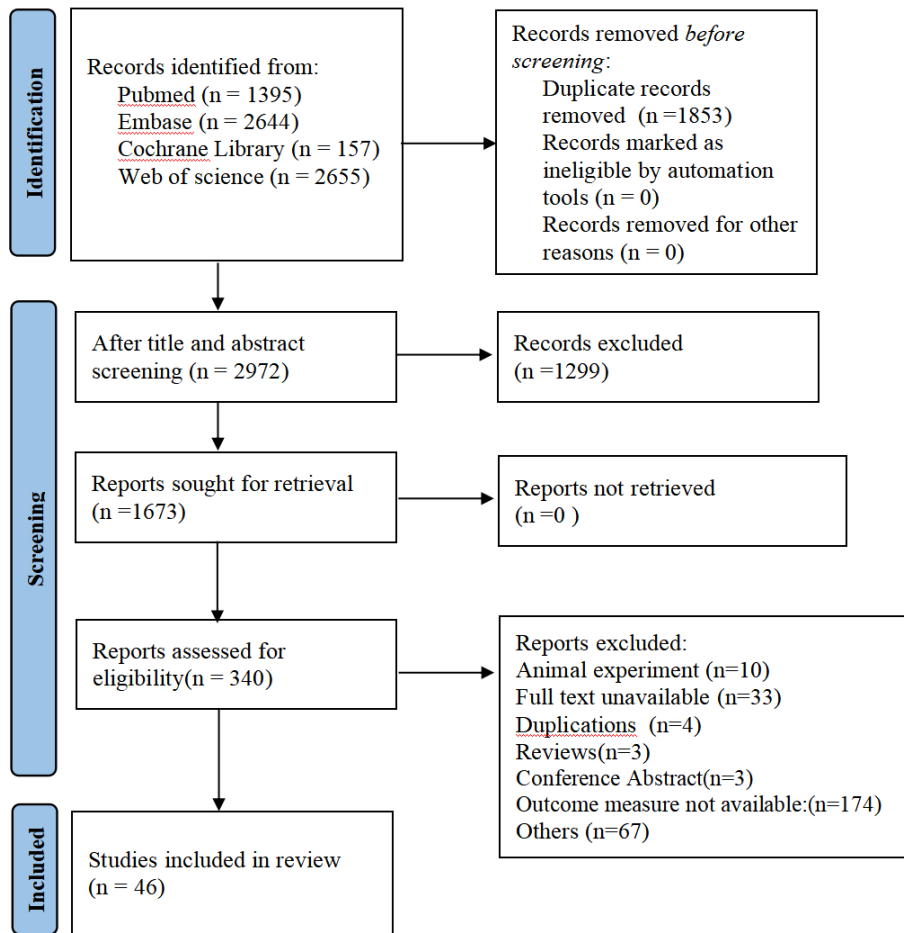

392x382mm (72 x 72 DPI)

1  
2  
3  
4  
5  
6  
7  
8  
9  
10  
11  
12  
13  
14  
15  
16  
17  
18  
19  
20  
21  
22  
23  
24  
25  
26  
27  
28  
29  
30  
31  
32  
33  
34  
35  
36  
37  
38  
39  
40  
41  
42  
43  
44  
45  
46  
47  
48  
49  
50  
51  
52  
53  
54  
55  
56  
57  
58  
59  
60

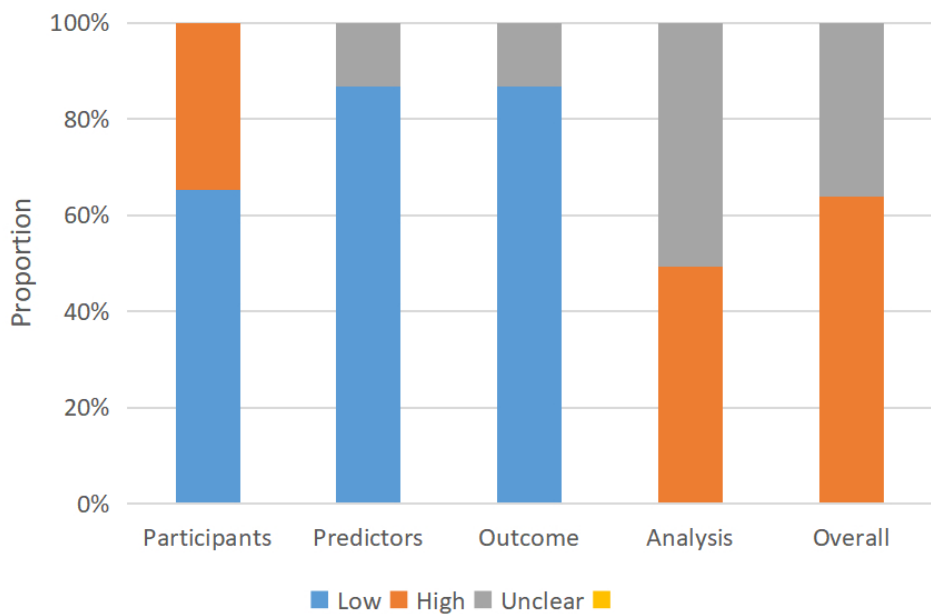

316x207mm (72 x 72 DPI)

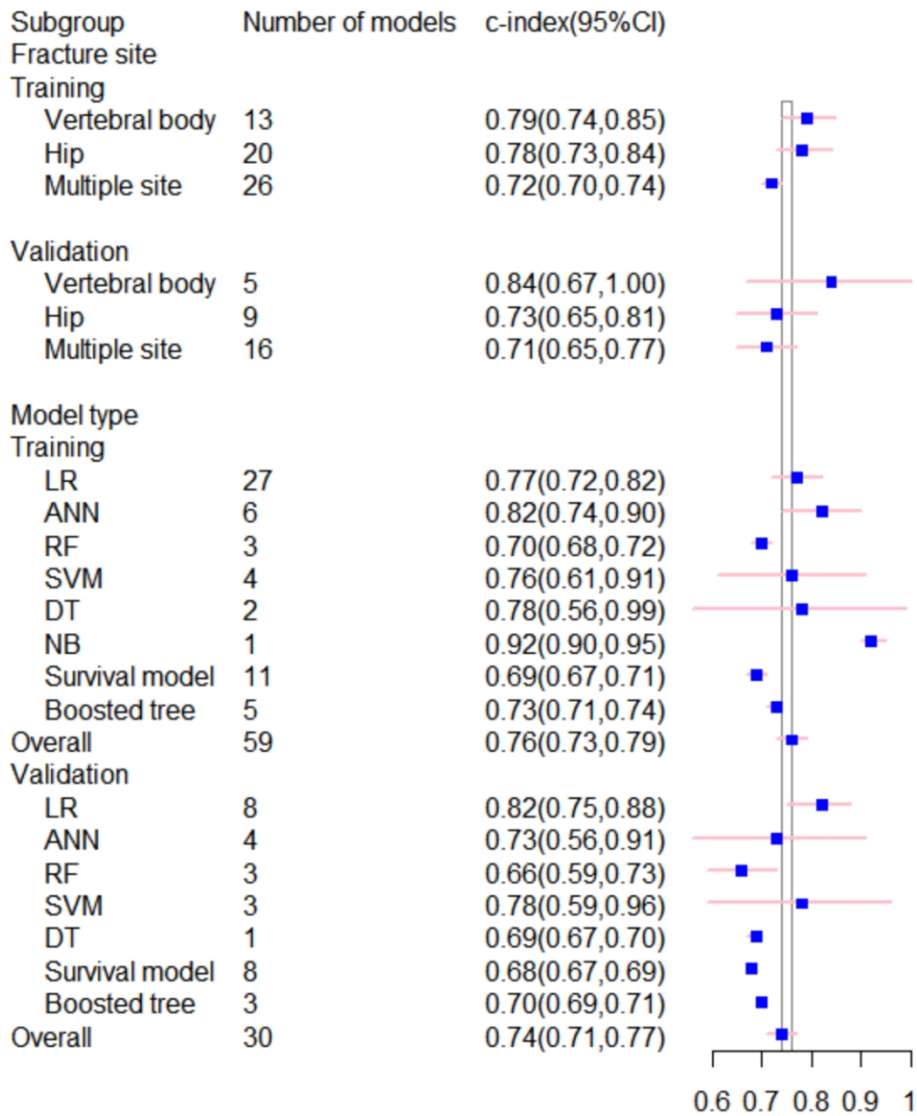

401x502mm (72 x 72 DPI)



| Section and Topic             | Item # | Checklist item                                                                                                                                                                                                                                                                                       | Location where item is reported |
|-------------------------------|--------|------------------------------------------------------------------------------------------------------------------------------------------------------------------------------------------------------------------------------------------------------------------------------------------------------|---------------------------------|
| <b>TITLE</b>                  |        |                                                                                                                                                                                                                                                                                                      |                                 |
| Title                         | 1      | Identify the report as a systematic review.                                                                                                                                                                                                                                                          | 1                               |
| <b>ABSTRACT</b>               |        |                                                                                                                                                                                                                                                                                                      |                                 |
| Abstract                      | 2      | See the PRISMA 2020 for Abstracts checklist.                                                                                                                                                                                                                                                         | 1                               |
| <b>INTRODUCTION</b>           |        |                                                                                                                                                                                                                                                                                                      |                                 |
| Rationale                     | 3      | Describe the rationale for the review in the context of existing knowledge.                                                                                                                                                                                                                          | 2-4                             |
| Objectives                    | 4      | Provide an explicit statement of the objective(s) or question(s) the review addresses.                                                                                                                                                                                                               | 4                               |
| <b>METHODS</b>                |        |                                                                                                                                                                                                                                                                                                      |                                 |
| Eligibility criteria          | 5      | Specify the inclusion and exclusion criteria for the review and how studies were grouped for the syntheses.                                                                                                                                                                                          | 5                               |
| Information sources           | 6      | Specify all databases, registers, websites, organisations, reference lists and other sources searched or consulted to identify studies. Specify the date when each source was last searched or consulted.                                                                                            | 4-5                             |
| Search strategy               | 7      | Present the full search strategies for all databases, registers and websites, including any filters and limits used.                                                                                                                                                                                 | Table S2                        |
| Selection process             | 8      | Specify the methods used to decide whether a study met the inclusion criteria of the review, including how many reviewers screened each record and each report retrieved, whether they worked independently, and if applicable, details of automation tools used in the process.                     | 5-6, Figure 1                   |
| Data collection process       | 9      | Specify the methods used to collect data from reports, including how many reviewers collected data from each report, whether they worked independently, any processes for obtaining or confirming data from study investigators, and if applicable, details of automation tools used in the process. | 6                               |
| Data items                    | 10a    | List and define all outcomes for which data were sought. Specify whether all results that were compatible with each outcome domain in each study were sought (e.g. for all measures, time points, analyses), and if not, the methods used to decide which results to collect.                        | 6                               |
|                               | 10b    | List and define all other variables for which data were sought (e.g. participant and intervention characteristics, funding sources). Describe any assumptions made about any missing or unclear information.                                                                                         | Table S3                        |
| Study risk of bias assessment | 11     | Specify the methods used to assess risk of bias in the included studies, including details of the tool(s) used, how many reviewers assessed each study and whether they worked independently, and if applicable, details of automation tools used in the process.                                    | 6-7, Figure 2                   |
| Effect measures               | 12     | Specify for each outcome the effect measure(s) (e.g. risk ratio, mean difference) used in the synthesis or presentation of results.                                                                                                                                                                  | 7                               |
| Synthesis methods             | 13a    | Describe the processes used to decide which studies were eligible for each synthesis (e.g. tabulating the study intervention characteristics and comparing against the planned groups for each synthesis (item #5)).                                                                                 | 7                               |
|                               | 13b    | Describe any methods required to prepare the data for presentation or synthesis, such as handling of missing summary statistics, or data conversions.                                                                                                                                                | 7                               |
|                               | 13c    | Describe any methods used to tabulate or visually display results of individual studies and syntheses.                                                                                                                                                                                               | 7                               |
|                               | 13d    | Describe any methods used to synthesize results and provide a rationale for the choice(s). If meta-analysis was performed, describe the model(s), method(s) to identify the presence and extent of statistical heterogeneity, and software package(s) used.                                          | 7-8                             |
|                               | 13e    | Describe any methods used to explore possible causes of heterogeneity among study results (e.g. subgroup analysis, meta-regression).                                                                                                                                                                 | Table3,Table4                   |
|                               | 13f    | Describe any sensitivity analyses conducted to assess robustness of the synthesized results.                                                                                                                                                                                                         | 7                               |
| Reporting bias assessment     | 14     | Describe any methods used to assess risk of bias due to missing results in a synthesis (arising from reporting biases).                                                                                                                                                                              | 6-7                             |
| Certainty assessment          | 15     | Describe any methods used to assess certainty (or confidence) in the body of evidence for an outcome.                                                                                                                                                                                                | 7                               |
| <b>RESULTS</b>                |        |                                                                                                                                                                                                                                                                                                      |                                 |
| Study selection               | 16a    | Describe the results of the search and selection process, from the number of records identified in the search to the number of studies included in the review, ideally using a flow diagram.                                                                                                         | 8                               |
|                               | 16b    | Cite studies that might appear to meet the inclusion criteria, but which were excluded, and explain why they were excluded.                                                                                                                                                                          | Figure 1                        |

| Section and Topic                                 | Item # | Checklist item                                                                                                                                                                                                                                                                       | Location where item is reported         |
|---------------------------------------------------|--------|--------------------------------------------------------------------------------------------------------------------------------------------------------------------------------------------------------------------------------------------------------------------------------------|-----------------------------------------|
| 1<br>2 Study characteristics                      | 17     | Cite each included study and present its characteristics.                                                                                                                                                                                                                            | 7-8, Table 1                            |
| 3<br>4 Risk of bias in studies                    | 18     | Present assessments of risk of bias for each included study.                                                                                                                                                                                                                         | 9, Figure 2, Table S4                   |
| 5<br>6 Results of individual studies              | 19     | For all outcomes, present, for each study: (a) summary statistics for each group (where appropriate) and (b) an effect estimate and its precision (e.g. confidence/credible interval), ideally using structured tables or plots.                                                     | 9-10, Table S2                          |
| 7<br>8 Results of syntheses                       | 20a    | For each synthesis, briefly summarise the characteristics and risk of bias among contributing studies.                                                                                                                                                                               | 10-11                                   |
| 9                                                 | 20b    | Present results of all statistical syntheses conducted. If meta-analysis was done, present for each the summary estimate and its precision (e.g. confidence/credible interval) and measures of statistical heterogeneity. If comparing groups, describe the direction of the effect. | 10, Figure 3, Table 3                   |
| 10                                                | 20c    | Present results of all investigations of possible causes of heterogeneity among study results.                                                                                                                                                                                       | 10-11, Table 3                          |
| 11                                                | 20d    | Present results of all sensitivity analyses conducted to assess the robustness of the synthesized results.                                                                                                                                                                           | 10-11, Figure 4, Table 4                |
| 12                                                |        |                                                                                                                                                                                                                                                                                      |                                         |
| 13                                                |        |                                                                                                                                                                                                                                                                                      |                                         |
| 14 Reporting biases                               | 21     | Present assessments of risk of bias due to missing results (arising from reporting biases) for each synthesis assessed.                                                                                                                                                              | 9, Figure 2                             |
| 15<br>16 Certainty of evidence                    | 22     | Present assessments of certainty (or confidence) in the body of evidence for each outcome assessed.                                                                                                                                                                                  | Table 3, Table 4                        |
| 17                                                |        |                                                                                                                                                                                                                                                                                      |                                         |
| <b>DISCUSSION</b>                                 |        |                                                                                                                                                                                                                                                                                      |                                         |
| 18 Discussion                                     | 23a    | Provide a general interpretation of the results in the context of other evidence.                                                                                                                                                                                                    | 11-15                                   |
| 19                                                | 23b    | Discuss any limitations of the evidence included in the review.                                                                                                                                                                                                                      | 14-15                                   |
| 20                                                | 23c    | Discuss any limitations of the review processes used.                                                                                                                                                                                                                                | 14                                      |
| 21                                                | 23d    | Discuss implications of the results for practice, policy, and future research.                                                                                                                                                                                                       | 15                                      |
| 22                                                |        |                                                                                                                                                                                                                                                                                      |                                         |
| <b>OTHER INFORMATION</b>                          |        |                                                                                                                                                                                                                                                                                      |                                         |
| 23                                                |        |                                                                                                                                                                                                                                                                                      |                                         |
| 24 Registration and protocol                      | 24a    | Provide registration information for the review, including register name and registration number, or state that the review was not registered.                                                                                                                                       | 4, Registration No. CRD42022346896      |
| 25                                                | 24b    | Indicate where the review protocol can be accessed, or state that a protocol was not prepared.                                                                                                                                                                                       | The protocol was registered on PROSPERO |
| 26                                                | 24c    | Describe and explain any amendments to information provided at registration or in the protocol.                                                                                                                                                                                      | NA                                      |
| 27                                                |        |                                                                                                                                                                                                                                                                                      |                                         |
| 28                                                |        |                                                                                                                                                                                                                                                                                      |                                         |
| 29 Support                                        | 25     | Describe sources of financial or non-financial support for the review, and the role of the funders or sponsors in the review.                                                                                                                                                        | 15                                      |
| 30                                                |        |                                                                                                                                                                                                                                                                                      |                                         |
| 31 Competing interests                            | 26     | Declare any competing interests of review authors.                                                                                                                                                                                                                                   | 16                                      |
| 32                                                |        |                                                                                                                                                                                                                                                                                      |                                         |
| 33                                                |        |                                                                                                                                                                                                                                                                                      |                                         |
| 34 Availability of data, code and other materials | 27     | Report which of the following are publicly available and where they can be found: template data collection forms; data extracted from included studies; data used for all analyses; analytic code; any other materials used in the review.                                           | Table 1, Table S3                       |
| 35                                                |        |                                                                                                                                                                                                                                                                                      |                                         |
| 36                                                |        |                                                                                                                                                                                                                                                                                      |                                         |
| 37                                                |        |                                                                                                                                                                                                                                                                                      |                                         |

38 From: Page MJ, McKenzie JE, Bossuyt PM, Boutron I, Hoffmann TC, Mulrow CD, et al. The PRISMA 2020 statement: an updated guideline for reporting systematic reviews. BMJ 2021;372:n71. doi:  
39 10.1136/bmj.n71

Table S2 Literature search strategy

1.Pubmed

| Search number | Query                                                                                                                                                                                                                                                                                                                                                                                                                                                                                                                                                                                                                                                          | Results |
|---------------|----------------------------------------------------------------------------------------------------------------------------------------------------------------------------------------------------------------------------------------------------------------------------------------------------------------------------------------------------------------------------------------------------------------------------------------------------------------------------------------------------------------------------------------------------------------------------------------------------------------------------------------------------------------|---------|
| #1            | "Osteoporosis"[Mesh]                                                                                                                                                                                                                                                                                                                                                                                                                                                                                                                                                                                                                                           | 59,962  |
| #2            | "Osteoporosis"[Title/Abstract] OR "Osteoporoses"[Title/Abstract] OR "bone loss age related"[Title/Abstract] OR "age related bone loss"[Title/Abstract] OR "age related bone losses"[Title/Abstract] OR "bone loss age related"[Title/Abstract] OR (("bone and bones"[MeSH Terms] OR ("Bone"[All Fields] AND "bones"[All Fields]) OR "bone and bones"[All Fields] OR "Bone"[All Fields]) AND "Losses"[All Fields]) AND "Age-Related"[Title/Abstract])                                                                                                                                                                                                           | 77,866  |
| #3            | "Osteoporosis"[MeSH Terms] OR ("Osteoporosis"[Title/Abstract] OR "Osteoporoses"[Title/Abstract] OR "bone loss age related"[Title/Abstract] OR "age related bone loss"[Title/Abstract] OR "age related bone losses"[Title/Abstract] OR "bone loss age related"[Title/Abstract] OR (("bone and bones"[MeSH Terms] OR ("Bone"[All Fields] AND "bones"[All Fields]) OR "bone and bones"[All Fields] OR "Bone"[All Fields]) AND "Losses"[All Fields]) AND "Age-Related"[Title/Abstract]))                                                                                                                                                                           | 95,574  |
| #4            | "Machine Learning"[Mesh]                                                                                                                                                                                                                                                                                                                                                                                                                                                                                                                                                                                                                                       | 41,875  |
| #5            | "machine learning"[Title/Abstract] OR "transfer learning"[Title/Abstract] OR "deep learning"[Title/Abstract] OR "prediction model"[Title/Abstract] OR "artificial intelligence"[Title/Abstract] OR "random forest"[Title/Abstract] OR "artificial neural network"[Title/Abstract] OR "ANN"[Title/Abstract] OR "support vector machine"[Title/Abstract] OR "SVM"[Title/Abstract] OR "gradient boosting machine"[Title/Abstract] OR "GBM"[Title/Abstract] OR "Nomogram"[Title/Abstract] OR "XGboost"[Title/Abstract] OR "Logistic"[Title/Abstract] OR "decision tree"[Title/Abstract] OR "external validation"[Title/Abstract]                                   | 554,732 |
| #6            | "Machine Learning"[MeSH Terms] OR "Machine Learning"[Title/Abstract] OR "transfer learning"[Title/Abstract] OR "deep learning"[Title/Abstract] OR "prediction model"[Title/Abstract] OR "artificial intelligence"[Title/Abstract] OR "random forest"[Title/Abstract] OR "artificial neural network"[Title/Abstract] OR "ANN"[Title/Abstract] OR "support vector machine"[Title/Abstract] OR "SVM"[Title/Abstract] OR "gradient boosting machine"[Title/Abstract] OR "GBM"[Title/Abstract] OR "Nomogram"[Title/Abstract] OR "XGboost"[Title/Abstract] OR "Logistic"[Title/Abstract] OR "decision tree"[Title/Abstract] OR "external validation"[Title/Abstract] | 560,576 |
| #7            | "fractures, bone"[MeSH]                                                                                                                                                                                                                                                                                                                                                                                                                                                                                                                                                                                                                                        | 198,823 |
| #8            | "fractures bone"[Title/Abstract] OR "broken bones"[Title/Abstract] OR "bone broken"[Title/Abstract] OR "bones broken"[Title/Abstract] OR "broken bone"[Title/Abstract] OR "Fractures"[Title/Abstract] OR "Fracture"[Title/Abstract]                                                                                                                                                                                                                                                                                                                                                                                                                            | 282,444 |
| #9            | "fractures, bone"[MeSH Terms] OR "fractures bone"[Title/Abstract] OR "broken bones"[Title/Abstract] OR "bone broken"[Title/Abstract] OR "bones broken"[Title/Abstract] OR "broken bone"[Title/Abstract] OR "Fractures"[Title/Abstract] OR "Fracture"[Title/Abstract]                                                                                                                                                                                                                                                                                                                                                                                           | 325,361 |
| #10           | #3AND #6 AND #9                                                                                                                                                                                                                                                                                                                                                                                                                                                                                                                                                                                                                                                | 1,395   |

2.Cochrane

| Search number | Query                                                                                                                                                             | Results |
|---------------|-------------------------------------------------------------------------------------------------------------------------------------------------------------------|---------|
| #1            | MeSH descriptor: [Osteoporosis] explode all trees                                                                                                                 | 4,308   |
| #2            | (Osteoporosis):ti,ab,kw OR (Osteoporoses):ti,ab,kw OR (Bone Loss, Age-Related):ti,ab,kw OR (Age-Related Bone Loss):ti,ab,kw OR (Age-Related Bone Losses):ti,ab,kw | 11,404  |
| #3            | (Bone Loss, Age Related):ti,ab,kw OR (Bone Losses, Age-Related):ti,ab,kw                                                                                          | 510     |
| #4            | #1 OR #2 OR #3                                                                                                                                                    | 11,690  |
| #5            | MeSH descriptor: [Machine Learning] explode all trees                                                                                                             | 200     |
| #6            | (machine learning):ti,ab,kw OR (Transfer Learning):ti,ab,kw OR (Deep learning):ti,ab,kw OR (Machine Learning):ti,ab,kw                                            | 8,873   |

|   |                                                                                                                                              |        |
|---|----------------------------------------------------------------------------------------------------------------------------------------------|--------|
|   | (Prediction model):ti,ab,kw OR (artificial intelligence):ti,ab,kw                                                                            |        |
| 1 | #7 (random forest):ti,ab,kw OR (artificial neural network):ti,ab,kw OR (ANN):ti,ab,kw OR (Support vector machine):ti,ab,kw OR (SVM):ti,ab,kw | 3,025  |
| 2 | #8 (Gradient Boosting Machine):ti,ab,kw OR (GBM):ti,ab,kw OR (Nomogram):ti,ab,kw OR (XGboost):ti,ab,kw OR (Logistic):ti,ab,kw                | 29,213 |
| 3 | #9 (Decision tree):ti,ab,kw OR (External validation):ti,ab,kw                                                                                | 1,737  |
| 4 | #10 #5 OR #6 OR #7 OR #8 OR #9                                                                                                               | 39,732 |
| 5 | #11 MeSH descriptor: [Fractures, Bone] explode all trees                                                                                     | 6,688  |
| 6 | #12 (Fractures, Bone):ti,ab,kw OR (Broken Bones):ti,ab,kw OR (Bone, Broken):ti,ab,kw OR (Bones, Broken):ti,ab,kw OR (Broken Bone):ti,ab,kw   | 8,663  |
| 7 | #13 (Fractures):ti,ab,kw OR (Fracture):ti,ab,kw                                                                                              | 25,188 |
| 8 | #14 #11 OR #12 OR #13                                                                                                                        | 25,283 |
| 9 | #15 #4 AND #10 AND #14                                                                                                                       | 157    |

14 **3.Embase**

| 15 Search number | 16 Query                                                                                                                                                                                                                                                                                                                                                                                                                               | Results   |
|------------------|----------------------------------------------------------------------------------------------------------------------------------------------------------------------------------------------------------------------------------------------------------------------------------------------------------------------------------------------------------------------------------------------------------------------------------------|-----------|
| 17 #1            | 'osteoporosis'/exp                                                                                                                                                                                                                                                                                                                                                                                                                     | 144,364   |
| 18 #2            | 'osteoporosis':ab,ti OR 'osteoporoses':ab,ti OR 'bone loss, age-related':ab,ti OR 'age-related bone loss':ab,ti OR 'age-related bone losses':ab,ti OR 'bone loss, age related':ab,ti OR 'bone losses, age-related':ab,ti                                                                                                                                                                                                               | 115,173   |
| 21 #3            | #1 OR #2                                                                                                                                                                                                                                                                                                                                                                                                                               | 167,079   |
| 22 #4            | 'machine learning'/exp                                                                                                                                                                                                                                                                                                                                                                                                                 | 300,972   |
| 23 #5            | 'machine learning':ab,ti OR 'transfer learning':ab,ti OR 'deep learning':ab,ti OR 'prediction model':ab,ti OR 'artificial intelligence':ab,ti OR 'random forest':ab,ti OR 'artificial neural network':ab,ti OR ann:ab,ti OR 'support vector machine':ab,ti OR svm:ab,ti OR 'gradient boosting machine':ab,ti OR gbm:ab,ti OR nomogram:ab,ti OR xgboost:ab,ti OR logistic:ab,ti OR 'decision tree':ab,ti OR 'external validation':ab,ti | 814,126   |
| 28 #6            | #4 OR #5                                                                                                                                                                                                                                                                                                                                                                                                                               | 1,002,289 |
| 29 #7            | 'fracture'/exp                                                                                                                                                                                                                                                                                                                                                                                                                         | 362,337   |
| 30 #8            | 'fractures, bone':ab,ti OR 'broken bones':ab,ti OR 'bone, broken':ab,ti OR 'bones, broken':ab,ti OR 'broken bone':ab,ti OR 'fractures':ab,ti OR 'fracture':ab,ti                                                                                                                                                                                                                                                                       | 343,893   |
| 32 #9            | #7 OR #8                                                                                                                                                                                                                                                                                                                                                                                                                               | 445,516   |
| 33 #10           | #3 AND #6 AND #9                                                                                                                                                                                                                                                                                                                                                                                                                       | 2,644     |

41 **4.Web of science**

| 42 Search number | 43 Query                                                                                                                                                                                | Results |
|------------------|-----------------------------------------------------------------------------------------------------------------------------------------------------------------------------------------|---------|
| 44 #1            | Osteoporosis (Topic) or Osteoporoses (Topic) or Bone Loss, Age-Related (Topic) or Age-Related Bone Loss (Topic) or Age-Related Bone Losses (Topic) or Bone Loss, Age-Related (Topic) or | 104,281 |

For peer review only

http://bmjopen.bmj.com/site/about/guidelines.xhtml

|   |                                                                                                                                                                                                                                                                                                                                                                                                                                                          |           |
|---|----------------------------------------------------------------------------------------------------------------------------------------------------------------------------------------------------------------------------------------------------------------------------------------------------------------------------------------------------------------------------------------------------------------------------------------------------------|-----------|
|   | Bone Losses, Age-Related (Topic)                                                                                                                                                                                                                                                                                                                                                                                                                         |           |
| 1 | #2<br>machine learning (Topic) or Transfer Learning (Topic) or Deep learning (Topic) or Prediction model (Topic) or artificial intelligence (Topic) or random forest (Topic) or artificial neural network (Topic) or ANN (Topic) or Support vector machine (Topic) or SVM (Topic) or Gradient Boosting Machine (Topic) or GBM (Topic) or Nomogram (Topic) or XGboost (Topic) or Logistic (Topic) or Decision tree (Topic) or External validation (Topic) | 1,950,484 |
| 2 |                                                                                                                                                                                                                                                                                                                                                                                                                                                          |           |
| 3 |                                                                                                                                                                                                                                                                                                                                                                                                                                                          |           |
| 4 |                                                                                                                                                                                                                                                                                                                                                                                                                                                          |           |
| 5 | #3<br>Fractures, Bone (Topic) or Broken Bones (Topic) or Bone, Broken (Topic) or Bones, Broken (Topic) or Broken Bone (Topic) or Fractures (Topic) or Fracture (Topic)                                                                                                                                                                                                                                                                                   | 575,668   |
| 6 | #4<br>#1 AND #2 AND #3                                                                                                                                                                                                                                                                                                                                                                                                                                   | 2,655     |
| 7 |                                                                                                                                                                                                                                                                                                                                                                                                                                                          |           |

8  
9  
10  
11  
12  
13  
14  
15  
16  
17  
18  
19  
20  
21  
22  
23  
24  
25  
26  
27  
28  
29  
30  
31  
32  
33  
34  
35  
36  
37  
38  
39  
40  
41  
42  
43  
44  
45  
46  
47

For peer review only

**Table S3** Methodological characteristics of machine learning models developed for outcome prediction in patients with Osteoporosis

|    | Author         | Year | Data set | Gender | Fracture site      | Events | Sample size | Model type | C-index | Sensitivity |
|----|----------------|------|----------|--------|--------------------|--------|-------------|------------|---------|-------------|
| 1  |                |      |          |        |                    |        |             |            |         |             |
| 2  |                |      |          |        |                    |        |             |            |         |             |
| 3  |                |      |          |        |                    |        |             |            |         |             |
| 4  | Wu, Q          | 2020 | Train    | M      | Multiple fractures | 361    | 4104        | LR         |         |             |
| 5  |                |      |          |        |                    |        |             |            |         |             |
| 6  | Wu, Q          | 2020 | Train    | M      | Multiple fractures | 361    | 4104        | RF         |         |             |
| 7  |                |      |          |        |                    |        |             |            |         |             |
| 8  | Wu, Q          | 2020 | Train    | M      | Multiple fractures | 361    | 4104        | BT         |         |             |
| 9  |                |      |          |        |                    |        |             |            |         |             |
| 10 | Wu, Q          | 2020 | Train    | M      | Multiple fractures | 361    | 4104        | ANN        |         |             |
| 11 |                |      |          |        |                    |        |             |            |         |             |
| 12 | Wu, Q          | 2020 | Train    | M      | Multiple fractures | 361    | 4104        | ANN        |         |             |
| 13 |                |      |          |        |                    |        |             |            |         |             |
| 14 | Wu, Q          | 2020 | Test     | M      | Multiple fractures | 90     | 1026        | LR         | 0.6410  | 0.7610      |
| 15 |                |      |          |        |                    |        |             |            |         |             |
| 16 | Wu, Q          | 2020 | Test     | M      | Multiple fractures | 90     | 1026        | RF         | 0.7005  | 0.7000      |
| 17 |                |      |          |        |                    |        |             |            |         |             |
| 18 | Wu, Q          | 2020 | Test     | M      | Multiple fractures | 90     | 1026        | BT         | 0.7100  | 0.5650      |
| 19 |                |      |          |        |                    |        |             |            |         |             |
| 20 | Wu, Q          | 2020 | Test     | M      | Multiple fractures | 90     | 1026        | ANN        | 0.6910  | 0.7120      |
| 21 |                |      |          |        |                    |        |             |            |         |             |
| 22 | Villamor, E    | 2020 | Train    | F      | Hip fracture       | 65     | 101         | LR         |         |             |
| 23 |                |      |          |        |                    |        |             |            |         |             |
| 24 | Villamor, E    | 2020 | Train    | F      | Hip fracture       | 65     | 101         | SVM        |         |             |
| 25 |                |      |          |        |                    |        |             |            |         |             |
| 26 | Villamor, E    | 2020 | Train    | F      | Hip fracture       | 65     | 101         | ANN        |         |             |
| 27 |                |      |          |        |                    |        |             |            |         |             |
| 28 | Villamor, E    | 2020 | Train    | F      | Hip fracture       | 65     | 101         | RF         |         |             |
| 29 |                |      |          |        |                    |        |             |            |         |             |
| 30 | Villamor, E    | 2020 | Test     | F      | Hip fracture       | 65     | 101         | LR         |         |             |
| 31 |                |      |          |        |                    |        |             |            |         |             |
| 32 | Villamor, E    | 2020 | Test     | F      | Hip fracture       | 65     | 101         | SVM        |         |             |
| 33 |                |      |          |        |                    |        |             |            |         |             |
| 34 | Villamor, E    | 2020 | Test     | F      | Hip fracture       | 65     | 101         | ANN        |         |             |
| 35 |                |      |          |        |                    |        |             |            |         |             |
| 36 | Villamor, E    | 2020 | Test     | F      | Hip fracture       | 65     | 101         | RF         |         |             |
| 37 |                |      |          |        |                    |        |             |            |         |             |
| 38 |                |      |          |        |                    |        |             |            |         |             |
| 39 | van Geel, Tacm | 2011 | Train    | F      | Vertebral fracture | 382    | 2372        | SM         |         |             |
| 40 |                |      |          |        |                    |        |             |            |         |             |
| 41 | Ulivieri, F. M | 2021 | Train    | F      | Vertebral fracture | 56     | 90          | ANN        | 0.8300  | 0.7500      |
| 42 |                |      |          |        |                    |        |             |            |         |             |
| 43 | Yoda, T        | 2021 | Train    | M+F    | Vertebral fracture | 28     | 50          | CNN        | 0.9670  | 0.9250      |
| 44 |                |      |          |        |                    |        |             |            |         |             |

|    | Author            | Year | Data set | Gender | Fracture site      | Events | Sample size | Model type | C-index | Sensitivity |
|----|-------------------|------|----------|--------|--------------------|--------|-------------|------------|---------|-------------|
| 1  |                   |      |          |        |                    |        |             |            |         |             |
| 2  |                   |      |          |        |                    |        |             |            |         |             |
| 3  |                   |      |          |        |                    |        |             |            |         |             |
| 4  | Yoda, T           | 2021 | Test     | M+F    | Vertebral fracture | 21     | 47          | CNN        | 0.9840  | 0.9810      |
| 5  |                   |      |          |        |                    |        |             |            |         |             |
| 6  | Jiang, X. Z       | 2013 | Train    | F      | Multiple fractures | 15     | 615         | LR         | 0.7600  | 0.8100      |
| 7  |                   |      |          |        |                    |        |             |            |         |             |
| 8  | Schousboe, J. T   | 2014 | Train    | F      | Vertebral fracture | 2883   | 7233        | LR         | 0.6790  |             |
| 9  |                   |      |          |        |                    |        |             |            |         |             |
| 10 | Sandhu, S. K      | 2010 | Train    | F      | Multiple fractures | 47     | 144         | LR         | 0.8400  | 0.7800      |
| 11 |                   |      |          |        |                    |        |             |            |         |             |
| 12 | Sandhu, S. K      | 2010 | Train    | M      | Multiple fractures | 18     | 56          | LR         | 0.7600  | 0.7400      |
| 13 |                   |      |          |        |                    |        |             |            |         |             |
| 14 | Rubin, K. H       | 2018 | Train    | F      | Multiple fractures | 11898  | 647103      | LR         | 0.7500  | 0.7520      |
| 15 |                   |      |          |        |                    |        |             |            |         |             |
| 16 | Rubin, K. H       | 2018 | Train    | M      | Multiple fractures | 11851  | 647103      | LR         | 0.7520  | 0.6450      |
| 17 |                   |      |          |        |                    |        |             |            |         |             |
| 18 | Rubin, K. H       | 2018 | Test     | F      | Multiple fractures | 4762   | 600567      | LR         | 0.8740  | 0.6000      |
| 19 |                   |      |          |        |                    |        |             |            |         |             |
| 20 | Rubin, K. H       | 2018 | Test     | M      | Multiple fractures | 4776   | 600566      | LR         | 0.8510  | 0.6300      |
| 21 |                   |      |          |        |                    |        |             |            |         |             |
| 22 | Pluskiewicz, W    | 2010 | Train    | F      | Hip fracture       | 1599   | 2012        | LR         | 0.850   | 0.7590      |
| 23 |                   |      |          |        |                    |        |             |            |         |             |
| 24 | Pluskiewicz, W    | 2010 | Train    | F      | Multiple fractures | 1704   | 2012        | LR         | 0.8790  | 0.7390      |
| 25 |                   |      |          |        |                    |        |             |            |         |             |
| 26 | Jang, E. J        | 2016 | Train    | M      | Multiple fractures | 36     | 363         | LR         | 0.7390  |             |
| 27 |                   |      |          |        |                    |        |             |            |         |             |
| 28 | Jang, E. J        | 2016 | Train    | F      | Multiple fractures | 50     | 405         | LR         | 0.7180  |             |
| 29 |                   |      |          |        |                    |        |             |            |         |             |
| 30 | Barret A. Monchka | 2021 | Train    | M+F    | Vertebral fracture | 1470   | 8920        | CNN        | 0.9500  | 0.8240      |
| 31 |                   |      |          |        |                    |        |             |            |         |             |
| 32 | Mehta, S. D       | 2020 | Train    | M+F    | Vertebral fracture | 86     | 246         | SVM        | 0.9258  | 0.8950      |
| 33 |                   |      |          |        |                    |        |             |            |         |             |
| 34 | Mehta, S. D       | 2020 | Test     | M+F    | Vertebral fracture | 22     | 61          | SVM        | 0.8963  | 0.8180      |
| 35 |                   |      |          |        |                    |        |             |            |         |             |
| 36 | Langsetmo, L      | 2011 | Test     | M      | Multiple fractures | 139    | 1606        | SM         | 0.7000  |             |
| 37 |                   |      |          |        |                    |        |             |            |         |             |
| 38 | Langsetmo, L      | 2011 | Test     | F      | Multiple fractures | 672    | 4152        | SM         | 0.6900  |             |
| 39 |                   |      |          |        |                    |        |             |            |         |             |
| 40 | Ioannidis, G      | 2017 | Train    | M+F    | Multiple fractures | 3858   | 22386       | DT         | 0.6690  |             |
| 41 |                   |      |          |        |                    |        |             |            |         |             |
| 42 | Ioannidis, G      | 2017 | Test     | M+F    | Multiple fractures | 1294   | 7462        | DT         | 0.6870  |             |
| 43 |                   |      |          |        |                    |        |             |            |         |             |
| 44 |                   |      |          |        |                    |        |             |            |         |             |
| 45 |                   |      |          |        |                    |        |             |            |         |             |
| 46 |                   |      |          |        |                    |        |             |            |         |             |
| 47 |                   |      |          |        |                    |        |             |            |         |             |

|    | Author      | Year | Data set | Gender | Fracture site      | Events | Sample size | Model type | C-index | Sensitivity |
|----|-------------|------|----------|--------|--------------------|--------|-------------|------------|---------|-------------|
| 1  |             |      |          |        |                    |        |             |            |         |             |
| 2  |             |      |          |        |                    |        |             |            |         |             |
| 3  | K. K.       | 2013 | Train    | F      | Multiple fractures | 44     | 88          | SVM        | 0.6800  | 0.5280      |
| 4  | Nishiyama   |      |          |        |                    |        |             |            |         |             |
| 5  | K. K.       | 2013 | Test     | F      | Multiple fractures | 14     | 28          | SVM        | 0.8000  | 0.6880      |
| 6  | Nishiyama   |      |          |        |                    |        |             |            |         |             |
| 7  |             |      |          |        |                    |        |             |            |         |             |
| 8  | Kruse, C    | 2017 | Train    | F      | Hip fracture       | 293    | 4722        | NB         | 0.9200  | 0.8800      |
| 9  |             |      |          |        |                    |        |             |            |         |             |
| 10 | Kruse, C    | 2017 | Train    | M      | Hip fracture       | 47     | 717         | DT         | 0.8900  | 1.0000      |
| 11 |             |      |          |        |                    |        |             |            |         |             |
| 12 | Kolanu, N   | 2021 | Train    | M+F    | Multiple fractures | 433    | 5089        | ANN        |         | 0.9900      |
| 13 |             |      |          |        |                    |        |             |            |         |             |
| 14 | Kolanu, N   | 2021 | Test     | M+F    | Multiple fractures | 97     | 327         | ANN        |         | 0.6960      |
| 15 |             |      |          |        |                    |        |             |            |         |             |
| 16 | Kim, H. Y   | 2016 | Train    | M      | Multiple fractures | 4889   | 185127      | SM         | 0.6800  |             |
| 17 |             |      |          |        |                    |        |             |            |         |             |
| 18 | Kim, H. Y   | 2016 | Train    | F      | Multiple fractures | 14951  | 174126      | SM         | 0.6500  |             |
| 19 |             |      |          |        |                    |        |             |            |         |             |
| 20 | Kim, H. Y   | 2016 | Test     | M+F    | Multiple fractures | 19915  | 359255      | SM         | 0.6650  |             |
| 21 |             |      |          |        |                    |        |             |            |         |             |
| 22 |             |      |          |        |                    |        |             |            |         |             |
| 23 | Hsieh, C. I | 2021 | Train    | M+F    | Hip fracture       | 2254   | 5164        | LR         | 0.9700  | 0.8820      |
| 24 |             |      |          |        |                    |        |             |            |         |             |
| 25 | Hsieh, C. I | 2021 | Test     | M+F    | Hip fracture       | 922    | 2060        | LR         | 0.9600  | 0.8990      |
| 26 |             |      |          |        |                    |        |             |            |         |             |
| 27 | Hsieh, C. I | 2021 | Train    | M+F    | Vertebral fracture | 530    | 57662       | LR         | 0.9700  | 0.6960      |
| 28 |             |      |          |        |                    |        |             |            |         |             |
| 29 | Hsieh, C. I | 2021 | Test     | M+F    | Vertebral fracture | 922    | 3346        | LR         | 0.9400  | 0.7400      |
| 30 |             |      |          |        |                    |        |             |            |         |             |
| 31 | Hong, N     | 2021 | Train    | F      | Hip fracture       | 143    | 433         | RF         | 0.7840  |             |
| 32 |             |      |          |        |                    |        |             |            |         |             |
| 33 | Hong, N     | 2021 | Train    | F      | Hip fracture       | 143    | 433         | BT         | 0.7680  |             |
| 34 |             |      |          |        |                    |        |             |            |         |             |
| 35 | Hong, N     | 2021 | Train    | F      | Hip fracture       | 143    | 433         | SVM        | 0.7590  |             |
| 36 |             |      |          |        |                    |        |             |            |         |             |
| 37 | Hong, N     | 2021 | Train    | F      | Hip fracture       | 143    | 433         | BT         | 0.7580  |             |
| 38 |             |      |          |        |                    |        |             |            |         |             |
| 39 | Hong, N     | 2021 | Test     | F      | Hip fracture       | 34     | 2029        | SM         | 0.8400  |             |
| 40 |             |      |          |        |                    |        |             |            |         |             |
| 41 |             |      |          |        |                    |        |             |            |         |             |
| 42 | Ho-Le, T. P | 2017 | Train    | F      | Hip fracture       | 54     | 700         | ANN        |         | 0.8890      |
| 43 |             |      |          |        |                    |        |             |            |         |             |
| 44 | Ho-Le, T. P | 2017 | Train    | F      | Hip fracture       | 54     | 700         | LR         |         | 0.9070      |
| 45 |             |      |          |        |                    |        |             |            |         |             |



|    | Author          | Year | Data set | Gender | Fracture site      | Events | Sample size | Model type | C-index | Sensitivity |
|----|-----------------|------|----------|--------|--------------------|--------|-------------|------------|---------|-------------|
| 1  |                 |      |          |        |                    |        |             |            |         |             |
| 2  |                 |      |          |        |                    |        |             |            |         |             |
| 3  |                 |      |          |        |                    |        |             |            |         |             |
| 4  | Ho-Le, T. P     | 2017 | Train    | F      | Hip fracture       | 54     | 700         | KNN        |         | 1.0000      |
| 5  |                 |      |          |        |                    |        |             |            |         |             |
| 6  | Ho-Le, T. P     | 2017 | Train    | F      | Hip fracture       | 54     | 700         | SVM        |         | 0.9240      |
| 7  |                 |      |          |        |                    |        |             |            |         |             |
| 8  | Ho-Le, T. P     | 2017 | Test     | F      | Hip fracture       | 36     | 467         | ANN        |         | 0.8330      |
| 9  |                 |      |          |        |                    |        |             |            |         |             |
| 10 | Ho-Le, T. P     | 2017 | Test     | F      | Hip fracture       | 36     | 467         | LR         |         | 0.7780      |
| 11 |                 |      |          |        |                    |        |             |            |         |             |
| 12 | Ho-Le, T. P     | 2017 | Test     | F      | Hip fracture       | 36     | 467         | KNN        |         | 0.8060      |
| 13 |                 |      |          |        |                    |        |             |            |         |             |
| 14 | Ho-Le, T. P     | 2017 | Test     | F      | Hip fracture       | 36     | 467         | SVM        |         | 0.8060      |
| 15 |                 |      |          |        |                    |        |             |            |         |             |
| 16 | Henry, M. J     | 2011 | Train    | F      | Multiple fractures | 125    | 600         | LR         | 0.7000  | 0.6420      |
| 17 |                 |      |          |        |                    |        |             |            |         |             |
| 18 | Galassi, A      | 2020 | Train    | F      | Hip fracture       | 62     | 96          | LR         |         | 0.7033      |
| 19 |                 |      |          |        |                    |        |             |            |         |             |
| 20 | Galassi, A      | 2020 | Train    | F      | Hip fracture       | 62     | 96          | SVM        |         | 0.9367      |
| 21 |                 |      |          |        |                    |        |             |            |         |             |
| 22 | Galassi, A      | 2020 | Train    | F      | Hip fracture       | 62     | 96          | DT         |         | 0.5967      |
| 23 |                 |      |          |        |                    |        |             |            |         |             |
| 24 | Galassi, A      | 2020 | Train    | F      | Hip fracture       | 62     | 96          | RF         |         | 0.8330      |
| 25 |                 |      |          |        |                    |        |             |            |         |             |
| 26 |                 |      |          |        |                    |        |             |            |         |             |
| 27 | FitzGerald, G   | 2014 | Train    | F      | Multiple fractures | 2638   | 47429       | SM         | 0.6670  |             |
| 28 |                 |      |          |        |                    |        |             |            |         |             |
| 29 | Ferizi, U       | 2019 | Train    | F      | Multiple fractures | 32     | 92          | BT         | 0.6400  | 0.5880      |
| 30 |                 |      |          |        |                    |        |             |            |         |             |
| 31 | Ferizi, U       | 2019 | Train    | F      | Multiple fractures | 32     | 92          | LR         | 0.6500  | 0.5490      |
| 32 |                 |      |          |        |                    |        |             |            |         |             |
| 33 | Ferizi, U       | 2019 | Train    | F      | Multiple fractures | 32     | 92          | LR         | 0.6700  | 0.5210      |
| 34 |                 |      |          |        |                    |        |             |            |         |             |
| 35 | Enns-Bray, W. S | 2019 | Train    | F      | Hip fracture       | 95     | 254         | LR         | 0.7270  |             |
| 36 |                 |      |          |        |                    |        |             |            |         |             |
| 37 | Engels, A       | 2020 | Train    | M+F    | Hip fracture       | 6115   | 20456       | LR         | 0.7140  |             |
| 38 |                 |      |          |        |                    |        |             |            |         |             |
| 39 | Engels, A       | 2020 | Train    | M+F    | Hip fracture       | 6115   | 20456       | RF         | 0.6860  |             |
| 40 |                 |      |          |        |                    |        |             |            |         |             |
| 41 | Engels, A       | 2020 | Train    | M+F    | Hip fracture       | 6115   | 20456       | SVM        | 0.6600  |             |
| 42 |                 |      |          |        |                    |        |             |            |         |             |
| 43 | Engels, A       | 2020 | Train    | M+F    | Hip fracture       | 6115   | 20456       | BT         | 0.7110  |             |
| 44 |                 |      |          |        |                    |        |             |            |         |             |

|    | Author            | Year | Data set | Gender | Fracture site      | Events | Sample size | Model type | C-index | Sensitivity |
|----|-------------------|------|----------|--------|--------------------|--------|-------------|------------|---------|-------------|
| 1  |                   |      |          |        |                    |        |             |            |         |             |
| 2  |                   |      |          |        |                    |        |             |            |         |             |
| 3  |                   |      |          |        |                    |        |             |            |         |             |
| 4  | Engels, A         | 2020 | Train    | M+F    | Hip fracture       | 6115   | 20456       | LR         | 0.7220  | 1.0000      |
| 5  | Engels, A         | 2020 | Train    | M+F    | Hip fracture       | 6115   | 20456       | BT         | 0.7250  |             |
| 6  |                   |      |          |        |                    |        |             |            |         |             |
| 7  | Engels, A         | 2020 | Test     | M+F    | Hip fracture       | 1529   | 57618       | LR         | 0.6950  | 1.0000      |
| 8  |                   |      |          |        |                    |        |             |            |         |             |
| 9  | Engels, A         | 2020 | Test     | M+F    | Hip fracture       | 1529   | 57618       | RF         | 0.6850  |             |
| 10 |                   |      |          |        |                    |        |             |            |         |             |
| 11 | Engels, A         | 2020 | Test     | M+F    | Hip fracture       | 1529   | 57618       | SVM        | 0.6500  |             |
| 12 |                   |      |          |        |                    |        |             |            |         |             |
| 13 | Engels, A         | 2020 | Test     | M+F    | Hip fracture       | 1529   | 57618       | BT         | 0.7020  |             |
| 14 |                   |      |          |        |                    |        |             |            |         |             |
| 15 | Engels, A         | 2020 | Test     | M+F    | Hip fracture       | 1529   | 57618       | LR         | 0.6980  |             |
| 16 |                   |      |          |        |                    |        |             |            |         |             |
| 17 | Engels, A         | 2020 | Test     | M+F    | Hip fracture       | 1529   | 57618       | BTt        | 0.7030  |             |
| 18 |                   |      |          |        |                    |        |             |            |         |             |
| 19 | de Vries, B. C. S | 2021 | Train    | M+F    | Multiple fractures | 805    | 7578        | SM         | 0.6970  |             |
| 20 |                   |      |          |        |                    |        |             |            |         |             |
| 21 | de Vries, B. C. S | 2021 | Train    | M+F    | Multiple fractures | 805    | 7578        | ANN        | 0.6700  |             |
| 22 |                   |      |          |        |                    |        |             |            |         |             |
| 23 | de Vries, B. C. S | 2021 | Train    | M+F    | Multiple fractures | 805    | 7578        | RF         | 0.6870  |             |
| 24 |                   |      |          |        |                    |        |             |            |         |             |
| 25 | de Vries, B. C. S | 2021 | Test     | M+F    | Multiple fractures | 165    | 1770        | SM         | 0.6250  |             |
| 26 |                   |      |          |        |                    |        |             |            |         |             |
| 27 | de Vries, B. C. S | 2021 | Test     | M+F    | Multiple fractures | 165    | 1770        | ANN        | 0.5880  |             |
| 28 |                   |      |          |        |                    |        |             |            |         |             |
| 29 | de Vries, B. C. S | 2021 | Test     | M+F    | Multiple fractures | 165    | 1770        | RF         | 0.5930  |             |
| 30 |                   |      |          |        |                    |        |             |            |         |             |
| 31 |                   |      |          |        |                    |        |             |            |         |             |
| 32 | Cheung, E. Y      | 2012 | Train    | F      | Multiple fractures | 106    | 2266        | SM         | 0.7300  | 0.8080      |
| 33 |                   |      |          |        |                    |        |             |            |         |             |
| 34 | Chanplakorn, P    | 2021 | Train    | F      | Vertebral fracture | 179    | 617         | LR         | 0.6500  | 0.4300      |
| 35 |                   |      |          |        |                    |        |             |            |         |             |
| 36 | Bredbenner, T. L  | 2014 | Train    | M      | Hip fracture       | 45     | 472         | LR         | 0.9300  |             |
| 37 |                   |      |          |        |                    |        |             |            |         |             |
| 38 | Beyaz, S          | 2020 | Train    | M+F    | Multiple fractures | 235    | 2106        | CNN        |         | 0.8250      |
| 39 |                   |      |          |        |                    |        |             |            |         |             |
| 40 | Berry, S. D       | 2018 | Train    | M      | Hip fracture       | 3541   | 119874      | SM         | 0.6922  |             |
| 41 |                   |      |          |        |                    |        |             |            |         |             |
| 42 | Berry, S. D       | 2018 | Train    | F      | Hip fracture       | 11012  | 299794      | SM         | 0.7106  |             |
| 43 |                   |      |          |        |                    |        |             |            |         |             |
| 44 |                   |      |          |        |                    |        |             |            |         |             |

|    | Author             | Year | Data set | Gender | Fracture site      | Events  | Sample size | Model type | C-index | Sensitivity |
|----|--------------------|------|----------|--------|--------------------|---------|-------------|------------|---------|-------------|
| 1  |                    |      |          |        |                    |         |             |            |         |             |
| 2  |                    |      |          |        |                    |         |             |            |         |             |
| 3  |                    |      |          |        |                    |         |             |            |         |             |
| 4  | Berry, S. D        | 2018 | Test     | M+F    | Hip fracture       | 28050   | 858636      | SM         | 0.6800  |             |
| 5  |                    |      |          |        |                    |         |             |            |         |             |
| 6  | Beaudoin, C        | 2021 | Train    | M+F    | Multiple fractures | 57678   | 307909      | SM         | 0.6810  |             |
| 7  |                    |      |          |        |                    |         |             |            |         |             |
| 8  | Beaudoin, C        | 2021 | Test     | M+F    | Multiple fractures | 21809   | 273372      | SM         | 0.6790  |             |
| 9  |                    |      |          |        |                    |         |             |            |         |             |
| 10 | Baleanu, F         | 2022 | Train    | F      | Multiple fractures | 410     | 3560        | LR         | 0.7300  |             |
| 11 |                    |      |          |        |                    |         |             |            |         |             |
| 12 | Almog, Y. A        | 2020 | Train    | M+F    | Vertebral fracture | 2468694 | 6329986     | ANN        | 0.8120  | 0.8120      |
| 13 |                    |      |          |        |                    |         |             |            |         |             |
| 14 | Almog, Y. A        | 2020 | Test     | M+F    | Vertebral fracture | 295479  | 3476219     | ANN        | 0.6680  | 0.7070      |
| 15 |                    |      |          |        |                    |         |             |            |         |             |
| 16 | Zagorski, P        | 2021 | Train    | F      | Hip fracture       | 49      | 389         | LR         | 0.8840  | 0.9390      |
| 17 |                    |      |          |        |                    |         |             |            |         |             |
| 18 | Diez-Perez, A      | 2007 | Train    | F      | Multiple fractures | 363     | 5201        | SM         | 0.6720  |             |
| 19 |                    |      |          |        |                    |         |             |            |         |             |
| 20 | Lix, L. M          | 2018 | Train    | F      | Multiple fractures | 749     | 31999       | LR         | 0.7060  |             |
| 21 |                    |      |          |        |                    |         |             |            |         |             |
| 22 | Li, Q. J           | 2021 | Train    | F      | Multiple fractures | 49      | 403         | LR         | 0.8820  |             |
| 23 |                    |      |          |        |                    |         |             |            |         |             |
| 24 | Li, Q. J           | 2021 | Test     | F      | Multiple fractures | 17      | 159         | LR         | 0.8690  |             |
| 25 |                    |      |          |        |                    |         |             |            |         |             |
| 26 | Lee, S             | 2008 | Train    | F      | Multiple fractures | 47      | 94          | SVM        |         | 0.8500      |
| 27 |                    |      |          |        |                    |         |             |            |         |             |
| 28 | Jacobs, J. W. G    | 2010 | Train    | M      | Vertebral fracture | 58      | 109         | LR         | 0.5100  |             |
| 29 |                    |      |          |        |                    |         |             |            |         |             |
| 30 | Jacobs, J. W. G    | 2010 | Train    | F      | Vertebral fracture | 98      | 205         | LR         | 0.7400  | 0.6700      |
| 31 |                    |      |          |        |                    |         |             |            |         |             |
| 32 | Eller-Vainicher, C | 2011 | Train    | F      | Vertebral fracture | 33      | 372         | LR         | 0.8230  | 0.3730      |
| 33 |                    |      |          |        |                    |         |             |            |         |             |
| 34 | Eller-Vainicher, C | 2011 | Train    | F      | Vertebral fracture | 33      | 372         | ANN        | 0.6990  | 0.7480      |
| 35 |                    |      |          |        |                    |         |             |            |         |             |
| 36 | Zhong, B. Y        | 2017 | Train    | M+F    | Vertebral fracture | 33      | 256         | SM         | 0.7800  |             |
| 37 |                    |      |          |        |                    |         |             |            |         |             |
| 38 | Zhong, B. Y        | 2017 | Test     | M+F    | Vertebral fracture | 23      | 165         | SM         | 0.7200  |             |
| 39 |                    |      |          |        |                    |         |             |            |         |             |
| 40 | Xiao, X            | 2021 | Train    | F      | Hip fracture       | 25      | 699         | SM         | 0.8040  |             |
| 41 |                    |      |          |        |                    |         |             |            |         |             |

\*M:Male;F:Female;LR: Logistic Regression;ANN:artificial ANN;SVM = support-vector machine; CNN = convolutional ANN; kNN = k-nearest neighbors; RF = random forests;DT=decision tree;BT=Boosted tree;SM=Survival model

For peer review only - <http://bmjopen.bmj.com/site/about/guidelines.xhtml>

For peer review only

1  
2  
3  
4  
5  
6  
7  
8  
9  
10  
11  
12  
13  
14  
15  
16  
17  
18  
19  
20  
21  
22  
23  
24  
25  
26  
27  
28  
29  
30  
31  
32  
33  
34  
35  
36  
37  
38  
39  
40  
41  
42  
43  
44  
45  
46  
47

**Table S4** Risk of bias assessment grading of the machine learning predictive modelling studies of osteoporosis populations as per the PROBAST criteria

|    | Study             | Participants bias | Predictors bias | Outcome bias | Analysis bias | Overall bias rating |
|----|-------------------|-------------------|-----------------|--------------|---------------|---------------------|
| 1  |                   |                   |                 |              |               |                     |
| 2  | Wu, Q             | low               | low             | low          | high          | high                |
| 3  |                   |                   |                 |              |               |                     |
| 4  | Wu, Q             | low               | low             | low          | high          | high                |
| 5  | Wu, Q             | low               | low             | low          | high          | high                |
| 6  |                   |                   |                 |              |               |                     |
| 7  | Wu, Q             | low               | low             | low          | high          | high                |
| 8  | Villamor, E       | high              | unclear         | unclear      | high          | high                |
| 9  |                   |                   |                 |              |               |                     |
| 10 | Villamor, E       | high              | unclear         | unclear      | high          | high                |
| 11 | Villamor, E       | high              | unclear         | unclear      | high          | high                |
| 12 |                   |                   |                 |              |               |                     |
| 13 | Villamor, E       | high              | low             | unclear      | high          | high                |
| 14 |                   |                   |                 |              |               |                     |
| 15 | Van Geel, Tacm    | low               | low             | low          | high          | high                |
| 16 |                   |                   |                 |              |               |                     |
| 17 | Van Geel, Tacm    | low               | low             | low          | high          | high                |
| 18 | Ulivieri, F. M    | low               | low             | low          | high          | high                |
| 19 |                   |                   |                 |              |               |                     |
| 20 | Yoda, T           | low               | low             | low          | high          | high                |
| 21 | Jiang, X. Z       | low               | low             | low          | high          | high                |
| 22 |                   |                   |                 |              |               |                     |
| 23 | Schousboe, J. T   | high              | low             | low          | unclear       | high                |
| 24 | Sandhu, S. K      | high              | unclear         | unclear      | high          | high                |
| 25 |                   |                   |                 |              |               |                     |
| 26 | Rubin, K. H       | low               | low             | low          | unclear       | unclear             |
| 27 | Pluskiewicz, W    | high              | low             | low          | unclear       | high                |
| 28 |                   |                   |                 |              |               |                     |
| 29 | Jang, E. J        | low               | low             | low          | high          | high                |
| 30 | Barret A. Monchka | high              | low             | low          | unclear       | high                |
| 31 |                   |                   |                 |              |               |                     |
| 32 | Mehta, S. D       | high              | unclear         | unclear      | high          | high                |
| 33 | Langsetmo, L      | low               | low             | low          | unclear       | unclear             |
| 34 |                   |                   |                 |              |               |                     |
| 35 | Ioannidis, G      | high              | low             | low          | unclear       | high                |
| 36 | K. K. Nishiyama   | low               | low             | low          | high          | high                |
| 37 |                   |                   |                 |              |               |                     |
| 38 | Kruse, C          | low               | low             | low          | unclear       | unclear             |
| 39 | Kruse, C          | low               | low             | low          | unclear       | unclear             |
| 40 |                   |                   |                 |              |               |                     |
| 41 | Kolanu, N         | high              | low             | low          | unclear       | high                |
| 42 | Kim, H. Y         | low               | low             | low          | unclear       | unclear             |
| 43 |                   |                   |                 |              |               |                     |
| 44 | Hsieh, C. I       | low               | low             | low          | unclear       | unclear             |

|    |                   |      |         |         |         |         |
|----|-------------------|------|---------|---------|---------|---------|
|    | Hong, N           | low  | low     | low     | unclear | unclear |
| 1  | Hong, N           | low  | low     | low     | unclear | unclear |
| 2  |                   |      |         |         |         |         |
| 3  | Hong, N           | low  | low     | low     | unclear | unclear |
| 4  | Hong, N           | low  | low     | low     | unclear | unclear |
| 5  |                   |      |         |         |         |         |
| 6  | Hong, N           | low  | low     | low     | unclear | unclear |
| 7  | Ho-Le, T. P       | low  | low     | low     | high    | high    |
| 8  | Ho-Le, T. P       | low  | low     | low     | high    | high    |
| 9  |                   |      |         |         |         |         |
| 10 | Ho-Le, T. P       | low  | low     | low     | high    | high    |
| 11 | Ho-Le, T. P       | low  | low     | low     | high    | high    |
| 12 |                   |      |         |         |         |         |
| 13 | Henry, M. J       | low  | low     | low     | unclear | unclear |
| 14 |                   |      |         |         |         |         |
| 15 | Galassi, A        | low  | low     | low     | high    | high    |
| 16 | Galassi, A        | low  | low     | low     | high    | high    |
| 17 | Galassi, A        | low  | low     | low     | high    | high    |
| 18 | Galassi, A        | low  | low     | low     | high    | high    |
| 19 | Galassi, A        | low  | low     | low     | high    | high    |
| 20 | FitzGerald, G     | low  | low     | low     | unclear | unclear |
| 21 |                   |      |         |         |         |         |
| 22 | Ferizi, U         | high | unclear | unclear | high    | high    |
| 23 | Ferizi, U         | high | unclear | unclear | high    | high    |
| 24 |                   |      |         |         |         |         |
| 25 | Ferizi, U         | high | unclear | unclear | high    | high    |
| 26 | Enns-Bray, W. S   | high | low     | low     | high    | high    |
| 27 |                   |      |         |         |         |         |
| 28 | Engels, A         | low  | low     | low     | unclear | unclear |
| 29 | Engels, A         | low  | low     | low     | unclear | unclear |
| 30 |                   |      |         |         |         |         |
| 31 | Engels, A         | low  | low     | low     | unclear | unclear |
| 32 | Engels, A         | low  | low     | low     | unclear | unclear |
| 33 |                   |      |         |         |         |         |
| 34 | Engels, A         | low  | low     | low     | unclear | unclear |
| 35 | Engels, A         | low  | low     | low     | unclear | unclear |
| 36 |                   |      |         |         |         |         |
| 37 | de Vries, B. C. S | high | low     | low     | unclear | high    |
| 38 | de Vries, B. C. S | high | low     | low     | unclear | high    |
| 39 |                   |      |         |         |         |         |
| 40 | de Vries, B. C. S | high | low     | low     | unclear | high    |
| 41 | Cheung, E. Y      | low  | low     | low     | unclear | unclear |
| 42 |                   |      |         |         |         |         |
| 43 | Chanplakorn, P    | high | low     | low     | unclear | high    |
| 44 | Bredbenner, T. L  | high | unclear | unclear | high    | high    |

|    |                    |      |         |     |         |         |
|----|--------------------|------|---------|-----|---------|---------|
|    | Beyaz, S           | high | low     | low | unclear | high    |
| 1  | Berry, S. D        | low  | low     | low | unclear | unclear |
| 2  | Beaudoin, C        | high | low     | low | unclear | high    |
| 3  |                    |      |         |     |         |         |
| 4  | Baleanu, F         | low  | low     | low | unclear | unclear |
| 5  | Baleanu, F         | low  | low     | low | unclear | unclear |
| 6  |                    |      |         |     |         |         |
| 7  | Almog, Y. A        | high | low     | low | unclear | unclear |
| 8  | Zagorski, P        | low  | low     | low | high    | high    |
| 9  |                    |      |         |     |         |         |
| 10 | Diez-Perez, A      | low  | low     | low | unclear | unclear |
| 11 | Lix, L. M          | low  | low     | low | unclear | unclear |
| 12 |                    |      |         |     |         |         |
| 13 | Li, Q. J           | high | low     | low | high    | high    |
| 14 | Lee, S             | high | unclear | low | high    | high    |
| 15 |                    |      |         |     |         |         |
| 16 | Jacobs, J. W. G    | low  | low     | low | unclear | unclear |
| 17 | Eller-Vainicher, C | low  | low     | low | high    | high    |
| 18 |                    |      |         |     |         |         |
| 19 | Eller-Vainicher, C | low  | low     | low | high    | high    |
| 20 |                    |      |         |     |         |         |
| 21 | Zhong, B. Y        | high | low     | low | high    | high    |
| 22 | Xiao, X            | low  | low     | low | high    | high    |

23 \*When a single study included multiple models, risk of bias concerns were assessed for each model.

24  
25  
26  
27  
28  
29  
30  
31  
32  
33  
34  
35  
36  
37  
38  
39  
40  
41  
42  
43  
44  
45  
46  
47

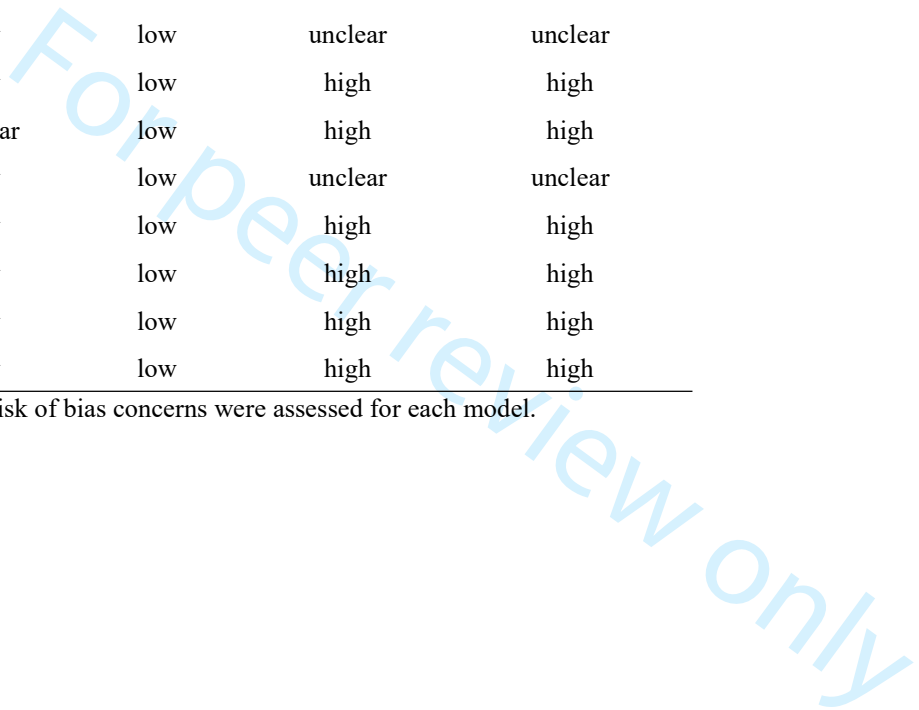

# BMJ Open

## The predictive value of machine learning on fracture risk in osteoporosis: a systematic review and meta-analysis

|                                 |                                                                                                                                                |
|---------------------------------|------------------------------------------------------------------------------------------------------------------------------------------------|
| Journal:                        | <i>BMJ Open</i>                                                                                                                                |
| Manuscript ID                   | bmjopen-2022-071430.R1                                                                                                                         |
| Article Type:                   | Original research                                                                                                                              |
| Date Submitted by the Author:   | 22-Aug-2023                                                                                                                                    |
| Complete List of Authors:       | Wu, Yanqian; Southeast University<br>Chao, Jianqian; Southeast University<br>Bao, Min; Southeast University<br>Zhang, Na; Southeast University |
| <b>Primary Subject Heading</b>: | Evidence based practice                                                                                                                        |
| Secondary Subject Heading:      | Epidemiology, Public health                                                                                                                    |
| Keywords:                       | Public health < INFECTIOUS DISEASES, Epidemiology < ONCOLOGY, Bone diseases < ORTHOPAEDIC & TRAUMA SURGERY, Systematic Review                  |
|                                 |                                                                                                                                                |

SCHOLARONE™  
Manuscripts



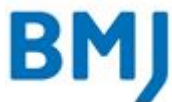

I, the Submitting Author has the right to grant and does grant on behalf of all authors of the Work (as defined in the below author licence), an exclusive licence and/or a non-exclusive licence for contributions from authors who are: i) UK Crown employees; ii) where BMJ has agreed a CC-BY licence shall apply, and/or iii) in accordance with the terms applicable for US Federal Government officers or employees acting as part of their official duties; on a worldwide, perpetual, irrevocable, royalty-free basis to BMJ Publishing Group Ltd ("BMJ") its licensees and where the relevant Journal is co-owned by BMJ to the co-owners of the Journal, to publish the Work in this journal and any other BMJ products and to exploit all rights, as set out in our [licence](#).

The Submitting Author accepts and understands that any supply made under these terms is made by BMJ to the Submitting Author unless you are acting as an employee on behalf of your employer or a postgraduate student of an affiliated institution which is paying any applicable article publishing charge ("APC") for Open Access articles. Where the Submitting Author wishes to make the Work available on an Open Access basis (and intends to pay the relevant APC), the terms of reuse of such Open Access shall be governed by a Creative Commons licence – details of these licences and which [Creative Commons](#) licence will apply to this Work are set out in our licence referred to above.

Other than as permitted in any relevant BMJ Author's Self Archiving Policies, I confirm this Work has not been accepted for publication elsewhere, is not being considered for publication elsewhere and does not duplicate material already published. I confirm all authors consent to publication of this Work and authorise the granting of this licence.

1  
2  
3  
4  
5 **The predictive value of machine learning on fracture risk in osteoporosis: a systematic review and**  
6  
7  
8 **meta-analysis**  
9

10  
11  
12  
13 Yanqian Wu<sup>1</sup>, Jianqian Chao<sup>1\*</sup>, Min Bao<sup>1</sup>, Na Zhang<sup>1</sup>  
14  
15

16  
17  
18  
19 <sup>1</sup> Key Laboratory of Environmental Medicine Engineering of Ministry of Education, School of Public Health,  
20  
21 Southeast University, Nanjing210009, P.R. China  
22  
23

24  
25  
26  
27 wyqmm0523@163.com(Yanqian Wu, PhD), chauseu@163.com (Jianqian Chao, PhD),  
28

29  
30 1689586985@qq.com(Min Bao, PhD),540923028@qq.com(Na Zhang, PhD)  
31  
32

33  
34  
35 **\*Corresponding author:** Jianqian Chao, Key Laboratory of Environmental Medicine Engineering of Ministry  
36  
37 of Education/Health Management Research Center, School of Public Health, Southeast University, 87  
38  
39 Dingjiaqiao Road, Gulou District, Nanjing 210009, China.  
40  
41

42  
43 Tel: +86 025 86424437/13813955976.  
44

45  
46 E-mail: chauseu@163.com  
47  
48  
49  
50

51 **Word count 2957.**  
52  
53  
54  
55  
56  
57  
58  
59  
60

## Abstract

**Objectives:** Early identification of fracture risk in patients with osteoporosis is essential. Machine learning (ML) has emerged as a promising technique to predict the risk, whereas its predictive performance remains controversial. Therefore, we conducted this systematic review and meta-analysis to explore the predictive efficiency of ML for the risk of fracture in patients with osteoporosis.

**Methods:** Relevant studies were retrieved from four databases (PubMed, Embase, Cochrane Library, and Web of Science) until May 31, 2023. A meta-analysis of the C-index was performed using a random-effects model, while a bivariate mixed-effects model was used for the meta-analysis of sensitivity and specificity. In addition, subgroup analysis was performed according to the types of ML models and fracture sites.

**Results:** Fifty-three studies were included in our meta-analysis, involving 15,209,268 patients, 86 prediction models specifically developed for the osteoporosis population, and 41 validation sets. The most commonly used predictors in these models encompassed age, BMI, past fracture history, bone mineral density T-score, history of falls, BMD, radiomics data, weight, height, gender, and other chronic diseases. Overall, the pooled C-index of ML was 0.75 (95% CI: 0.72,0.78) and 0.75 (95% CI: 0.71,0.78) in the training set and validation set, respectively; the pooled sensitivity was 0.79 (95% CI: 0.72,0.84) and 0.76 (95% CI: 0.80,0.81) in the training set and validation set, respectively; and the pooled specificity was 0.81 (95% CI: 0.75,0.86) and 0.83 (95% CI: 0.72,0.90) in the training set and validation set, respectively.

**Conclusions:** ML has a favorable predictive performance for fracture risk in patients with osteoporosis. However, most current studies lack external validation. Thus, external validation is required to verify the reliability of ML models.

**Keywords:** Osteoporosis; Machine learning; Fractures; Meta-Analysis

### Strengths and limitations of this study

- The latest systematic review and meta-analysis conducted to assess ML models for fracture risk.
- We performed a quantitative synthesis to enhance the comparability of ML models.
- C-index, sensitivity and specificity was performed to evaluate the performance of ML models.
- Several studies were included in the systematic review but excluded from subsequent meta-analyses.
- Most of the included studies lack external validation.

### Introduction

Osteoporosis is a systemic metabolic bone disease characterized by decreased bone mass and degraded bone microarchitecture, leading to an increased risk of bone fragility fracture (WHO,1994) [1]. Due to high disability and morbidity rates, high treatment costs, and low quality of life of patients, it has emerged as a global health concern [2]. According to the World Health Organization, osteoporosis is the second-most serious health issue after cardiovascular diseases [3]. This condition may cause fragility fractures that commonly occur in the wrist, spine, and hip. Spine and hip fractures may lead to disability, which not only affects the quality of life and longevity of patients, but also causes enormous medical expenses and a heavy burden of care [4, 5].

Machine learning (ML), a subfield of artificial intelligence, enables computers to "learn" through programs. Compared with traditional statistical methods, ML emphasizes more on the accuracy of prediction and can

1  
2  
3  
4  
5 detect regularities in multi-dimensional data sets. ML algorithms can be basically divided into supervised  
6 learning and unsupervised learning [6]. ML has been applied in the field of osteoporosis, providing a novel  
7 method for the prediction of fracture risk. A review by Ferizi et al. (2019) summarized relevant studies on the  
8 application of artificial intelligence to the prediction of osteoporosis. It drew a conclusion that ML methods for  
9 automatic image segmentation and fracture risk prediction showed a promising clinical value [7]. A systematic  
10 review by Smets et al. (2021) reviewed the state-of-the-art ML methods and their application in osteoporosis  
11 diagnosis and fracture prediction [8]. Another review by Anam et al. (2021) explored the prediction  
12 performance of magnetic resonance imaging for osteoporosis in trabecular bone from a methodology-driven and  
13 application perspective [9]. Most studies focused on the role of ML in the prediction of osteoporosis indicators,  
14 such as bone mineral density (BMD), or in the automatic segmentation of the images of patients at risk of  
15 osteoporosis. However, the efficiency of ML in predicting osteoporotic fractures is understudied.

16  
17  
18  
19  
20 The present study evaluated the predictive performance of ML for fracture risk in osteoporosis patients,  
21 providing an evidence-based medical basis for the application of ML in clinical practice.

## 22 23 24 **Materials and methods**

25 This study was conducted in accordance with the Preferred Items of Systematic Review and Meta-Analysis  
26 (PRISMA) statement (**Supplemental Table S1**) [10]. The protocol was registered on the international  
27 prospective register of systematic reviews (PROSPERO) (Registration No. CRD42022346896). Relevant  
28 studies were retrieved from Pubmed, Embase, Cochrane Library, and Web of Science, and the retrieval was as  
29 of May 31, 2023. Two researchers independently searched the literature. The search strategy is shown in  
30 **Supplemental Table S2**.

31  
32  
33 Inclusion criteria were as follows: (1) Patients were diagnosed with osteoporosis; (2) ML was applied to  
34 predict fracture risk; (3) At least one measure of model performance (discrimination or calibration) was reported;  
35 (4) Study population included adult patients older than 18 years, mainly including adults, older people, and  
36 postmenopausal women. Exclusion criteria were as follows: (1) Studies that only analyzed risk factors without  
37 building complete ML models; (2) Studies that only included osteoporosis but did not mention fracture risk; (3)  
38 Studies without available full text (or only abstract available) or data; (4) Meta-analyses, reviews, case reports,  
39 editorial materials, letters, protocols, errata, and notes.

40  
41  
42  
43 Two researchers independently extracted data using standardized tables. Any studies excluded after  
44 full-text review have been recorded with reasons for their exclusion. The list of extracted items was based on the  
45 CHARMS checklist [11], and two data extraction sheets were prepared for developed and validated models,  
46 respectively. Finally, the extracted data included the first author, year of publication, country, study design, data  
47 source, population group, gender, age, fracture sites, types of predictive models, number of predictors, and  
48 outcomes. The risk of bias was assessed using the Prediction Model Risk of Bias Assessment Tool (PROBAST).  
49 The PROBAST contained a large number of questions in four distinct domains: participants, predictors,  
50 outcomes, and statistical analysis, reflecting the overall risk of bias and applicability [12].

51  
52  
53  
54  
55  
56  
57  
58  
59  
60  
Meta-analysis of C-index, sensitivity and specificity was performed to evaluate the performance of ML  
models. If the C-index did not report 95% confidence intervals (CI) and standard errors, we estimated the  
standard errors in reference to the study by Debray TP et al. [13]. A C-index of 0.5 indicates low discrimination;  
0.6 to 0.7 indicates modest discrimination; 0.71 to 0.8 indicates very good discrimination; and greater than 0.8

1  
2  
3  
4  
5 indicates strong discrimination [14]. When original studies did not report the accuracy, we calculated it based on  
6 the sensitivity, specificity, the number of samples in each subgroup, and the number of modeling samples [13].  
7 Given the differences in variables, ML algorithms, and parameters across the studies, the random-effects model  
8 was preferred for the meta-analysis of C-index, and the bivariate mixed-effects model was used for the  
9 meta-analysis of sensitivity and specificity. Heterogeneity was quantified using  $I^2$  statistics. Sensitivity analysis  
10 was performed to further identify the source of heterogeneity by removing each study and re-calculating the  
11 pooled effect size of the remaining studies. The meta-analysis was performed using the software Stata 15.1  
12 (Stata Corporation, College Station, TX, USA) and R4.2.0 (R Development Core Team, Vienna,  
13 <http://www.R-project.org>). A  $p$  value less than 0.05 was considered statistically significant.

### 17 Patient and Public Involvement

18 No patient involved.  
19

### 21 Results

22 A total of 12,468 studies were searched from the databases, including 2409 from PubMed, 4387 from  
23 Embase, 170 from Cochrane Library, and 5502 from Web of Science. After removing duplicates and screening  
24 titles and abstracts, 378 articles remained. According to a full-text review, 53 articles [13-67] were included.  
25 Fifty-three articles presented the development of one or more prediction models for osteoporotic fracture, while  
26 twenty-six articles described the validation of one or more models. The search process is shown in **Figure 1**.

27  
28  
29 Fifty-three studies were ultimately included in our meta-analysis, involving 15,209,268 patients. Many  
30 studies originated from U. S. (n = 11), European (n = 11), and China (n = 8). Most studies were cohort studies (n  
31 = 46), and the rest were case-control studies (n = 7). The median age of osteoporosis patients was 68.8 years  
32 (ranging from 48.5 to 84). The study population in most studies covered women (n = 24). The fracture sites  
33 included multi-site (n = 26), vertebra (n = 14), hip (n = 12), and femur (n = 1). Most studies were based on  
34 clinical hospital data (n=19), while some used questionnaire collection data (n=10), osteoporosis registry data  
35 (n=9), electronic health records (n=7), and administrative data (n=6). Only 13 articles elucidated the  
36 cross-validation method. The baseline characteristics of the included studies are shown in **Supplemental Table**  
37 **S3**.  
38  
39

40  
41 There were 86 prediction models specifically developed for the osteoporosis population and 41 validation  
42 sets. Ninety-eight ML models reported the C-index or the area under the receiver operating characteristic curve  
43 (AUC), ranging from 0.50 to 0.98. **Supplemental Table S4** shows all studies on the development and validation  
44 of ML models for outcome prediction in patients with osteoporosis. Among all the identified prediction models,  
45 the logistic regression (31.4%) was the most commonly used algorithm, followed by the survival model (18%).  
46  
47

48 The most commonly used predictors in ML models were age (n=72), body mass index (BMI) (n=40), past  
49 fracture history (n=35), bone mineral density T-score (n=33), history of falls (n=29), bone mineral density  
50 (BMD) (n=28), radiomics data (n=25), weight (n=24), height (n=23), gender (n=20), and other chronic diseases  
51 (n=20) (**Table 1**).  
52  
53  
54  
55  
56  
57  
58  
59  
60

**Table 1.** Main sorts of predictors included in developed models for osteoporosis patients

| Predictors                      | Number of models |
|---------------------------------|------------------|
| <b>Demographics</b>             |                  |
| Age                             | 72               |
| History of falls                | 29               |
| Sex                             | 20               |
| Women's menopause age           | 8                |
| Family genetic history          | 6                |
| Race                            | 5                |
| <b>Physical examination</b>     |                  |
| Body mass index,BMI             | 40               |
| Bone mineral density t-score    | 33               |
| Bone mineral density, BMD       | 28               |
| Weight                          | 24               |
| Height                          | 23               |
| Motor ability                   | 10               |
| <b>Lifestyle</b>                |                  |
| Alcohol consumption             | 13               |
| Smoking                         | 11               |
| Physical activity               | 10               |
| Lack of physical exercise       | 7                |
| Daily activities                | 5                |
| Limited physical activity       | 4                |
| Frequent sun exposure           | 3                |
| <b>Comorbidity</b>              |                  |
| Past fracture history           | 35               |
| Other chronic diseases          | 20               |
| Osteoporosis                    | 8                |
| Rheumatoid arthritis            | 7                |
| Genetic risk score (GRS)        | 5                |
| Fracture type                   | 4                |
| Backache                        | 2                |
| <b>Drug and nutrient intake</b> |                  |
| Use of hormonal drugs           | 8                |
| Calcium intake                  | 8                |
| Nutritional status              | 6                |
| Intake of other drugs           | 4                |
| <b>Radiomics</b>                |                  |

|                     |                       |    |
|---------------------|-----------------------|----|
|                     | Radiomic data         | 25 |
| <b>Mental state</b> |                       |    |
|                     | Cognitive performance | 3  |
|                     | Anxiety/depression    | 2  |

Note: BMD (g/cm<sup>2</sup>)

The risk of bias assessment of the included studies is summarized in **Figure 2**. More than half of these studies had a high risk of bias (67%). The risk of bias in most studies was low in terms of participants, predictors, and outcome. However, a high or unclear risk of bias in the statistical analysis was observed in all studies. More details are shown in **Supplemental Table S5**.

Sixty-six training datasets and 32 validation datasets were included in the meta-analysis of the C-index. Since substantial heterogeneity was present, we performed subgroup analyses based on fracture site and model type. **Table 2** shows the results of the meta-analysis of C-index of ML models in predicting osteoporosis. Logistic regression is the most widely used method. The forest plot of C-index is presented in **Supplemental Figure S1 and Figure S2**. The pooled C-index was 0.75 (95 % CI: 0.72, 0.78) ( $I^2 = 99.7\%$ ,  $P < 0.001$ ) in the training set and 0.75 (95 % CI: 0.71, 0.78) ( $I^2 = 99.8\%$ ,  $P < 0.001$ ) in the validation set. In the training set, other deep learning method showed the highest predictive performance (pooled C-index = 0.97), followed by convolutional neural network (CNN) (pooled C-index = 0.94), decision trees (pooled C-index = 0.78), and logistic regression (pooled C-index = 0.75). Furthermore, models for vertebral fracture (pooled C-index = 0.80) and hip fracture (pooled C-index = 0.76) outperformed those for multi-site fracture (pooled C-index = 0.70). However, in the validation set, CNN (pooled C-index = 0.98) showed the best performance, closely followed by other deep learning method (pooled C-index = 0.82), logistic regression (pooled C-index = 0.80), and support vector machines (pooled C-index = 0.78). Models for vertebral fracture (pooled C-index = 0.87) outperformed those for hip fracture (pooled C-index = 0.73) and multi-site fracture (pooled C-index = 0.71). Across these studies, we extracted 57 estimates of balanced accuracy (the average of the reported sensitivity and specificity), ranging from 0.59 to 1.00. As presented in **Table 3**, the mean sensitivity and specificity of models were 0.79 (95 % CI: 0.72, 0.84) ( $I^2 = 99.2\%$ ,  $P < 0.001$ ) and 0.81 (95 % CI: 0.75, 0.86) in the training set ( $I^2 = 99.9\%$ ,  $P < 0.001$ ), and 0.76 (95 % CI: 0.80, 0.81) ( $I^2 = 98.9\%$ ,  $P < 0.001$ ) and 0.83 (95 % CI: 0.72, 0.90) in the validation set ( $I^2 = 99.9\%$ ,  $P < 0.001$ ), respectively. The results of sensitivity analysis show that ML models built for different fracture sites have stable performance in the training and validation sets (**Supplemental Figure S3-S8**).

**Table 2.** Results of subgroup analysis of C-index by fracture site and machine learning type

| subgroup            | Training dataset |                     | Validation dataset |                     |
|---------------------|------------------|---------------------|--------------------|---------------------|
|                     | N                | C-statistic(95% CI) | N                  | C-statistic(95% CI) |
| Fracture site       |                  |                     |                    |                     |
| Vertebral fracture  | 15               | 0.80(0.74,0.87)     | 6                  | 0.87(0.71,1.00)     |
| Hip fracture        | 20               | 0.76(0.72,0.81)     | 9                  | 0.73(0.65,0.81)     |
| Multi-site fracture | 31               | 0.70(0.67,0.72)     | 17                 | 0.71(0.65,0.76)     |
| Model type          |                  |                     |                    |                     |
| LR                  | 26               | 0.75(0.72,0.78)     | 7                  | 0.80(0.73,0.87)     |
| ANN                 | 4                | 0.73(0.64,0.82)     | 3                  | 0.66(0.62,0.70)     |
| CNN                 | 2                | 0.95(0.94,0.96)     | 1                  | 0.98(0.94,1.00)     |
| RF                  | 3                | 0.70(0.68,0.72)     | 3                  | 0.66(0.59,0.73)     |
| SVM                 | 5                | 0.72(0.60,0.85)     | 3                  | 0.78(0.59,0.96)     |
| DT                  | 2                | 0.78(0.56,0.99)     | 1                  | 0.69(0.67,0.70)     |
| NB                  | 2                | 0.74(0.39,1.00)     | -                  |                     |
| kNN                 | 1                | 0.51(0.46,0.55)     | -                  |                     |
| Survival model      | 13               | 0.70(0.69,0.74)     | 9                  | 0.68(0.67,0.69)     |
| Boosted tree        | 5                | 0.71(0.69,0.74)     | 3                  | 0.70(0.69,0.71)     |
| Ensemble learning   | 1                | 0.72(0.71,0.73)     |                    |                     |
| Other DL            | 2                | 0.97(0.96,0.97)     | 1                  | 0.82(0.77,0.87)     |
| Overall             | 66               | 0.75 (0.72,0.78)    | 32                 | 0.75(0.71,0.78)     |

Note: LR:Logistic Regression;ANN:artificial neural network;CNN: convolutional neural network;RF:random forests;SVM:support-vector machine;DT:decision tree;NB:Naive Bayes;kNN:k-nearest neighbors;DL:deep learning model.

**Table 3.** Results of subgroup analysis of sensitivity and specificity by fracture site and machine learning type

| subgroup           | Training dataset |                      |                      | Validation dataset |                      |                      |
|--------------------|------------------|----------------------|----------------------|--------------------|----------------------|----------------------|
|                    | N                | Sensitivity (95% CI) | Specificity (95% CI) | N                  | Sensitivity (95% CI) | Specificity (95% CI) |
| Fracture site      |                  |                      |                      |                    |                      |                      |
| Vertebral fracture | 10               | 0.73(0.61,0.82)      | 0.91(0.86,0.95)      | 3                  | 0.87(0.70,0.95)      | 0.97(0.94,0.98)      |
| Hip fracture       | 13               | 0.90 (0.82,0.94)     | 0.82(0.75,0.88)      | 5                  | 0.84(0.77,0.89)      | 0.85(0.80,0.89)      |



|  |                     |    |                  |                  |    |                 |                 |
|--|---------------------|----|------------------|------------------|----|-----------------|-----------------|
|  | Multi-site fracture | 18 | 0.71(0.59,0.81)  | 0.72(0.60,0.81)  | 8  | 0.66(0.61,0.70) | 0.69(0.53,0.81) |
|  | Model type          |    |                  |                  |    |                 |                 |
|  | LR                  | 17 | 0.70(0.63,0.77)  | 0.73(0.67,0.79)  | 4  | 0.66(0.55,0.75) | 0.65(0.50,0.77) |
|  | ANN                 | 4  | 0.91(0.70,0.98)  | 0.93(0.75,0.98)  | 3  | 0.78(0.71,0.83) | 0.85(0.71,0.93) |
|  | CNN                 | 3  | 0.83(0.81,0.84)  | 0.91(0.79,0.96)  | 1  | 0.98            | 0.95            |
|  | RF                  | 1  | 0.84             | 0.91             | 1  | 0.70            | 0.46            |
|  | SVM                 | 6  | 0.81(0.63,0.92)  | 0.63(0.13,0.95)  | 3  | 0.79(0.72,0.85) | 0.89(0.79,0.94) |
|  | DT                  | 2  | 0.97(0.53,1.00)  | 0.70(0.67,0.73)  | -  |                 |                 |
|  | NB                  | 2  | 0.63(0.13,0.95)  | 0.76 (0.70,0.81) | -  |                 |                 |
|  | kNN                 | 2  | 0.95 (0.39,1.00) | 0.80 (0.77,0.83) | 1  | 0.81            | 0.79            |
|  | Survival model      | 1  | 0.81             | 0.52             | -  |                 |                 |
|  | Boosted tree        | 1  | 0.59             | 0.67             | 1  | 0.70            | 0.95            |
|  | Other DL            | 2  | 0.81(0.72,0.87)  | 0.96(0.93,0.98)  | 2  | 0.83(0.74,0.90) | 0.95(0.92,0.97) |
|  | Overall             | 41 | 0.79(0.72,0.84)  | 0.81(0.75,0.86)  | 16 | 0.76(0.80,0.81) | 0.83(0.72,0.90) |

## Discussion

ML is a popular research method that provides new tools for early detection of diseases. This study systematically explored the application of the latest ML methods in predicting fracture risk in osteoporosis. The most commonly used predictors in ML models are age, BMI, past fracture history, bone mineral density T-score, history of falls, BMD, radiomics data, weight, height, gender, and other chronic diseases. In general, most predictors included in model-development studies are traditional risk factors. A recent study showed that the most common risk factors for fragility fractures encompassed decreased bone mineral density, age, gender, low BMI, history of fragility fractures, family history of hip fractures, history of glucocorticoid therapy, smoking, excessive alcohol consumption, lack of vitamin D, early menopause, and immobility [68]. This is consistent with some common fracture predictors identified in our study. Our study also finds that radiomics data are frequently used as a fracture predictor in ML models for osteoporosis. A retrospective, single-center, preliminary investigation by Lim et al. reported ML based on radiomics features and Abdomen-pelvic CT for diagnosing osteoporosis showed high predictive performance, with accuracy, specificity, and negative predictive value exceeding 93% [69].

The present study found that ML methods commonly used in the field of osteoporosis included logistic regression, decision tree, random forest, survival model, support vector machine (SVM), ensemble learning, artificial neural network (ANN), CNN, and the latest deep learning technology. ML has a good performance in the prediction and identification of osteoporosis and fracture. In terms of the models in the training sets, the prediction efficiency of other deep learning method is optimal, followed by CNN, decision trees, and logistic regression. In the validation sets, CNN showed the best performance, closely followed by other deep learning

1  
2  
3  
4  
5 method, logistic regression, and SVM. Deep learning is more powerful than traditional machine learning  
6 algorithms, with a wide range of coverage. Its performance increases with the amount of data [70]. Deep  
7 learning has been successfully applied to assist in the diagnosis and prediction of osteoporotic fractures [34, 63].  
8 CNN, a core algorithm of deep learning, is widely used in the field of data analysis and disease prediction with  
9 high accuracy [71]. CNN techniques can effectively predict the risk of osteoporotic fractures, enabling clinicians  
10 to take timely treatment measures, thereby reducing the occurrence of fractures [19, 23, 47]. Additionally,  
11 logistic regression is an efficient, simple, and easy-to-operation ML method that outputs calibrated predicted  
12 probabilities. An article on prediction models for the outcomes in patients with chronic obstructive pulmonary  
13 disease revealed that logistic regression was the most frequently used modeling method [72]. This is the same as  
14 recent findings reported by Kushan et al. [73]. Their ML models based on logistic regression outperformed  
15 those based on random forest and decision trees. Moreover, SVM adapts well to small samples and  
16 high-dimensional data with a low misclassification rate, and therefore can be used for classification and  
17 regression analysis [74].

18  
19  
20  
21  
22  
23 Most included studies report multiple outcomes, such as sensitivity, specificity, AUC, and ROC. The mean  
24 sensitivity of the models in the training set model is 0.79 (95 % CI: 0.72, 0.84), greater than that of the models  
25 in the validation set. Most models are internally validated in the same population database and lack external  
26 validations in other populations. Only ML models in six articles were externally validated [32, 34, 36, 48, 55,  
27 67]. Therefore, external validations of ML models for predicting fracture risk are needed. However, a single  
28 performance measure such as AUC or ROC is insufficient to recommend the application of ML models into  
29 clinical practice [8], and multiple measures of performance should be combined.

30  
31  
32 This systematic review and meta-analysis summarized a large number of studies to comprehensively  
33 evaluate the predictive performance of ML for fracture risk in patients with osteoporosis. The characteristics of  
34 the established and validated models were described. We performed a quantitative synthesis that was never done  
35 in previous studies to compare these models. Furthermore, the meta-analysis of C-index was performed using  
36 the random-effects model, since the C-index was reported in most predictive models [72, 75]. Meanwhile, the  
37 bivariate mixed-effects model was used for the meta-analysis of sensitivity and specificity. In the training  
38 dataset, the sensitivity of hip fracture was the highest, closely followed by multi-site fracture and vertebral  
39 fracture. For patients with hip fractures, radiographs may cause missed diagnosis and misdiagnosis, leading to  
40 poor prognosis [76]. ML models have been increasingly used to identify hip fracture risk with high accuracy  
41 [31]. ML has a stronger power to recognize images and can assist inexperienced clinicians in a highly accurate  
42 diagnosis.

43  
44  
45  
46  
47 Some limitations still need to be considered in the present study. Due to incomplete reporting of indicators,  
48 several studies were only included in the systematic review and were excluded from subsequent meta-analyses  
49 [61, 63]. Studies conducted in either Western or Asian populations lack external validation, and thus external  
50 validations in other populations are needed to widen the application of ML models. The risk of bias assessment  
51 demonstrated that most studies ( 67% ) had a high risk of bias, regardless of whether they involved the  
52 development or external validation of a prediction model for the osteoporosis population. The main bias came  
53 from the statistical analysis, because most studies did not properly handle continuous and categorical variables  
54 and reported no method for processing missing values. Only three articles reported the use of median imputation  
55  
56  
57  
58  
59  
60

1  
2  
3  
4  
5 or multiple interpolation method to deal with missing values [15, 31, 66], while others did not mention how to  
6 deal with missing values. These shortcomings in the methodology may be due to a lack of guidelines for the  
7 standard reporting of risk prediction studies at that time. In addition, some models were reported with little  
8 information, making it unable for other researchers to perform external validation, much less the application in  
9 clinical practice. For example, only 12 articles used the K-fold cross-validation method to improve the accuracy  
10 of their algorithms [15, 16, 19, 27, 30, 31, 34, 36, 42, 46, 47, 62], but most of the eligible articles did not.  
11 Models without stringent validation cannot be widely applied [73]. Many studies have limited applicability in  
12 clinical practice because of flawed methodologies or unrepresentative data sets. Future research should give  
13 priority to the development of practical algorithms. Furthermore, we observed large heterogeneity in the  
14 meta-analysis of C statistics. Potential sources of heterogeneity may be the differences in patients'  
15 characteristics, data sources, and analysis methods across the studies. More than 30% of the research data came  
16 from clinical studies, and clinical data are heterogeneous and usually imbalanced. At last, most ML models did  
17 not report balanced accuracy and lacked calibration or external validation or decision curves. Thus, further  
18 research is required to address these issues, improving the generalization of the models.

19  
20  
21  
22  
23  
24 Despite the limitations mentioned above, the present study can still provide meaningful recommendations  
25 for future research and practice. First, the major strength of our study is the rigorous literature search and  
26 methodology to provide reliable estimates. This is the latest systematic review and meta-analysis conducted to  
27 comprehensively assess ML models for fracture risk. Second, ML models can provide convincing evidence to  
28 assist clinicians in making more accurate judgments during highly complex decision-making processes, with  
29 certain clinical application values[74]. More rigorous, robust, and comprehensive research is warranted to assess  
30 its clinical application and impact on clinicians and patients. Third, the advances in emerging technologies such  
31 as ML have opened a new era of clinical medical research, providing new directions for solving intricate  
32 problems with classical statistical methods. However, clinicians currently are not skillful in using such emerging  
33 technologies. Therefore, it is advisable for clinicians to improve their ability to use ML to make more accurate  
34 diagnoses.

35  
36  
37  
38  
39 In conclusion, ML has a favorable predictive performance for fracture risk in patients with osteoporosis  
40 and can be used as a potential tool for early identification of fracture risk in this population. However, most  
41 current studies lack external validation. Therefore, future research is needed to validate and improve the existing  
42 predictive models for osteoporosis risk rather than developing new models.

#### 43 44 45 **Declarations**

#### 46 ***Funding***

47 This work was supported by National Natural Science Foundation of China (81872711), Postgraduate Research  
48 & Practice Innovation Program of Jiangsu Province ( KYCX23\_0328).

#### 49 50 51 ***Authors Contributions***

52 Yanqian Wu and Jianqian Chao designed the review, developed the inclusion criteria, screened titles and  
53 abstracts, appraised the quality of included papers, and drafted the manuscript. Min Bao and Na Zhang collected  
54 and cleaned the data, also analysed the data. All authors critically reviewed drafts and approved the final  
55  
56  
57  
58  
59  
60

manuscript.

### **Competing interests**

Yanqian Wu, Jianqian Chao, Min Bao and Na Zhang declare that they have no conflict of interest.

### **Ethical Approval**

This study does not involve human participants and ethical approval was not required.

### **Data sharing statement**

Data are available upon reasonable request. Data may be obtained from the corresponding author and are not publicly available.

### **References**

- 1 Kanis JA. Assessment of fracture risk and its application to screening for postmenopausal osteoporosis: synopsis of a WHO report. WHO Study Group. *Osteoporos Int* 1994;4(6):368-81. doi: 10.1007/bf01622200
- 2 Veronese N, Kolk H, Maggi S. Epidemiology of Fragility Fractures and Social Impact. In: Falaschi P, Marsh D, editors. *Orthogeriatrics: The Management of Older Patients with Fragility Fractures*. Cham (CH): Springer  
Copyright 2021, The Author(s). 2021. p. 19-34.
- 3 Piscitelli P, Feola M, Rao C, *et al.* Ten years of hip fractures in Italy: For the first time a decreasing trend in elderly women. *World J Orthop* 2014;5(3):386-91. doi: 10.5312/wjo.v5.i3.386
- 4 Borgström F, Karlsson L, Ortsäter G, *et al.* Fragility fractures in Europe: burden, management and opportunities. *Arch Osteoporos* 2020;15(1):59. doi: 10.1007/s11657-020-0706-y
- 5 Zimmermann EA, Busse B, Ritchie RO. The fracture mechanics of human bone: influence of disease and treatment. *Bonekey Rep* 2015;4:743. doi: 10.1038/bonekey.2015.112
- 6 Gupta R, Srivastava D, Sahu M, *et al.* Artificial intelligence to deep learning: machine intelligence approach for drug discovery. *Mol Divers* 2021;25(3):1315-60. doi: 10.1007/s11030-021-10217-3
- 7 Ferizi U, Honig S, Chang G. Artificial intelligence, osteoporosis and fragility fractures. *Curr Opin Rheumatol* 2019;31(4):368-75. doi: 10.1097/bor.0000000000000607
- 8 Smets J, Shevroja E, Hügle T, *et al.* Machine Learning Solutions for Osteoporosis-A Review. *J Bone Miner Res* 2021;36(5):833-51. doi: 10.1002/jbmr.4292
- 9 Anam M, Ponnusamy V-ap, Hussain M, *et al.* Osteoporosis Prediction for Trabecular Bone using Machine Learning: A Review. *Computers, Materials & Continua* 2021;67(1):89--105. doi: 10.32604/cmc.2021.013159
- 10 Liberati A, Altman DG, Tetzlaff J, *et al.* The PRISMA statement for reporting systematic reviews and meta-analyses of studies that evaluate health care interventions: explanation and elaboration. *PLoS Med* 2009;6(7):e1000100. doi: 10.1371/journal.pmed.1000100

- 1
- 2
- 3
- 4
- 5 11 Palazón-Bru A, Martín-Pérez F, Mares-García E, *et al.* A general presentation on how to carry out a
- 6 CHARMS analysis for prognostic multivariate models. *Stat Med* 2020;39(23):3207-25. doi:
- 7 10.1002/sim.8660
- 8
- 9 12 Nagendran M, Chen Y, Lovejoy CA, *et al.* Artificial intelligence versus clinicians: systematic review of
- 10 design, reporting standards, and claims of deep learning studies. *Bmj* 2020;368:m689. doi:
- 11 10.1136/bmj.m689
- 12
- 13 13 Debray TP, Damen JA, Riley RD, *et al.* A framework for meta-analysis of prediction model studies with
- 14 binary and time-to-event outcomes. *Stat Methods Med Res* 2019;28(9):2768-86. doi:
- 15 10.1177/0962280218785504
- 16
- 17 14 Snell KI, Ensor J, Debray TP, *et al.* Meta-analysis of prediction model performance across multiple studies:
- 18 Which scale helps ensure between-study normality for the C-statistic and calibration measures? *Stat*
- 19 *Methods Med Res* 2018;27(11):3505-22. doi: 10.1177/0962280217705678
- 20
- 21 15 Wu Q, Nasoz F, Jung J, *et al.* Machine Learning Approaches for Fracture Risk Assessment: A Comparative
- 22 Analysis of Genomic and Phenotypic Data in 5130 Older Men. *Calcif Tissue Int* 2020;107(4):353-61. doi:
- 23 10.1007/s00223-020-00734-y
- 24
- 25 16 Villamor E, Monserrat C, Del Río L, *et al.* Prediction of osteoporotic hip fracture in postmenopausal
- 26 women through patient-specific FE analyses and machine learning. *Comput Methods Programs Biomed*
- 27 2020;193:105484. doi: 10.1016/j.cmpb.2020.105484
- 28
- 29 17 van Geel TA, Nguyen ND, Geusens PP, *et al.* Development of a simple prognostic nomogram for
- 30 individualising 5-year and 10-year absolute risks of fracture: a population-based prospective study among
- 31 postmenopausal women. *Ann Rheum Dis* 2011;70(1):92-7. doi: 10.1136/ard.2010.131813
- 32
- 33 18 Ulivieri FM, Rinaudo L, Piodi LP, *et al.* Bone strain index as a predictor of further vertebral fracture in
- 34 osteoporotic women: An artificial intelligence-based analysis. *PLoS One* 2021;16(2):e0245967. doi:
- 35 10.1371/journal.pone.0245967
- 36
- 37 19 Yoda T, Maki S, Furuya T, *et al.* Automated Differentiation Between Osteoporotic Vertebral Fracture and
- 38 Malignant Vertebral Fracture on MRI Using a Deep Convolutional Neural Network. *Spine (Phila Pa 1976)*
- 39 2022;47(8):E347-e52. doi: 10.1097/brs.0000000000004307
- 40
- 41 20 Jiang X, Westermann LB, Galleo GV, *et al.* Age as a predictor of osteoporotic fracture compared with
- 42 current risk-prediction models. *Obstet Gynecol* 2013;122(5):1040-46. doi:
- 43 10.1097/AOG.0b013e3182a7e29b
- 44
- 45 21 Schousboe JT, Rosen HR, Vokes TJ, *et al.* Prediction models of prevalent radiographic vertebral fractures
- 46 among older women. *J Clin Densitom* 2014;17(3):378-85. doi: 10.1016/j.jocd.2013.09.021
- 47
- 48 22 Sandhu SK, Nguyen ND, Center JR, *et al.* Prognosis of fracture: evaluation of predictive accuracy of the
- 49 FRAX algorithm and Garvan nomogram. *Osteoporos Int* 2010;21(5):863-71. doi:
- 50 10.1007/s00198-009-1026-7
- 51
- 52 23 Rubin KH, Möller S, Holmberg T, *et al.* A New Fracture Risk Assessment Tool (FREM) Based on Public
- 53 Health Registries. *J Bone Miner Res* 2018;33(11):1967-79. doi: 10.1002/jbmr.3528
- 54
- 55 24 Pluskiewicz W, Adamczyk P, Franek E, *et al.* Ten-year probability of osteoporotic fracture in 2012 Polish
- 56 women assessed by FRAX and nomogram by Nguyen *et al.*-Conformity between methods and their clinical
- 57 utility. *Bone* 2010;46(6):1661-7. doi: 10.1016/j.bone.2010.02.012
- 58
- 59
- 60

- 1  
2  
3  
4  
5 25 Jang EJ, Lee YK, Choi HJ, *et al.* Osteoporotic Fracture Risk Assessment Using Bone Mineral Density in  
6 Korean: A Community-based Cohort Study. *J Bone Metab* 2016;23(1):34-9. doi:  
7 10.11005/jbm.2016.23.1.34  
8  
9 26 Monchka BA, Kimelman D, Lix LM, *et al.* Feasibility of a generalized convolutional neural network for  
10 automated identification of vertebral compression fractures: The Manitoba Bone Mineral Density Registry.  
11 *Bone* 2021;150:116017. doi: 10.1016/j.bone.2021.116017  
12  
13 27 Mehta SD, Sebros R. Computer-Aided Detection of Incidental Lumbar Spine Fractures from Routine  
14 Dual-Energy X-Ray Absorptiometry (DEXA) Studies Using a Support Vector Machine (SVM) Classifier.  
15 *J Digit Imaging* 2020;33(1):204-10. doi: 10.1007/s10278-019-00224-0  
16  
17 28 Langsetmo L, Nguyen TV, Nguyen ND, *et al.* Independent external validation of nomograms for predicting  
18 risk of low-trauma fracture and hip fracture. *Cmaj* 2011;183(2):E107-14. doi: 10.1503/cmaj.100458  
19  
20 29 Ioannidis G, Jantzi M, Bucek J, *et al.* Development and validation of the Fracture Risk Scale (FRS) that  
21 predicts fracture over a 1-year time period in institutionalised frail older people living in Canada: an  
22 electronic record-linked longitudinal cohort study. *BMJ Open* 2017;7(9):e016477. doi:  
23 10.1136/bmjopen-2017-016477  
24  
25 30 Nishiyama KK, Macdonald HM, Hanley DA, *et al.* Women with previous fragility fractures can be  
26 classified based on bone microarchitecture and finite element analysis measured with HR-pQCT.  
27 *Osteoporos Int* 2013;24(5):1733-40. doi: 10.1007/s00198-012-2160-1  
28  
29 31 Kruse C, Eiken P, Vestergaard P. Machine Learning Principles Can Improve Hip Fracture Prediction.  
30 *Calcif Tissue Int* 2017;100(4):348-60. doi: 10.1007/s00223-017-0238-7  
31  
32 32 Kolanu N, Brown AS, Beech A, *et al.* Natural language processing of radiology reports for the  
33 identification of patients with fracture. *Arch Osteoporos* 2021;16(1):6. doi: 10.1007/s11657-020-00859-5  
34  
35 33 Kim HY, Jang EJ, Park B, *et al.* Development of a Korean Fracture Risk Score (KFRS) for Predicting  
36 Osteoporotic Fracture Risk: Analysis of Data from the Korean National Health Insurance Service. *PLoS*  
37 *One* 2016;11(7):e0158918. doi: 10.1371/journal.pone.0158918  
38  
39 34 Hsieh CI, Zheng K, Lin C, *et al.* Automated bone mineral density prediction and fracture risk assessment  
40 using plain radiographs via deep learning. *Nat Commun* 2021;12(1):5472. doi:  
41 10.1038/s41467-021-25779-x  
42  
43 35 Hong N, Park H, Kim CO, *et al.* Bone Radiomics Score Derived From DXA Hip Images Enhances Hip  
44 Fracture Prediction in Older Women. *J Bone Miner Res* 2021;36(9):1708-16. doi: 10.1002/jbmr.4342  
45  
46 36 Ho-Le TP, Center JR, Eisman JA, *et al.* Prediction of hip fracture in post-menopausal women using  
47 artificial neural network approach. *Annu Int Conf IEEE Eng Med Biol Soc* 2017;2017:4207-10. doi:  
48 10.1109/embc.2017.8037784  
49  
50 37 Henry MJ, Pasco JA, Merriman EN, *et al.* Fracture risk score and absolute risk of fracture. *Radiology*  
51 2011;259(2):495-501. doi: 10.1148/radiol.10101406  
52  
53 38 Galassi A, Martín-Guerrero JD, Villamor E, *et al.* Risk Assessment of Hip Fracture Based on Machine  
54 Learning. *Appl Bionics Biomech* 2020;2020:8880786. doi: 10.1155/2020/8880786  
55  
56 39 FitzGerald G, Compston JE, Chapurlat RD, *et al.* Empirically based composite fracture prediction model  
57 from the Global Longitudinal Study of Osteoporosis in Postmenopausal Women (GLOW). *J Clin*  
58 *Endocrinol Metab* 2014;99(3):817-26. doi: 10.1210/jc.2013-3468  
59  
60

- 1  
2  
3  
4  
5 40 Ferizi U, Besser H, Hysi P, *et al.* Artificial Intelligence Applied to Osteoporosis: A Performance  
6 Comparison of Machine Learning Algorithms in Predicting Fragility Fractures From MRI Data. *J Magn*  
7 *Reson Imaging* 2019;49(4):1029-38. doi: 10.1002/jmri.26280
- 8  
9 41 Enns-Bray WS, Bahaloo H, Fleps I, *et al.* Biofidelic finite element models for accurately classifying hip  
10 fracture in a retrospective clinical study of elderly women from the AGES Reykjavik cohort. *Bone*  
11 2019;120:25-37. doi: 10.1016/j.bone.2018.09.014
- 12  
13 42 Engels A, Reber KC, Lindlbauer I, *et al.* Osteoporotic hip fracture prediction from risk factors available in  
14 administrative claims data - A machine learning approach. *PLoS One* 2020;15(5):e0232969. doi:  
15 10.1371/journal.pone.0232969
- 16  
17 43 de Vries BCS, Hegeman JH, Nijmeijer W, *et al.* Comparing three machine learning approaches to design a  
18 risk assessment tool for future fractures: predicting a subsequent major osteoporotic fracture in fracture  
19 patients with osteopenia and osteoporosis. *Osteoporos Int* 2021;32(3):437-49. doi:  
20 10.1007/s00198-020-05735-z
- 21  
22 44 Cheung EY, Bow CH, Cheung CL, *et al.* Discriminative value of FRAX for fracture prediction in a cohort  
23 of Chinese postmenopausal women. *Osteoporos Int* 2012;23(3):871-8. doi: 10.1007/s00198-011-1647-5
- 24  
25 45 Chanplakorn P, Lertudomphonwanit T, Daraphongsataporn N, *et al.* Development of prediction model for  
26 osteoporotic vertebral compression fracture screening without using clinical risk factors, compared with  
27 FRAX and other previous models. *Arch Osteoporos* 2021;16(1):84. doi: 10.1007/s11657-021-00957-y
- 28  
29 46 Bredbenner TL, Mason RL, Havill LM, *et al.* Fracture risk predictions based on statistical shape and  
30 density modeling of the proximal femur. *J Bone Miner Res* 2014;29(9):2090-100. doi: 10.1002/jbmr.2241
- 31  
32 47 Beyaz S, Açıcı K, Sümer E. Femoral neck fracture detection in X-ray images using deep learning and  
33 genetic algorithm approaches. *Jt Dis Relat Surg* 2020;31(2):175-83. doi: 10.5606/ehc.2020.72163
- 34  
35 48 Berry SD, Zullo AR, Lee Y, *et al.* Fracture Risk Assessment in Long-term Care (FRAiL): Development  
36 and Validation of a Prediction Model. *J Gerontol A Biol Sci Med Sci* 2018;73(6):763-69. doi:  
37 10.1093/gerona/glx147
- 38  
39 49 Beaudoin C, Jean S, Moore L, *et al.* Prediction of Osteoporotic Fractures in Elderly Individuals: A  
40 Derivation and Internal Validation Study Using Healthcare Administrative Data. *J Bone Miner Res*  
41 2021;36(12):2329-42. doi: 10.1002/jbmr.4438
- 42  
43 50 Baleanu F, Moreau M, Charles A, *et al.* Fragility Fractures in Postmenopausal Women: Development of  
44 5-Year Prediction Models Using the FRISBEE Study. *J Clin Endocrinol Metab* 2022;107(6):e2438-e48.  
45 doi: 10.1210/clinem/dgac092
- 46  
47 51 Almog YA, Rai A, Zhang P, *et al.* Deep Learning With Electronic Health Records for Short-Term Fracture  
48 Risk Identification: Crystal Bone Algorithm Development and Validation. *J Med Internet Res*  
49 2020;22(10):e22550. doi: 10.2196/22550
- 50  
51 52 Zagórski P, Tabor E, Martela-Tomaszek K, *et al.* Five-year fracture risk assessment in postmenopausal  
52 women, using both the POL-RISK calculator and the Garvan nomogram: the Silesia Osteo Active Study.  
53 *Arch Osteoporos* 2021;16(1):32. doi: 10.1007/s11657-021-00881-1
- 54  
55 53 Díez-Pérez A, González-Macías J, Marín F, *et al.* Prediction of absolute risk of non-spinal fractures using  
56 clinical risk factors and heel quantitative ultrasound. *Osteoporos Int* 2007;18(5):629-39. doi:  
57 10.1007/s00198-006-0297-5
- 58  
59  
60

- 1  
2  
3  
4  
5 54 Lix LM, Leslie WD, Majumdar SR. Measuring improvement in fracture risk prediction for a new risk  
6 factor: a simulation. *BMC Res Notes* 2018;11(1):62. doi: 10.1186/s13104-018-3178-z
- 7  
8 55 Li Q, Long X, Wang Y, *et al.* Development and validation of a nomogram for predicting the probability of  
9 new vertebral compression fractures after vertebral augmentation of osteoporotic vertebral compression  
10 fractures. *BMC Musculoskelet Disord* 2021;22(1):957. doi: 10.1186/s12891-021-04845-x
- 11  
12 56 Lee S, Lee JW, Jeong JW, *et al.* A preliminary study on discrimination of osteoporotic fractured group  
13 from nonfractured group using support vector machine. *Annu Int Conf IEEE Eng Med Biol Soc*  
14 2008;2008:474-7. doi: 10.1109/iembs.2008.4649193
- 15  
16 57 Jacobs JW, Da Silva JA, Armbrecht G, *et al.* Prediction of vertebral fractures is specific for gender and site  
17 of bone mineral density measurement. *J Rheumatol* 2010;37(1):149-54. doi: 10.3899/jrheum.090731
- 18  
19 58 Eller-Vainicher C, Chiodini I, Santi I, *et al.* Recognition of morphometric vertebral fractures by artificial  
20 neural networks: analysis from GISMO Lombardia Database. *PLoS One* 2011;6(11):e27277. doi:  
21 10.1371/journal.pone.0027277
- 22  
23 59 Zhong BY, He SC, Zhu HD, *et al.* Risk Prediction of New Adjacent Vertebral Fractures After PVP for  
24 Patients with Vertebral Compression Fractures: Development of a Prediction Model. *Cardiovasc Intervent*  
25 *Radiol* 2017;40(2):277-84. doi: 10.1007/s00270-016-1492-1
- 26  
27 60 Xiao X, Wu Q. The Utility of Genetic Risk Score to Improve Performance of FRAX for Fracture  
28 Prediction in US Postmenopausal Women. *Calcif Tissue Int* 2021;108(6):746-56. doi:  
29 10.1007/s00223-021-00809-4
- 30  
31 61 Du J, Wang J, Gai X, *et al.* Application of intelligent X-ray image analysis in risk assessment of  
32 osteoporotic fracture of femoral neck in the elderly. *Math Biosci Eng* 2023;20(1):879-93. doi:  
33 10.3934/mbe.2023040
- 34  
35 62 Wang M, Chen X, Cui W, *et al.* A Computed Tomography-based Radiomics Nomogram for Predicting  
36 Osteoporotic Vertebral Fractures: A Longitudinal Study. *J Clin Endocrinol Metab* 2023;108(6):e283-e94.  
37 doi: 10.1210/clinem/dgac722
- 38  
39 63 Dong Q, Luo G, Lane NE, *et al.* Deep Learning Classification of Spinal Osteoporotic Compression  
40 Fractures on Radiographs using an Adaptation of the Genant Semiquantitative Criteria. *Acad Radiol*  
41 2022;29(12):1819-32. doi: 10.1016/j.acra.2022.02.020
- 42  
43 64 Wen Z, Mo X, Zhao S, *et al.* Study on Risk Factors of Primary Non-traumatic OVCF in Chinese Elderly  
44 and a Novel Prediction Model. *Orthop Surg* 2022;14(11):2925-38. doi: 10.1111/os.13531
- 45  
46 65 Pluskiewicz W, Adamczyk P, Werner A, *et al.* POL-RISK: an algorithm for 10-year fracture risk prediction  
47 in postmenopausal women from the RAC-OST-POL study. *Pol Arch Intern Med* 2023;133(3). doi:  
48 10.20452/pamw.16395
- 49  
50 66 Kong XK, Zhao ZY, Zhang D, *et al.* Major osteoporosis fracture prediction in type 2 diabetes: a derivation  
51 and comparison study. *Osteoporos Int* 2022;33(9):1957-67. doi: 10.1007/s00198-022-06425-8
- 52  
53 67 Agarwal A, Baleanu F, Moreau M, *et al.* External validation of FRISBEE 5-year fracture prediction  
54 models: a registry-based cohort study. *Arch Osteoporos* 2022;18(1):13. doi: 10.1007/s11657-022-01205-7
- 55  
56 68 Pisani P, Renna MD, Conversano F, *et al.* Major osteoporotic fragility fractures: Risk factor updates and  
57 societal impact. *World J Orthop* 2016;7(3):171-81. doi: 10.5312/wjo.v7.i3.171
- 58  
59  
60



- 1  
2  
3  
4  
5 69 Lim HK, Ha HI, Park SY, *et al.* Prediction of femoral osteoporosis using machine-learning analysis with  
6 radiomics features and abdomen-pelvic CT: A retrospective single center preliminary study. *PLoS One*  
7 2021;16(3):e0247330. doi: 10.1371/journal.pone.0247330  
8  
9 70 Avci O, Abdeljaber O, Kiranyaz S, *et al.* A review of vibration-based damage detection in civil structures:  
10 From traditional methods to Machine Learning and Deep Learning applications. *Mechanical Systems and*  
11 *Signal Processing* 2021;147:107077. doi: 10.1016/j.ymssp.2020.107077  
12  
13 71 Shen SC, Peña Fernández M, Tozzi G, *et al.* Deep learning approach to assess damage mechanics of bone  
14 tissue. *J Mech Behav Biomed Mater* 2021;123:104761. doi: 10.1016/j.jmbbm.2021.104761  
15  
16 72 Bellou V, Belbasis L, Konstantinidis AK, *et al.* Prognostic models for outcome prediction in patients with  
17 chronic obstructive pulmonary disease: systematic review and critical appraisal. *Bmj* 2019;367:l5358. doi:  
18 10.1136/bmj.l5358  
19  
20 73 Silva K, Lee WK, Forbes A, *et al.* Use and performance of machine learning models for type 2 diabetes  
21 prediction in community settings: A systematic review and meta-analysis. *Int J Med Inform*  
22 2020;143:104268. doi: 10.1016/j.ijmedinf.2020.104268  
23  
24 74 Jain R, Sontisirikit S, Iamsirithaworn S, *et al.* Prediction of dengue outbreaks based on disease  
25 surveillance, meteorological and socio-economic data. *BMC Infect Dis* 2019;19(1):272. doi:  
26 10.1186/s12879-019-3874-x  
27  
28 75 Fleuren LM, Klausch TLT, Zwager CL, *et al.* Machine learning for the prediction of sepsis: a systematic  
29 review and meta-analysis of diagnostic test accuracy. *Intensive Care Med* 2020;46(3):383-400. doi:  
30 10.1007/s00134-019-05872-y  
31  
32 76 Hossain M, Akbar SA, Andrew G. Misdiagnosis of occult hip fracture is more likely in patients with poor  
33 mobility and cognitive impairment. *Acta Orthop Belg* 2010;76(3):341-6.  
34

### 35 **Figure legends**

36 **Figure 1** The flow chart of retrieval process

37  
38 **Figure 2** Risk of bias assessment (using PROBAST) based on four domains across

39  
40 all machine learning models  
41  
42  
43  
44  
45  
46  
47  
48  
49  
50  
51  
52  
53  
54  
55  
56  
57  
58  
59  
60

## Identification of studies via databases and registers

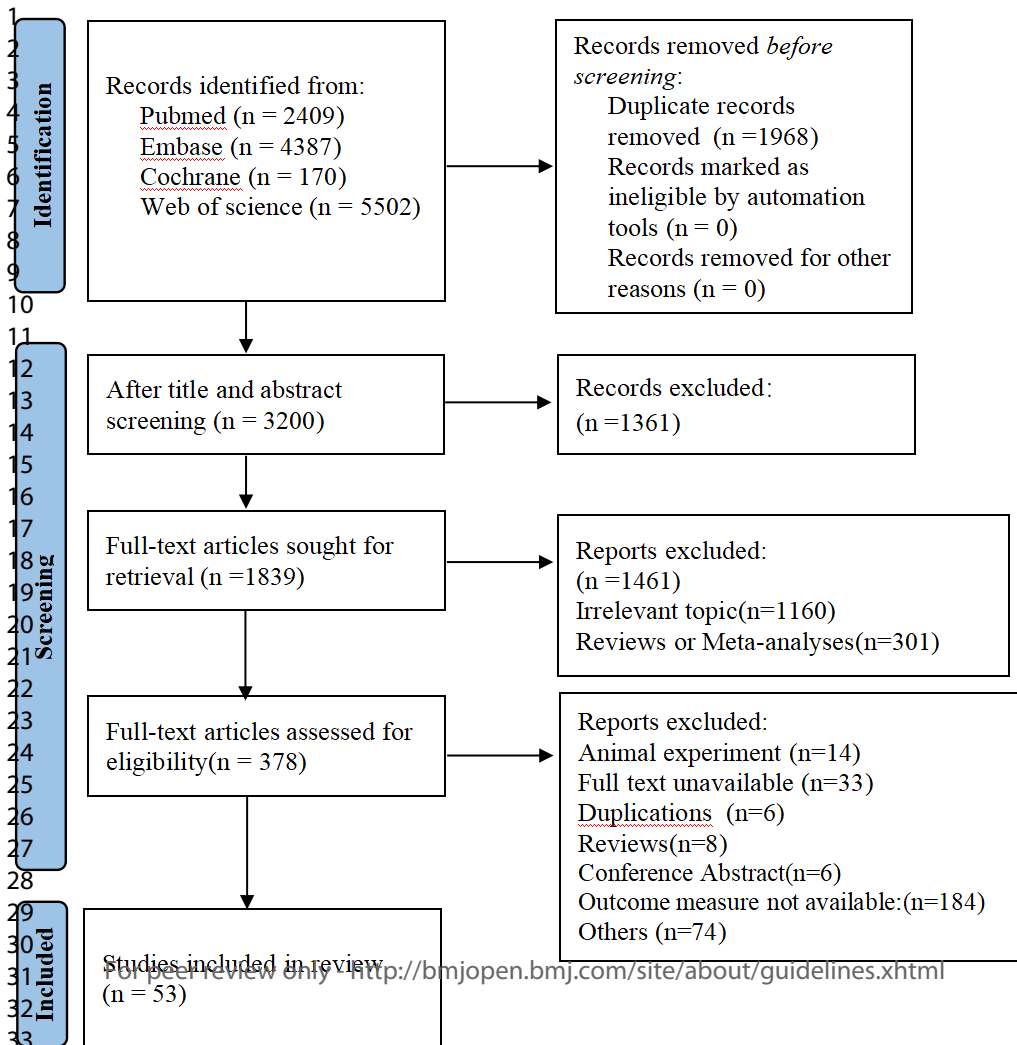

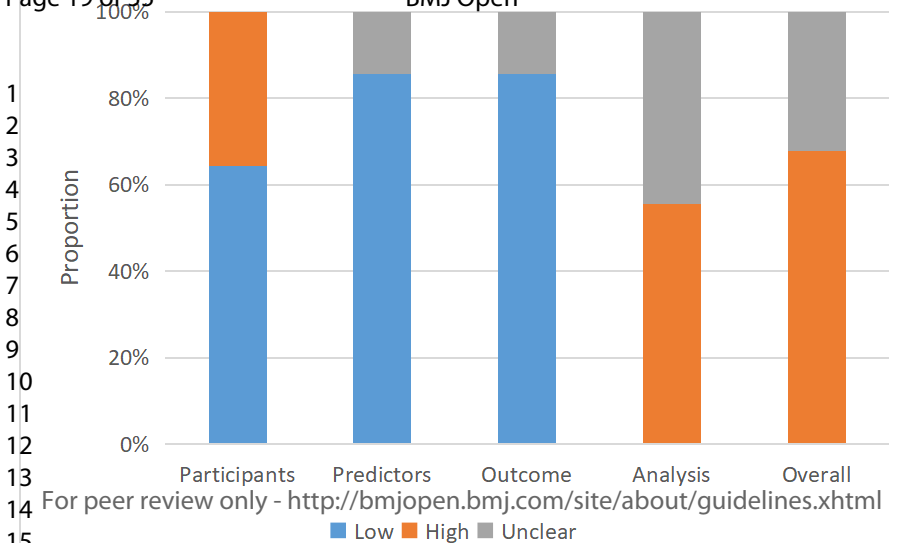

For peer review only - <http://bmjopen.bmj.com/site/about/guidelines.xhtml>

Low High Unclear

Table S1 : PRISMA 2020 checklist

| Section and Topic       | Item # | Checklist item                                                                                                                                                                                                                                                                                       | Location where item is reported |
|-------------------------|--------|------------------------------------------------------------------------------------------------------------------------------------------------------------------------------------------------------------------------------------------------------------------------------------------------------|---------------------------------|
| <b>TITLE</b>            |        |                                                                                                                                                                                                                                                                                                      |                                 |
| Title                   | 1      | Identify the report as a systematic review.                                                                                                                                                                                                                                                          | 1                               |
| <b>ABSTRACT</b>         |        |                                                                                                                                                                                                                                                                                                      |                                 |
| Abstract                | 2      | See the PRISMA 2020 for Abstracts checklist.                                                                                                                                                                                                                                                         | 2                               |
| <b>INTRODUCTION</b>     |        |                                                                                                                                                                                                                                                                                                      |                                 |
| Rationale               | 3      | Describe the rationale for the review in the context of existing knowledge.                                                                                                                                                                                                                          | 2-3                             |
| Objectives              | 4      | Provide an explicit statement of the objective(s) or question(s) the review addresses.                                                                                                                                                                                                               | 3                               |
| <b>METHODS</b>          |        |                                                                                                                                                                                                                                                                                                      |                                 |
| Eligibility criteria    | 5      | Specify the inclusion and exclusion criteria for the review and how studies were grouped for the syntheses.                                                                                                                                                                                          | 3                               |
| Information sources     | 6      | Specify all databases, registers, websites, organisations, reference lists and other sources searched or consulted to identify studies. Specify the date when each source was last searched or consulted.                                                                                            | 3                               |
| Search strategy         | 7      | Present the full search strategies for all databases, registers and websites, including any filters and limits used.                                                                                                                                                                                 | Table S2                        |
| Selection process       | 8      | Specify the methods used to decide whether a study met the inclusion criteria of the review, including how many reviewers screened each record and each report retrieved, whether they worked independently, and if applicable, details of automation tools used in the process.                     | 3, Figure 1                     |
| Data collection process | 9      | Specify the methods used to collect data from reports, including how many reviewers collected data from each report, whether they worked independently, any processes for obtaining or confirming data from study investigators, and if applicable, details of automation tools used in the process. | 3                               |
| Data items              | 10a    | List and define all outcomes for which data were sought. Specify whether all results that were compatible with each outcome domain in each study were sought (e.g. for all measures, time points,                                                                                                    | 3                               |

**Table S1 : PRISMA 2020 checklist**

| Section and Topic             | Item # | Checklist item                                                                                                                                                                                                                                                    | Location where item is reported |
|-------------------------------|--------|-------------------------------------------------------------------------------------------------------------------------------------------------------------------------------------------------------------------------------------------------------------------|---------------------------------|
|                               |        | analyses), and if not, the methods used to decide which results to collect.                                                                                                                                                                                       |                                 |
|                               | 10b    | List and define all other variables for which data were sought (e.g. participant and intervention characteristics, funding sources). Describe any assumptions made about any missing or unclear information.                                                      | Table S3, Table S4              |
| Study risk of bias assessment | 11     | Specify the methods used to assess risk of bias in the included studies, including details of the tool(s) used, how many reviewers assessed each study and whether they worked independently, and if applicable, details of automation tools used in the process. | 3-4, Figure 2                   |
| Effect measures               | 12     | Specify for each outcome the effect measure(s) (e.g. risk ratio, mean difference) used in the synthesis or presentation of results.                                                                                                                               | 4                               |
| Synthesis methods             | 13a    | Describe the processes used to decide which studies were eligible for each synthesis (e.g. tabulating the study intervention characteristics and comparing against the planned groups for each synthesis (item #5)).                                              | 4                               |
|                               | 13b    | Describe any methods required to prepare the data for presentation or synthesis, such as handling of missing summary statistics, or data conversions.                                                                                                             | 4                               |
|                               | 13c    | Describe any methods used to tabulate or visually display results of individual studies and syntheses.                                                                                                                                                            | 4                               |
|                               | 13d    | Describe any methods used to synthesize results and provide a rationale for the choice(s). If meta-analysis was performed, describe the model(s), method(s) to identify the presence and extent of statistical heterogeneity, and software package(s) used.       | 3-4                             |
|                               | 13e    | Describe any methods used to explore possible causes of heterogeneity among study results (e.g. subgroup analysis, meta-regression).                                                                                                                              | Table 2, Table 3                |
|                               | 13f    | Describe any sensitivity analyses conducted to assess robustness of the synthesized results.                                                                                                                                                                      | 3                               |
| Reporting bias                | 14     | Describe any methods used to assess risk of bias due to missing results in a synthesis (arising from                                                                                                                                                              | 3                               |

Table S1 : PRISMA 2020 checklist

| Section and Topic             | Item # | Checklist item                                                                                                                                                                                                                                                                       | Location where item is reported |
|-------------------------------|--------|--------------------------------------------------------------------------------------------------------------------------------------------------------------------------------------------------------------------------------------------------------------------------------------|---------------------------------|
| assessment                    |        | reporting biases).                                                                                                                                                                                                                                                                   |                                 |
| Certainty assessment          | 15     | Describe any methods used to assess certainty (or confidence) in the body of evidence for an outcome.                                                                                                                                                                                | 4                               |
| <b>RESULTS</b>                |        |                                                                                                                                                                                                                                                                                      |                                 |
| Study selection               | 16a    | Describe the results of the search and selection process, from the number of records identified in the search to the number of studies included in the review, ideally using a flow diagram.                                                                                         | 4                               |
|                               | 16b    | Cite studies that might appear to meet the inclusion criteria, but which were excluded, and explain why they were excluded.                                                                                                                                                          | Figure 1                        |
| Study characteristics         | 17     | Cite each included study and present its characteristics.                                                                                                                                                                                                                            | 4, Table S3                     |
| Risk of bias in studies       | 18     | Present assessments of risk of bias for each included study.                                                                                                                                                                                                                         | 6, Figure 2, Table S5           |
| Results of individual studies | 19     | For all outcomes, present, for each study: (a) summary statistics for each group (where appropriate) and (b) an effect estimate and its precision (e.g. confidence/credible interval), ideally using structured tables or plots.                                                     | 6, Table 2, Table 3             |
| Results of syntheses          | 20a    | For each synthesis, briefly summarise the characteristics and risk of bias among contributing studies.                                                                                                                                                                               | 6                               |
|                               | 20b    | Present results of all statistical syntheses conducted. If meta-analysis was done, present for each the summary estimate and its precision (e.g. confidence/credible interval) and measures of statistical heterogeneity. If comparing groups, describe the direction of the effect. | 6, Table 2                      |
|                               | 20c    | Present results of all investigations of possible causes of heterogeneity among study results.                                                                                                                                                                                       | 6-7, Table 2                    |
|                               | 20d    | Present results of all sensitivity analyses conducted to assess the robustness of the synthesized results.                                                                                                                                                                           | 6-8, Table 3                    |
| Reporting biases              | 21     | Present assessments of risk of bias due to missing results (arising from reporting biases) for each synthesis assessed.                                                                                                                                                              | 6, Figure 2                     |
| Certainty of evidence         | 22     | Present assessments of certainty (or confidence) in the body of evidence for each outcome assessed.                                                                                                                                                                                  | Table 2, Table 3                |

Table S1 : PRISMA 2020 checklist

| Section and Topic                              | Item # | Checklist item                                                                                                                                                                                                                             | Location where item is reported         |
|------------------------------------------------|--------|--------------------------------------------------------------------------------------------------------------------------------------------------------------------------------------------------------------------------------------------|-----------------------------------------|
| <b>DISCUSSION</b>                              |        |                                                                                                                                                                                                                                            |                                         |
| Discussion                                     | 23a    | Provide a general interpretation of the results in the context of other evidence.                                                                                                                                                          | 8-10                                    |
|                                                | 23b    | Discuss any limitations of the evidence included in the review.                                                                                                                                                                            | 8-10                                    |
|                                                | 23c    | Discuss any limitations of the review processes used.                                                                                                                                                                                      | 8-10                                    |
|                                                | 23d    | Discuss implications of the results for practice, policy, and future research.                                                                                                                                                             | 10                                      |
| <b>OTHER INFORMATION</b>                       |        |                                                                                                                                                                                                                                            |                                         |
| Registration and protocol                      | 24a    | Provide registration information for the review, including register name and registration number, or state that the review was not registered.                                                                                             | 4,Registration No. CRD42022346896       |
|                                                | 24b    | Indicate where the review protocol can be accessed, or state that a protocol was not prepared.                                                                                                                                             | The protocol was registered on PROSPERO |
|                                                | 24c    | Describe and explain any amendments to information provided at registration or in the protocol.                                                                                                                                            | NA                                      |
| Support                                        | 25     | Describe sources of financial or non-financial support for the review, and the role of the funders or sponsors in the review.                                                                                                              | 10                                      |
| Competing interests                            | 26     | Declare any competing interests of review authors.                                                                                                                                                                                         | 11                                      |
| Availability of data, code and other materials | 27     | Report which of the following are publicly available and where they can be found: template data collection forms; data extracted from included studies; data used for all analyses; analytic code; any other materials used in the review. | Table S3, Table S4                      |

From: Page MJ, McKenzie JE, Bossuyt PM, Boutron I, Hoffmann TC, Mulrow CD, et al. The PRISMA 2020 statement: an updated guideline for reporting systematic reviews. *BMJ* 2021;372:n71. doi: 10.1136/bmj.n71

**Table S2** Literature search strategy**1.Pubmed**

| Search number | Query                                                                                                                                                                                                                                                                                                                                                                                                                                                                                                                                                                                                                                                | Results |
|---------------|------------------------------------------------------------------------------------------------------------------------------------------------------------------------------------------------------------------------------------------------------------------------------------------------------------------------------------------------------------------------------------------------------------------------------------------------------------------------------------------------------------------------------------------------------------------------------------------------------------------------------------------------------|---------|
| #1            | "Osteoporosis"[Mesh]                                                                                                                                                                                                                                                                                                                                                                                                                                                                                                                                                                                                                                 | 62,328  |
| #2            | "Osteoporosis"[Title/Abstract] OR "Osteoporoses"[Title/Abstract] OR "bone loss age related"[Title/Abstract] OR "age related bone loss"[Title/Abstract] OR "age related bone losses"[Title/Abstract] OR "bone loss age related"[Title/Abstract] OR (((("bone and bones"[MeSH Terms] OR ("Bone"[All Fields] AND "bones"[All Fields]) OR "bone and bones"[All Fields] OR "Bone"[All Fields]) AND "Losses"[All Fields]) AND "Age-Related"[Title/Abstract])                                                                                                                                                                                               | 82,879  |
| #3            | "Osteoporosis"[MeSH Terms] OR ("Osteoporosis"[Title/Abstract] OR "Osteoporoses"[Title/Abstract] OR "bone loss age related"[Title/Abstract] OR "age related bone loss"[Title/Abstract] OR "age related bone losses"[Title/Abstract] OR "bone loss age related"[Title/Abstract] OR (((("bone and bones"[MeSH Terms] OR ("Bone"[All Fields] AND "bones"[All Fields]) OR "bone and bones"[All Fields] OR "Bone"[All Fields]) AND "Losses"[All Fields]) AND "Age-Related"[Title/Abstract]))                                                                                                                                                               | 100,673 |
| #4            | "Machine Learning"[Mesh]                                                                                                                                                                                                                                                                                                                                                                                                                                                                                                                                                                                                                             | 55,536  |
| #5            | "machine learning"[Title/Abstract] OR "transfer learning"[Title/Abstract] OR "deep learning"[Title/Abstract] OR "prediction model"[Title/Abstract] OR "artificial intelligence"[Title/Abstract] OR "random forest"[Title/Abstract] OR "artificial neural network"[Title/Abstract] OR "ANN"[Title/Abstract] OR "support vector machine"[Title/Abstract] OR "SVM"[Title/Abstract] OR "gradient boosting machine"[Title/Abstract] OR "GBM"[Title/Abstract] OR "Nomogram"[Title/Abstract] OR "XGboost"[Title/Abstract] OR "Logistic"[Title/Abstract] OR "decision tree"[Title/Abstract] OR "external validation"[Title/Abstract]OR "cox"[Title/Abstract] | 708,017 |
| #6            | "Machine Learning"[MeSH Terms] OR "Machine Learning"[Title/Abstract] OR "transfer learning"[Title/Abstract] OR "deep learning"[Title/Abstract] OR "prediction model"[Title/Abstract] OR "artificial intelligence"[Title/Abstract] OR "random forest"[Title/Abstract] OR "artificial neural network"[Title/Abstract] OR "ANN"[Title/Abstract] OR "support vector machine"[Title/Abstract] OR                                                                                                                                                                                                                                                          | 869,928 |



|     |                                                                                                                                                                                                                                                                                            |         |
|-----|--------------------------------------------------------------------------------------------------------------------------------------------------------------------------------------------------------------------------------------------------------------------------------------------|---------|
|     | "SVM"[Title/Abstract] OR "gradient boosting machine"[Title/Abstract] OR "GBM"[Title/Abstract] OR "Nomogram"[Title/Abstract] OR "XGboost"[Title/Abstract] OR "Logistic"[Title/Abstract] OR "decision tree"[Title/Abstract] OR "external validation"[Title/Abstract]OR "cox"[Title/Abstract] |         |
| #7  | "fractures, bone"[MeSH]                                                                                                                                                                                                                                                                    | 299,700 |
| #8  | "fractures bone"[Title/Abstract] OR "broken bones"[Title/Abstract] OR "bone broken"[Title/Abstract] OR "bones broken"[Title/Abstract] OR "broken bone"[Title/Abstract] OR "Fractures"[Title/Abstract] OR "Fracture"[Title/Abstract]                                                        | 343,051 |
| #9  | "fractures, bone"[MeSH Terms] OR "fractures bone"[Title/Abstract] OR "broken bones"[Title/Abstract] OR "bone broken"[Title/Abstract] OR "bones broken"[Title/Abstract] OR "broken bone"[Title/Abstract] OR "Fractures"[Title/Abstract] OR "Fracture"[Title/Abstract]                       | 325,361 |
| #10 | #3AND #6 AND #9                                                                                                                                                                                                                                                                            | 2,409   |

2.Cochrane

| Search number | Query                                                                                                                                                             | Results |
|---------------|-------------------------------------------------------------------------------------------------------------------------------------------------------------------|---------|
| #1            | MeSH descriptor: [Osteoporosis] explode all trees                                                                                                                 | 5,754   |
| #2            | (Osteoporosis):ti,ab,kw OR (Osteoporoses):ti,ab,kw OR (Bone Loss, Age-Related):ti,ab,kw OR (Age-Related Bone Loss):ti,ab,kw OR (Age-Related Bone Losses):ti,ab,kw | 11,868  |
| #3            | (Bone Loss, Age Related):ti,ab,kw OR (Bone Losses, Age-Related):ti,ab,kw                                                                                          | 549     |
| #4            | #1 OR #2 OR #3                                                                                                                                                    | 12,188  |
| #5            | MeSH descriptor: [Machine Learning] explode all trees                                                                                                             | 866     |
| #6            | (machine learning):ti,ab,kw OR (Transfer Learning):ti,ab,kw OR (Deep learning):ti,ab,kw OR (Prediction model):ti,ab,kw OR (artificial intelligence):ti,ab,kw      | 10,742  |
| #7            | (random forest):ti,ab,kw OR (artificial neural network):ti,ab,kw OR (ANN):ti,ab,kw OR (Support vector machine):ti,ab,kw OR (SVM):ti,ab,kw                         | 3,194   |
| #8            | (Gradient Boosting Machine):ti,ab,kw OR (GBM):ti,ab,kw OR (Nomogram):ti,ab,kw OR (XGboost):ti,ab,kw OR (Logistic):ti,ab,kw                                        | 32,161  |

|     |                                                                                                                                        |        |
|-----|----------------------------------------------------------------------------------------------------------------------------------------|--------|
| #9  | (Decision tree):ti,ab,kw OR (External validation):ti,ab,kw                                                                             | 2,025  |
| #10 | #5 OR #6 OR #7 OR #8 OR #9                                                                                                             | 43,070 |
| #11 | MeSH descriptor: [Fractures, Bone] explode all trees                                                                                   | 8,166  |
| #12 | (Fractures, Bone):ti,ab,kw OR (Broken Bones):ti,ab,kw OR (Bone, Broken):ti,ab,kw OR (Bones, Broken):ti,ab,kw OR (Broken Bone):ti,ab,kw | 9,471  |
| #13 | (Fractures):ti,ab,kw OR (Fracture):ti,ab,kw                                                                                            | 27,252 |
| #14 | #11 OR #12 OR #13                                                                                                                      | 27,386 |
| #15 | #4 AND #10 AND #14                                                                                                                     | 170    |

### 3.Embase

| Search number | Query                                                                                                                                                                                                                                                                                                                                                                                                                                                 | Results   |
|---------------|-------------------------------------------------------------------------------------------------------------------------------------------------------------------------------------------------------------------------------------------------------------------------------------------------------------------------------------------------------------------------------------------------------------------------------------------------------|-----------|
| #1            | 'osteoporosis'/exp                                                                                                                                                                                                                                                                                                                                                                                                                                    | 152,054   |
| #2            | 'osteoporosis':ab,ti OR 'osteoporoses':ab,ti OR 'bone loss, age-related':ab,ti OR 'age-related bone loss':ab,ti OR 'age-related bone losses':ab,ti OR 'bone loss, age related':ab,ti OR 'bone losses, age-related':ab,ti                                                                                                                                                                                                                              | 121,472   |
| #3            | #1 OR #2                                                                                                                                                                                                                                                                                                                                                                                                                                              | 176,124   |
| #4            | 'machine learning'/exp                                                                                                                                                                                                                                                                                                                                                                                                                                | 377,384   |
| #5            | 'machine learning':ab,ti OR 'transfer learning':ab,ti OR 'deep learning':ab,ti OR 'prediction model':ab,ti OR 'artificial intelligence':ab,ti OR 'random forest':ab,ti OR 'artificial neural network':ab,ti OR ann:ab,ti OR 'support vector machine':ab,ti OR svm:ab,ti OR 'gradient boosting machine':ab,ti OR gbm:ab,ti OR nomogram:ab,ti OR xgboost:ab,ti OR logistic:ab,ti OR 'decision tree':ab,ti OR 'external validation':ab,ti OR 'cox':ab,ti | 1,265,200 |
| #6            | #4 OR #5                                                                                                                                                                                                                                                                                                                                                                                                                                              | 1,485,765 |
| #7            | 'fracture'/exp                                                                                                                                                                                                                                                                                                                                                                                                                                        | 383,399   |
| #8            | 'fractures, bone':ab,ti OR 'broken bones':ab,ti OR 'bone, broken':ab,ti OR 'bones, broken':ab,ti OR 'broken bone':ab,ti OR 'fractures':ab,ti OR 'fracture':ab,ti                                                                                                                                                                                                                                                                                      | 363,644   |

|     |                  |         |
|-----|------------------|---------|
| #9  | #7 OR #8         | 471,174 |
| #10 | #3 AND #6 AND #9 | 4,387   |

**4. Web of science**

| Search number | Query                                                                                                                                                                                                                                                                                                                                                                                                                                                             | Results   |
|---------------|-------------------------------------------------------------------------------------------------------------------------------------------------------------------------------------------------------------------------------------------------------------------------------------------------------------------------------------------------------------------------------------------------------------------------------------------------------------------|-----------|
| #1            | Osteoporosis (Topic) or Osteoporoses (Topic) or Bone Loss, Age-Related (Topic) or Age-Related Bone Loss (Topic) or Age-Related Bone Losses (Topic) or Bone Loss, Age Related (Topic) or Bone Losses, Age-Related (Topic)                                                                                                                                                                                                                                          | 210,210   |
| #2            | machine learning (Topic) or Transfer Learning (Topic) or Deep learning (Topic) or Prediction model (Topic) or artificial intelligence (Topic) or random forest (Topic) or artificial neural network (Topic) or ANN (Topic) or Support vector machine (Topic) or SVM (Topic) or Gradient Boosting Machine (Topic) or GBM (Topic) or Nomogram (Topic) or XGboost (Topic) or Logistic (Topic) or Decision tree (Topic) or External validation (Topic) or Cox (Topic) | 3,698,410 |
| #3            | Fractures, Bone (Topic) or Broken Bones (Topic) or Bone, Broken (Topic) or Bones, Broken (Topic) or Broken Bone (Topic) or Fractures (Topic) or Fracture (Topic)                                                                                                                                                                                                                                                                                                  | 1,302,805 |
| #4            | #1 AND #2 AND #3                                                                                                                                                                                                                                                                                                                                                                                                                                                  | 5,502     |

**Table S3** Characteristics of included studies in meta-analysis

| Author              | Year | Country     | Data source              | Sample population type | Mean age, years | Fracture site | Total sample, n | Validation Method | ML method                   | Model evaluation metrics                      |
|---------------------|------|-------------|--------------------------|------------------------|-----------------|---------------|-----------------|-------------------|-----------------------------|-----------------------------------------------|
| Wu, Q[15]           | 2020 | USA         | gene database            | men                    | 74.8            | multiple      | 5130            | internal          | LR<br>ANN<br>RF<br>BT<br>LR | AUC<br>Sensitivity<br>Specificity<br>Accuracy |
| Villamor, E[16]     | 2020 | Spain       | clinical hospital        | women                  | 81.4            | hip           | 137             | internal          | SVM<br>ANN<br>RF            | Accuracy                                      |
| Van Geel, Tacm[17]  | 2011 | Netherlands | questionnaire collection | women                  | 62              | vertebral     | 2372            | -                 | SM                          | AUC                                           |
| Ulivieri, F. M[18]  | 2021 | Italy       | clinical hospital        | patient                | 48.5            | vertebral     | 90              | -                 | ANN                         | Sensitivity<br>Specificity<br>Accuracy<br>ROC |
| Yoda, T[19]         | 2021 | Japan       | clinical hospital        | patient                | 77.6            | vertebral     | 97              | internal          | CNN                         | AUC<br>Sensitivity<br>Specificity             |
| Jiang, X. Z[20]     | 2013 | USA         | clinical hospital        | women                  | 61.4            | multiple      | 615             | -                 | LR                          | AUC<br>Sensitivity<br>Specificity<br>Accuracy |
| Schousboe, J. T[21] | 2014 | USA         | clinical hospital        | women                  | 75              | vertebral     | 7233            | -                 | LR                          | AUC<br>ROC                                    |
| Sandhu, S. K[22]    | 2010 | Australia   | electronic health record | patient                | 74              | multiple      | 200             | -                 | LR                          | AUC<br>ROC                                    |
| Rubin, K. H[23]     | 2018 | Denmark     | administrative           | subjects               | 61.4            | multiple      | 2495339         | internal          | LR                          | Accuracy<br>PPV<br>NPV<br>ROC<br>AUC          |
| Pluskiewicz, W[24]  | 2010 | Poland      | osteoporosis registry    | women                  | 68.5            | multiple      | 2012            | -                 | LR                          | ROC<br>AUC                                    |
| Jang, E. J[25]      | 2016 | Korea       | questionnaire collection | subjects               | 61              | multiple      | 768             | -                 | LR                          | C-statistics                                  |



|    |                       |      |                 |                          |         |      |           |       |          |                   |              |
|----|-----------------------|------|-----------------|--------------------------|---------|------|-----------|-------|----------|-------------------|--------------|
| 1  |                       |      |                 |                          |         |      |           |       |          | BT                |              |
| 2  |                       |      |                 |                          |         |      |           |       |          | SVM               |              |
| 3  |                       |      |                 |                          |         |      |           |       |          | ANN               |              |
| 4  |                       |      |                 |                          |         |      |           |       |          | LR                | AUC          |
| 5  |                       |      |                 |                          |         |      |           |       |          | kNN               | Sensitivity  |
| 6  | Ho-Le, T. P[36]       | 2017 | Australia       | osteoporosis registry    | women   | 69.1 | hip       | 1167  | external | SVM               | Specificity  |
| 7  |                       |      |                 |                          |         |      |           |       |          |                   |              |
| 8  |                       |      |                 |                          |         |      |           |       |          |                   |              |
| 9  |                       |      |                 |                          |         |      |           |       |          |                   |              |
| 10 | Henry, M. J[37]       | 2011 | Australia       | osteoporosis registry    | women   | 74   | multiple  | 600   | -        | LR                | AUC          |
| 11 |                       |      |                 |                          |         |      |           |       |          |                   | ROC          |
| 12 |                       |      |                 |                          |         |      |           |       |          |                   | Sensitivity  |
| 13 |                       |      |                 |                          |         |      |           |       |          |                   | Specificity  |
| 14 | Galassi, A[38]        | 2020 | Spain           | electronic health record | women   | 81.4 | hip       | 137   | internal | DT                | Sensitivity  |
| 15 |                       |      |                 |                          |         |      |           |       |          | LR                | Specificity  |
| 16 |                       |      |                 |                          |         |      |           |       |          | RF                | Accuracy     |
| 17 | FitzGerald, G[39]     | 2014 | California      | questionnaire collection | women   | 67   | multiple  | 47429 | -        | SVM               |              |
| 18 |                       |      |                 |                          |         |      |           |       |          | SM                | C-statistics |
| 19 |                       |      |                 |                          |         |      |           |       |          |                   |              |
| 20 | Ferizi, U[40]         | 2019 | USA             | osteoporosis registry    | women   | 62   | multiple  | 92    | -        | LR                | AUC          |
| 21 |                       |      |                 |                          |         |      |           |       |          | BT                | ROC          |
| 22 |                       |      |                 |                          |         |      |           |       |          | kNN               | Sensitivity  |
| 23 |                       |      |                 |                          |         |      |           |       |          | SVM               | Specificity  |
| 24 | Enns-Bray, W. S[41]   | 2019 | USA             | clinical hospital        | women   | 77.2 | hip       | 254   | -        | NB                |              |
| 25 |                       |      |                 |                          |         |      |           |       |          | LR                | AUC          |
| 26 |                       |      |                 |                          |         |      |           |       |          |                   | ROC          |
| 27 |                       |      |                 |                          |         |      |           |       |          | SVM               |              |
| 28 | Engels, A[42]         | 2020 | Germany         | administrative           | patient | 75.6 | hip       | 78074 | internal | RF                |              |
| 29 |                       |      |                 |                          |         |      |           |       |          | LR                | AUC          |
| 30 |                       |      |                 |                          |         |      |           |       |          | Ensemble learning | ROC          |
| 31 |                       |      |                 |                          |         |      |           |       |          |                   |              |
| 32 | De Vries, B. C. S[43] | 2021 | The Netherlands | clinical hospital        | patient | 68   | multiple  | 9348  | internal | BT                |              |
| 33 |                       |      |                 |                          |         |      |           |       |          | ANN               | C-statistics |
| 34 |                       |      |                 |                          |         |      |           |       |          | RF                |              |
| 35 |                       |      |                 |                          |         |      |           |       |          | SM                |              |
| 36 | Cheung, E. Y[44]      | 2012 | China           | electronic health record | women   | 62   | multiple  | 2266  | -        |                   | AUC          |
| 37 |                       |      |                 |                          |         |      |           |       |          |                   | ROC          |
| 38 |                       |      |                 |                          |         |      |           |       |          |                   | Sensitivity  |
| 39 | Chanplakorn, P[45]    | 2021 | Thailand        | osteoporosis registry    | women   | 68.5 | vertebral | 617   | -        |                   | Specificity  |
| 40 | Bredbenner, T.        | 2014 | USA             | clinical hospital        | men     | 65   | hip       | 922   | internal | SM                | AUC          |
| 41 |                       |      |                 |                          |         |      |           |       |          | LR                | ROC          |
| 42 |                       |      |                 |                          |         |      |           |       |          |                   | AUC          |

|  |                        |      |          |                          |          |      |           |         |                       |           |                                                        |
|--|------------------------|------|----------|--------------------------|----------|------|-----------|---------|-----------------------|-----------|--------------------------------------------------------|
|  | L[46]                  |      |          |                          |          |      |           |         |                       |           | ROC<br>AUC<br>ROC                                      |
|  | Beyaz, S[47]           | 2020 | Turkey   | osteoporosis registry    | patient  | 74.9 | multiple  | 2106    | -                     | ANN       | Sensitivity<br>Specificity<br>Accuracy<br>C-statistics |
|  | Berry, S. D[48]        | 2018 | USA      | administrative           | subjects | 84   | hip       | 1278304 | external              | SM        | C-statistics                                           |
|  | Beaudoin, C[49]        | 2021 | Canada   | administrative           | subjects | 75.1 | multiple  | 581281  | internal              | SM        | C-statistics                                           |
|  | Baleanu, F[50]         | 2022 | Belgium  | clinical hospital        | women    | 70.1 | multiple  | 3560    | -                     | LR        | AUC<br>ROC<br>AUC<br>ROC                               |
|  | Almog, Y. A[51]        | 2020 | USA      | electronic health record | patient  | 50   | vertebral | 9806205 | internal              | ANN       | Sensitivity<br>Specificity<br>AUC<br>ROC               |
|  | Zagorski, P[52]        | 2021 | Poland   | questionnaire collection | women    | 65.2 | hip       | 389     | -                     | LR        | Sensitivity<br>Specificity<br>PPV<br>NPV<br>AUC<br>ROC |
|  | Diez-Perez, A[53]      | 2007 | Spain    | questionnaire collection | women    | 72.3 | multiple  | 5201    | -                     | SM        | AUC<br>ROC                                             |
|  | Lix, L. M[54]          | 2018 | Canada   | osteoporosis registry    | women    | 65.6 | multiple  | 31999   | -                     | LR        | AUC<br>ROC                                             |
|  | Li, Q. J[55]           | 2021 | China    | clinical hospital        | patient  | 70   | multiple  | 562     | internal and external | LR        | C-statistics                                           |
|  | Lee, S[56]             | 2008 | Korea    | osteoporosis registry    | women    | 65   | multiple  | 94      | -                     | SVM       | Sensitivity<br>Specificity<br>AUC<br>ROC               |
|  | Jacobs, J. W. G[57]    | 2010 | Portugal | questionnaire collection | subjects | 66   | vertebral | 314     | -                     | LR        | Sensitivity<br>Specificity<br>AUC<br>ROC               |
|  | Eller-Vainicher, C[58] | 2011 | Italy    | questionnaire collection | women    | 68   | vertebral | 372     | -                     | ANN<br>LR | Sensitivity<br>Specificity                             |

|                        |      |        |                             |          |      |           |      |          |                      |  |                                                                                             |
|------------------------|------|--------|-----------------------------|----------|------|-----------|------|----------|----------------------|--|---------------------------------------------------------------------------------------------|
|                        |      |        |                             |          |      |           |      |          |                      |  | Accuracy                                                                                    |
| Zhong, B.<br>Y[59]     | 2017 | China  | clinical hospital           | patient  | 72   | vertebral | 421  | internal | SM                   |  | C-statistics                                                                                |
| Xiao, X[60]            | 2021 | USA    | gene database               | women    | 64.5 | hip       | 699  | -        | SM<br>SVM            |  | AUC                                                                                         |
| Du, J[61]              | 2022 | China  | clinical hospital           | subjects | 71   | femur     | 120  | -        | RF<br>DT<br>AdaBoost |  | Accuracy<br>Specificity<br>Recall                                                           |
| Wang, M[62]            | 2022 | China  | clinical hospital           | subjects | 73.4 | vertebral | 7906 | -        | ANN<br>XGBoost<br>SM |  | Precision                                                                                   |
| Dong, Q[63]            | 2022 | USA    | clinical hospital           | men      | 73.7 | vertebral | 3792 | internal | Other DL             |  | AUC<br>AUC<br>ROC<br>Sensitivity<br>Specificity<br>PPV<br>NPV<br>FDR<br>F1 score            |
| Wen, Z[64]             | 2022 | China  | clinical hospital           | patient  | 73.5 | vertebral | 270  | internal | LR                   |  | Accuracy<br>AUC<br>ROC<br>Specificity<br>Sensitivity<br>PPV<br>NPV<br>Diagnostic efficiency |
| Pluskiewicz, W<br>[65] | 2023 | Poland | questionnaire<br>collection | women    | 66.4 | multiple  | 640  | -        | LR                   |  | AUC                                                                                         |
| Kong, X[66]            | 2022 | China  | clinical hospital           | patient  | 55.1 | multiple  | 1730 | -        | SM                   |  | AUC<br>NRI<br>IDI                                                                           |
| Agarwal, A[67]         | 2023 | Canada | electronic health<br>record | women    | 70.7 | multiple  | 9716 | external | SM                   |  | AUC<br>ROC                                                                                  |

\*LR: Logistic Regression; ANN: artificial neural network; SVM = support-vector machine; CNN: convolutional neural network; kNN: k-nearest neighbors; RF: random forests; DT: decision tree; NB: Naive Bayes; BT: Boosted tree; SM: Survival model; DL: deep learning model; AUC: area under the receiver operating



1  
2  
3  
4  
5  
6  
7  
8  
9  
10  
11  
12  
13  
14  
15  
16  
17  
18  
19  
20  
21  
22  
23  
24  
25  
26  
27  
28  
29  
30  
31  
32  
33  
34  
35  
36  
37  
38  
39  
40  
41  
42  
43  
44  
45  
46

characteristic curve;ROC:receiver operating characteristic;PPV:positive predictive value;NPV:negative predictive value;FDR:R false discovery rate;NRI:net reclassification index; IDI:integrated discrimination improvement.

For peer review only

**Table S4** Methodological characteristics of machine learning models developed for outcome prediction in patients with Osteoporosis

| Author      | Year | Data set | Gender | Fracture site      | Events | Sample size | Model type | Verification method      | Missing value processing | C-index | Sensitivity | Specificity | Accuracy |
|-------------|------|----------|--------|--------------------|--------|-------------|------------|--------------------------|--------------------------|---------|-------------|-------------|----------|
| Wu, Q       | 2020 | Train    | M      | Multiple fractures | 361    | 4104        | LR         | 10-fold cross validation | Median interpolation     |         |             |             |          |
| Wu, Q       | 2020 | Train    | M      | Multiple fractures | 361    | 4104        | RF         | 10-fold cross validation | Median interpolation     |         |             |             |          |
| Wu, Q       | 2020 | Train    | M      | Multiple fractures | 361    | 4104        | BT         | 10-fold cross validation | Median interpolation     |         |             |             |          |
| Wu, Q       | 2020 | Train    | M      | Multiple fractures | 361    | 4104        | ANN        | 10-fold cross validation | Median interpolation     |         |             |             |          |
| Wu, Q       | 2020 | Test     | M      | Multiple fractures | 90     | 1026        | LR         | 10-fold cross validation | Median interpolation     | 0.6410  | 0.7610      | 0.4420      | 0.6980   |
| Wu, Q       | 2020 | Test     | M      | Multiple fractures | 90     | 1026        | RF         | 10-fold cross validation | Median interpolation     | 0.7005  | 0.7000      | 0.4670      | 0.7590   |
| Wu, Q       | 2020 | Test     | M      | Multiple fractures | 90     | 1026        | BT         | 10-fold cross validation | Median interpolation     | 0.7100  | 0.5650      | 0.6930      | 0.8840   |
| Wu, Q       | 2020 | Test     | M      | Multiple fractures | 90     | 1026        | ANN        | 10-fold cross validation | Median interpolation     | 0.6910  | 0.7120      | 0.5980      | 0.8390   |
| Villamor, E | 2020 | Train    | F      | Hip fracture       | 65     | 101         | LR         | 10-fold cross validation |                          |         |             |             | 0.7669   |
| Villamor, E | 2020 | Train    | F      | Hip fracture       | 65     | 101         | SVM        | 10-fold cross validation |                          |         |             |             | 0.7569   |

| Author          | Year | Data set | Gender | Fracture site      | Events | Sample size | Model type | Verification method      | Missing value processing | C-index | Sensitivity | Specificity | Accuracy |
|-----------------|------|----------|--------|--------------------|--------|-------------|------------|--------------------------|--------------------------|---------|-------------|-------------|----------|
| Villamor, E     | 2020 | Train    | F      | Hip fracture       | 65     | 101         | ANN        | 10-fold cross validation |                          |         |             |             | 0.7642   |
| Villamor, E     | 2020 | Train    | F      | Hip fracture       | 65     | 101         | RF         | 10-fold cross validation |                          |         |             |             | 0.6940   |
| Villamor, E     | 2020 | Test     | F      | Hip fracture       | 65     | 101         | LR         | 10-fold cross validation |                          |         |             |             | 0.7309   |
| Villamor, E     | 2020 | Test     | F      | Hip fracture       | 65     | 101         | SVM        | 10-fold cross validation |                          |         |             |             | 0.7835   |
| Villamor, E     | 2020 | Test     | F      | Hip fracture       | 65     | 101         | ANN        | 10-fold cross validation |                          |         |             |             | 0.6940   |
| Villamor, E     | 2020 | Test     | F      | Hip fracture       | 65     | 101         | RF         | 10-fold cross validation |                          |         |             |             | 0.7334   |
| van Geel, Tacm  | 2011 | Train    | F      | Vertebral fracture | 382    | 2372        | SM         | Bootstrapping            |                          |         |             |             |          |
| Ulivieri, F. M  | 2021 | Train    | F      | Vertebral fracture | 56     | 90          | ANN        |                          |                          | 0.8300  | 0.7500      | 0.8372      |          |
| Yoda, T         | 2021 | Train    | M+F    | Vertebral fracture | 28     | 50          | CNN        | 5-fold cross validation  |                          | 0.9670  | 0.9250      | 0.9490      | 0.9380   |
| Yoda, T         | 2021 | Test     | M+F    | Vertebral fracture | 21     | 47          | CNN        | 5-fold cross validation  |                          | 0.9840  | 0.9810      | 0.9490      | 0.9640   |
| Jiang, X. Z     | 2013 | Train    | F      | Multiple fractures | 15     | 615         | LR         |                          |                          | 0.7600  | 0.8100      | 0.4700      | 0.5100   |
| Schousboe, J. T | 2014 | Train    | F      | Vertebral fracture | 2883   | 7233        | LR         |                          |                          | 0.6790  |             |             |          |

| Author            | Year | Data set | Gender | Fracture site      | Events    | Sample size | Model type | Verification method      | Missing value processing | C-index | Sensitivity | Specificity | Accuracy |
|-------------------|------|----------|--------|--------------------|-----------|-------------|------------|--------------------------|--------------------------|---------|-------------|-------------|----------|
| Sandhu, S. K      | 2010 | Train    | F      | Multiple fractures | 47        | 144         | LR         |                          |                          | 0.8400  | 0.7800      | 0.8000      |          |
| Sandhu, S. K      | 2010 | Train    | M      | Multiple fractures | 18        | 56          | LR         |                          |                          | 0.7600  | 0.7400      | 0.8000      |          |
| Rubin, K. H       | 2018 | Train    | F      | Multiple fractures | 1189<br>8 | 647103      | LR         |                          |                          | 0.7500  | 0.7520      | 0.5650      |          |
| Rubin, K. H       | 2018 | Train    | M      | Multiple fractures | 1185<br>1 | 647103      | LR         |                          |                          | 0.7520  | 0.6450      | 0.6090      |          |
| Rubin, K. H       | 2018 | Test     | F      | Multiple fractures | 4762      | 600567      | LR         |                          |                          | 0.8740  | 0.6000      | 0.6990      |          |
| Rubin, K. H       | 2018 | Test     | M      | Multiple fractures | 4776      | 600566      | LR         |                          |                          | 0.8510  | 0.6300      | 0.5840      |          |
| Pluskiewicz, W    | 2010 | Train    | F      | Hip fracture       | 1599      | 2012        | LR         |                          |                          | 0.850   | 0.7590      | 0.7370      |          |
| Pluskiewicz, W    | 2010 | Train    | F      | Multiple fractures | 1704      | 2012        | LR         |                          |                          | 0.8790  | 0.7390      | 0.5980      |          |
| Jang, E. J        | 2016 | Train    | M      | Multiple fractures | 36        | 363         | LR         |                          |                          | 0.7390  |             |             |          |
| Jang, E. J        | 2016 | Train    | F      | Multiple fractures | 50        | 405         | LR         |                          |                          | 0.7180  |             |             |          |
| Barret A. Monchka | 2021 | Train    | M+F    | Vertebral fracture | 1470      | 8920        | CNN        |                          |                          | 0.9500  | 0.8240      | 0.9430      | 0.9230   |
| Mehta, S. D       | 2020 | Train    | M+F    | Vertebral fracture | 86        | 246         | SVM        | 10-fold cross validation |                          | 0.9258  | 0.8950      | 0.9560      | 0.9350   |
| Mehta, S. D       | 2020 | Test     | M+F    | Vertebral fracture | 22        | 61          | SVM        | 10-fold cross validation |                          | 0.8963  | 0.8180      | 0.9740      | 0.9180   |
| Langsetmo, L      | 2011 | Test     | M      | Multiple fractures | 139       | 1606        | SM         |                          |                          | 0.7000  |             |             |          |

| Author          | Year | Data set | Gender | Fracture site      | Events | Sample size | Model type | Verification method      | Missing value processing | C-index | Sensitivity | Specificity | Accuracy |
|-----------------|------|----------|--------|--------------------|--------|-------------|------------|--------------------------|--------------------------|---------|-------------|-------------|----------|
| Langsetmo, L    | 2011 | Test     | F      | Multiple fractures | 672    | 4152        | SM         |                          |                          | 0.6900  |             |             |          |
| Ioannidis, G    | 2017 | Train    | M+F    | Multiple fractures | 3858   | 22386       | DT         |                          |                          | 0.6690  |             |             |          |
| Ioannidis, G    | 2017 | Test     | M+F    | Multiple fractures | 1294   | 7462        | DT         |                          |                          | 0.6870  |             |             |          |
| K. K. Nishiyama | 2013 | Train    | F      | Multiple fractures | 44     | 88          | SVM        | 10-fold cross validation |                          | 0.6800  | 0.5280      | 0.7970      | 0.6890   |
| K. K. Nishiyama | 2013 | Test     | F      | Multiple fractures | 14     | 28          | SVM        | 10-fold cross validation |                          | 0.8000  | 0.6880      | 0.8850      | 0.8100   |
| Kruse, C        | 2017 | Train    | F      | Hip fracture       | 293    | 4722        | NB         | 5-fold cross validation  | random forest imputation | 0.9200  | 0.8800      | 0.8100      |          |
| Kruse, C        | 2017 | Train    | M      | Hip fracture       | 47     | 717         | DT         | 5-fold cross validation  | random forest imputation | 0.8900  | 1.0000      | 0.6900      |          |
| Kolanu, N       | 2021 | Train    | M+F    | Multiple fractures | 433    | 5089        | ANN        |                          |                          |         | 0.9900      | 0.9950      |          |
| Kolanu, N       | 2021 | Test     | M+F    | Multiple fractures | 97     | 327         | ANN        |                          |                          |         | 0.6960      | 0.9500      |          |
| Kim, H. Y       | 2016 | Train    | M      | Multiple fractures | 4889   | 185127      | SM         |                          |                          | 0.6800  |             |             |          |
| Kim, H. Y       | 2016 | Train    | F      | Multiple fractures | 1495   | 174126      | SM         |                          |                          | 0.6500  |             |             |          |
| Kim, H. Y       | 2016 | Test     | M+F    | Multiple fractures | 1991   | 359255      | SM         |                          |                          | 0.6650  |             |             |          |
| Hsieh, C. I     | 2021 | Train    | M+F    | Hip fracture       | 2254   | 5164        | Other DL   | 4-fold cross validation  |                          | 0.9700  | 0.8820      | 0.9140      | 0.9000   |

| Author      | Year | Data set | Gender | Fracture site      | Events | Sample size | Model type | Verification method     | Missing value processing | C-index | Sensitivity | Specificity | Accuracy |
|-------------|------|----------|--------|--------------------|--------|-------------|------------|-------------------------|--------------------------|---------|-------------|-------------|----------|
| Hsieh, C. I | 2021 | Test     | M+F    | Hip fracture       | 922    | 2060        | Other DL   | 4-fold cross validation |                          | 0.9600  | 0.8990      | 0.9200      | 0.9100   |
| Hsieh, C. I | 2021 | Train    | M+F    | Vertebral fracture | 530    | 57662       | Other DL   | 4-fold cross validation |                          | 0.9700  | 0.6960      | 0.9790      | 0.9500   |
| Hsieh, C. I | 2021 | Test     | M+F    | Vertebral fracture | 922    | 3346        | Other DL   | 4-fold cross validation |                          | 0.9400  | 0.7400      | 0.9730      | 0.9480   |
| Hong, N     | 2021 | Train    | F      | Hip fracture       | 143    | 433         | RF         |                         |                          | 0.7840  |             |             | 0.7300   |
| Hong, N     | 2021 | Train    | F      | Hip fracture       | 143    | 433         | BT         |                         |                          | 0.7680  |             |             | 0.7200   |
| Hong, N     | 2021 | Train    | F      | Hip fracture       | 143    | 433         | SVM        |                         |                          | 0.7590  |             |             | 0.7400   |
| Hong, N     | 2021 | Train    | F      | Hip fracture       | 143    | 433         | BT         |                         |                          | 0.7580  |             |             | 0.7300   |
| Hong, N     | 2021 | Test     | F      | Hip fracture       | 34     | 2029        | SM         |                         |                          | 0.8400  |             |             |          |
| Ho-Le, T. P | 2017 | Train    | F      | Hip fracture       | 54     | 700         | ANN        | 5-fold cross validation |                          |         | 0.8890      | 0.8610      | 0.8630   |
| Ho-Le, T. P | 2017 | Train    | F      | Hip fracture       | 54     | 700         | LR         | 5-fold cross validation |                          |         | 0.9070      | 0.8640      | 0.8670   |
| Ho-Le, T. P | 2017 | Train    | F      | Hip fracture       | 54     | 700         | KNN        | 5-fold cross validation |                          |         | 1.0000      | 0.8330      | 0.8460   |
| Ho-Le, T. P | 2017 | Train    | F      | Hip fracture       | 54     | 700         | SVM        | 5-fold cross validation |                          |         | 0.9240      | 0.9690      | 0.9660   |
| Ho-Le, T. P | 2017 | Test     | F      | Hip fracture       | 36     | 467         | ANN        | 5-fold cross            |                          |         | 0.8330      | 0.8770      | 0.8730   |

| Author        | Year | Data set | Gender | Fracture site      | Events | Sample size | Model type | Verification method      | Missing value processing | C-index | Sensitivity | Specificity | Accuracy |
|---------------|------|----------|--------|--------------------|--------|-------------|------------|--------------------------|--------------------------|---------|-------------|-------------|----------|
|               |      |          |        |                    |        |             |            | validation               |                          |         |             |             |          |
| Ho-Le, T. P   | 2017 | Test     | F      | Hip fracture       | 36     | 467         | LR         | 5-fold cross validation  |                          | 0.7780  | 0.8180      | 0.8150      |          |
| Ho-Le, T. P   | 2017 | Test     | F      | Hip fracture       | 36     | 467         | KNN        | 5-fold cross validation  |                          | 0.8060  | 0.7930      | 0.7940      |          |
| Ho-Le, T. P   | 2017 | Test     | F      | Hip fracture       | 36     | 467         | SVM        | 5-fold cross validation  |                          | 0.8060  | 0.8160      | 0.8150      |          |
| Henry, M. J   | 2011 | Train    | F      | Multiple fractures | 125    | 600         | LR         |                          |                          | 0.7000  | 0.6420      | 0.6620      |          |
| Galassi, A    | 2020 | Train    | F      | Hip fracture       | 62     | 96          | LR         |                          |                          | 0.7033  | 0.7146      | 0.7081      |          |
| Galassi, A    | 2020 | Train    | F      | Hip fracture       | 62     | 96          | SVM        |                          |                          | 0.9367  | 0.6292      | 0.8077      |          |
| Galassi, A    | 2020 | Train    | F      | Hip fracture       | 62     | 96          | DT         |                          |                          | 0.5967  | 0.7446      | 0.6587      |          |
| Galassi, A    | 2020 | Train    | F      | Hip fracture       | 62     | 96          | RF         |                          |                          | 0.8330  | 0.9231      | 0.8710      |          |
| FitzGerald, G | 2014 | Train    | F      | Multiple fractures | 2638   | 47429       | SM         |                          |                          | 0.6670  |             |             |          |
| Ferizi, U     | 2019 | Train    | F      | Multiple fractures | 32     | 92          | BT         | 23-fold cross validation |                          | 0.6200  | 0.5880      | 0.6670      | 0.6390   |
| Ferizi, U     | 2019 | Train    | F      | Multiple fractures | 32     | 92          | LR         | 23-fold cross validation |                          | 0.6200  | 0.5600      | 0.7010      | 0.6510   |
| Ferizi, U     | 2019 | Train    | F      | Multiple fractures | 32     | 92          | LR         | 23-fold cross validation |                          | 0.6190  | 0.5400      | 0.7010      | 0.6420   |

| Author          | Year | Data set | Gender | Fracture site      | Events | Sample size | Model type        | Verification method      | Missing value processing | C-index | Sensitivity | Specificity | Accuracy |
|-----------------|------|----------|--------|--------------------|--------|-------------|-------------------|--------------------------|--------------------------|---------|-------------|-------------|----------|
| Ferizi, U       | 2019 | Train    | F      | Multiple fractures | 32     | 92          | SVM               | 23-fold cross validation |                          | 0.5910  | 0.4490      | 0.7440      | 0.6410   |
| Ferizi, U       | 2019 | Train    | F      | Multiple fractures | 32     | 92          | kNN               | 23-fold cross validation |                          | 0.5060  | 0.2690      | 0.7420      | 0.5760   |
| Ferizi, U       | 2019 | Train    | F      | Multiple fractures | 32     | 92          | NB                | 23-fold cross validation |                          | 0.5650  | 0.4520      | 0.6790      | 0.6020   |
| Enns-Bray, W. S | 2019 | Train    | F      | Hip fracture       | 95     | 254         | LR                |                          |                          | 0.7270  |             |             |          |
| Engels, A       | 2020 | Train    | M+F    | Hip fracture       | 6115   | 20456       | LR                | 10-fold cross validation |                          | 0.7140  |             |             |          |
| Engels, A       | 2020 | Train    | M+F    | Hip fracture       | 6115   | 20456       | RF                | 10-fold cross validation |                          | 0.6860  |             |             |          |
| Engels, A       | 2020 | Train    | M+F    | Hip fracture       | 6115   | 20456       | SVM               | 10-fold cross validation |                          | 0.6600  |             |             |          |
| Engels, A       | 2020 | Train    | M+F    | Hip fracture       | 6115   | 20456       | BT                | 10-fold cross validation |                          | 0.7110  |             |             |          |
| Engels, A       | 2020 | Train    | M+F    | Hip fracture       | 6115   | 20456       | Ensemble learning | 10-fold cross validation |                          | 0.7220  | 1.0000      |             |          |
| Engels, A       | 2020 | Train    | M+F    | Hip fracture       | 6115   | 20456       | BT                | 10-fold cross validation |                          | 0.7250  |             |             |          |
| Engels, A       | 2020 | Test     | M+F    | Hip fracture       | 1529   | 57618       | LR                | 10-fold cross validation |                          | 0.6950  | 1.0000      |             |          |



| Author            | Year | Data set | Gender | Fracture site      | Events | Sample size | Model type        | Verification method      | Missing value processing | C-index | Sensitivity | Specificity | Accuracy |
|-------------------|------|----------|--------|--------------------|--------|-------------|-------------------|--------------------------|--------------------------|---------|-------------|-------------|----------|
| Engels, A         | 2020 | Test     | M+F    | Hip fracture       | 1529   | 57618       | RF                | 10-fold cross validation |                          | 0.6850  |             |             |          |
| Engels, A         | 2020 | Test     | M+F    | Hip fracture       | 1529   | 57618       | SVM               | 10-fold cross validation |                          | 0.6500  |             |             |          |
| Engels, A         | 2020 | Test     | M+F    | Hip fracture       | 1529   | 57618       | BT                | 10-fold cross validation |                          | 0.7020  |             |             |          |
| Engels, A         | 2020 | Test     | M+F    | Hip fracture       | 1529   | 57618       | Ensemble learning | 10-fold cross validation |                          | 0.6980  |             |             |          |
| Engels, A         | 2020 | Test     | M+F    | Hip fracture       | 1529   | 57618       | BT                | 10-fold cross validation |                          | 0.7030  |             |             |          |
| de Vries, B. C. S | 2021 | Train    | M+F    | Multiple fractures | 805    | 7578        | SM                |                          |                          | 0.6970  |             |             |          |
| de Vries, B. C. S | 2021 | Train    | M+F    | Multiple fractures | 805    | 7578        | ANN               |                          |                          | 0.6700  |             |             |          |
| de Vries, B. C. S | 2021 | Train    | M+F    | Multiple fractures | 805    | 7578        | RF                |                          |                          | 0.6870  |             |             |          |
| de Vries, B. C. S | 2021 | Test     | M+F    | Multiple fractures | 165    | 1770        | SM                |                          |                          | 0.6250  |             |             |          |
| de Vries, B. C. S | 2021 | Test     | M+F    | Multiple fractures | 165    | 1770        | ANN               |                          |                          | 0.5880  |             |             |          |
| de Vries, B. C. S | 2021 | Test     | M+F    | Multiple fractures | 165    | 1770        | RF                |                          |                          | 0.5930  |             |             |          |
| Cheung, E. Y      | 2012 | Train    | F      | Multiple fractures | 106    | 2266        | SM                |                          |                          | 0.7300  | 0.8080      | 0.5170      |          |
| Chanplakorn, P    | 2021 | Train    | F      | Vertebral fracture | 179    | 617         | LR                |                          |                          | 0.6500  | 0.4300      | 0.8600      |          |

| Author           | Year | Data set | Gender | Fracture site      | Events  | Sample size | Model type | Verification method      | Missing value processing | C-index | Sensitivity | Specificity | Accuracy |
|------------------|------|----------|--------|--------------------|---------|-------------|------------|--------------------------|--------------------------|---------|-------------|-------------|----------|
| Bredbenner, T. L | 2014 | Train    | M      | Hip fracture       | 45      | 472         | LR         | 10-fold cross validation |                          | 0.9300  |             |             |          |
| Beyaz, S         | 2020 | Train    | M+F    | Multiple fractures | 235     | 2106        | CNN        | 5-fold cross validation  |                          |         | 0.8250      | 0.6930      | 0.7770   |
| Berry, S. D      | 2018 | Train    | M      | Hip fracture       | 3541    | 119874      | SM         |                          |                          | 0.6922  |             |             |          |
| Berry, S. D      | 2018 | Train    | F      | Hip fracture       | 11012   | 299794      | SM         |                          |                          | 0.7106  |             |             |          |
| Berry, S. D      | 2018 | Test     | M+F    | Hip fracture       | 28050   | 858636      | SM         |                          |                          | 0.6800  |             |             |          |
| Beaudoin, C      | 2021 | Train    | M+F    | Multiple fractures | 57678   | 307909      | SM         |                          |                          | 0.6810  |             |             |          |
| Beaudoin, C      | 2021 | Test     | M+F    | Multiple fractures | 21809   | 273372      | SM         |                          |                          | 0.6790  |             |             |          |
| Baleanu, F       | 2022 | Train    | F      | Multiple fractures | 410     | 3560        | LR         |                          |                          | 0.7300  |             |             |          |
| Almog, Y. A      | 2020 | Train    | M+F    | Vertebral fracture | 2468694 | 6329986     | ANN        |                          |                          | 0.8120  | 0.8120      |             | 0.1920   |
| Almog, Y. A      | 2020 | Test     | M+F    | Vertebral fracture | 295479  | 3476219     | ANN        |                          |                          | 0.6680  | 0.7070      |             | 0.1140   |
| Zagorski, P      | 2021 | Train    | F      | Hip fracture       | 49      | 389         | LR         |                          |                          | 0.8840  | 0.9390      | 0.7120      |          |
| Diez-Perez, A    | 2007 | Train    | F      | Multiple fractures | 363     | 5201        | SM         |                          |                          | 0.6720  |             |             |          |
| Lix, L. M        | 2018 | Train    | F      | Multiple fractures | 749     | 31999       | LR         |                          |                          | 0.7060  |             |             |          |
| Li, Q. J         | 2021 | Train    | F      | Multiple fractures | 49      | 403         | LR         |                          |                          | 0.8820  |             |             |          |
| Li, Q. J         | 2021 | Test     | F      | Multiple fractures | 17      | 159         | LR         |                          |                          | 0.8690  |             |             |          |

| Author             | Year | Data set | Gender | Fracture site      | Events | Sample size | Model type   | Verification method | Missing value processing | C-index | Sensitivity | Specificity | Accuracy |
|--------------------|------|----------|--------|--------------------|--------|-------------|--------------|---------------------|--------------------------|---------|-------------|-------------|----------|
| Lee, S             | 2008 | Train    | F      | Multiple fractures | 47     | 94          | SVM          |                     |                          |         | 0.8500      | 0.4900      |          |
| Jacobs, J. W. G    | 2010 | Train    | M      | Vertebral fracture | 58     | 109         | LR           |                     |                          | 0.5100  |             |             |          |
| Jacobs, J. W. G    | 2010 | Train    | F      | Vertebral fracture | 98     | 205         | LR           |                     |                          | 0.7400  | 0.6700      | 0.7100      |          |
| Eller-Vainicher, C | 2011 | Train    | F      | Vertebral fracture | 33     | 372         | LR           |                     |                          | 0.8230  | 0.3730      | 0.9030      | 0.6380   |
| Eller-Vainicher, C | 2011 | Train    | F      | Vertebral fracture | 33     | 372         | ANN          |                     |                          | 0.6990  | 0.7480      | 0.8780      | 0.8130   |
| Zhong, B. Y        | 2017 | Train    | M+F    | Vertebral fracture | 33     | 256         | SM           |                     |                          | 0.7800  |             |             |          |
| Zhong, B. Y        | 2017 | Test     | M+F    | Vertebral fracture | 23     | 165         | SM           |                     |                          | 0.7200  |             |             |          |
| Xiao, X            | 2021 | Train    | F      | Hip fracture       | 25     | 699         | SM           |                     |                          | 0.8040  |             |             |          |
| Du, J              | 2022 | Train    | M+F    | Femur fracture     |        | 96          | SVM          |                     |                          |         |             | 0.6250      |          |
| Du, J              | 2022 | Train    | M+F    | Femur fracture     |        | 96          | RF           |                     |                          |         |             | 0.5000      |          |
| Du, J              | 2022 | Train    | M+F    | Femur fracture     |        | 96          | DT           |                     |                          |         |             | 0.5833      |          |
| Du, J              | 2022 | Train    | M+F    | Femur fracture     |        | 96          | Boosted tree |                     |                          |         |             | 0.5000      |          |
| Du, J              | 2022 | Train    | M+F    | Femur fracture     |        | 96          | ANN          |                     |                          |         |             | 0.5833      |          |
| Du, J              | 2022 | Train    | M+F    | Femur fracture     |        | 96          | Boosted tree |                     |                          |         |             | 0.5417      |          |
| Du, J              | 2022 | Test     | M+F    | Femur fracture     |        | 24          | SVM          |                     |                          |         |             |             | 0.9167   |

| Author        | Year | Data set | Gender | Fracture site      | Events | Sample size | Model type   | Verification method      | Missing value processing | C-index | Sensitivity | Specificity | Accuracy |
|---------------|------|----------|--------|--------------------|--------|-------------|--------------|--------------------------|--------------------------|---------|-------------|-------------|----------|
| Du,J          | 2022 | Test     | M+F    | Femur fracture     |        | 24          | RF           |                          |                          |         |             |             | 0.8333   |
| Du,J          | 2022 | Test     | M+F    | Femur fracture     |        | 24          | DT           |                          |                          |         |             |             | 0.9167   |
| Du,J          | 2022 | Test     | M+F    | Femur fracture     |        | 24          | Boosted tree |                          |                          |         |             |             | 0.8750   |
| Du,J          | 2022 | Test     | M+F    | Femur fracture     |        | 24          | ANN          |                          |                          |         |             |             | 0.9583   |
| Du,J          | 2022 | Test     | M+F    | Femur fracture     |        | 24          | Boosted tree |                          |                          |         |             |             | 0.9167   |
| Wang,M        | 2022 | Train    | M+F    | Vertebral fracture | 72     | 7906        | SM           | 10-fold cross validation |                          | 0.820   |             |             |          |
| Dong,Q        | 2022 | Train    | M+F    | Vertebral fracture |        | 3413        | Other DL     |                          |                          | 0.990   | 0.5980      | 0.9990      | 0.9950   |
| Dong,Q        | 2022 | Test     | M+F    | Vertebral fracture |        | 379         | Other DL     |                          |                          | 0.820   | 0.9770      | 0.9510      | 0.9510   |
| Wen,Z         | 2022 | Train    | M+F    | Vertebral fracture | 208    | 220         | LR           |                          |                          | 0.854   | 0.7310      | 0.8460      |          |
| Wen,Z         | 2022 | Test     | M+F    | Vertebral fracture | 50     | 50          | LR           |                          |                          | 0.979   | 0.8942      | 0.9545      |          |
| Pluskiewicz,W | 2023 | Train    | F      | Multiple fractures | 129    | 640         | LR           |                          |                          | 0.660   |             |             |          |
| Kong,X        | 2022 | Train    | M+F    | Multiple fractures | 109    | 1730        | SM           | Bootstrapping            | Mean interpolation       | 0.803   |             |             |          |
| Agarwal,A     | 2023 | Test     | F      | Multiple fractures | 264    | 9716        | SM           |                          |                          | 0.710   |             |             |          |

\*M:Male;F:Female;LR:Logistic Regression;ANN:artificial neural network;SVM:support-vector machine; CNN:convolutional ANN; kNN:k-nearest neighbors; RF:random forests;DT:decision tree;BT:Boosted tree;SM:Survival model;NB:Naive Bayes;DL:deep learning model.

**Table S5** Risk of bias assessment grading of the machine learning predictive modelling studies of osteoporosis populations as per the PROBAST criteria

| Study             | Participants bias | Predictors bias | Outcome bias | Analysis bias | Overall bias rating |
|-------------------|-------------------|-----------------|--------------|---------------|---------------------|
| Wu, Q             | low               | low             | low          | high          | high                |
| Wu, Q             | low               | low             | low          | high          | high                |
| Wu, Q             | low               | low             | low          | high          | high                |
| Wu, Q             | low               | low             | low          | high          | high                |
| Villamor, E       | high              | unclear         | unclear      | high          | high                |
| Villamor, E       | high              | unclear         | unclear      | high          | high                |
| Villamor, E       | high              | unclear         | unclear      | high          | high                |
| Villamor, E       | high              | low             | unclear      | high          | high                |
| Van Geel, Tacm    | low               | low             | low          | high          | high                |
| Ulivieri, F. M    | low               | low             | low          | high          | high                |
| Yoda, T           | low               | low             | low          | high          | high                |
| Jiang, X. Z       | low               | low             | low          | high          | high                |
| Schousboe, J. T   | high              | low             | low          | unclear       | high                |
| Sandhu, S. K      | high              | unclear         | unclear      | high          | high                |
| Rubin, K. H       | low               | low             | low          | unclear       | unclear             |
| Pluskiewicz, W    | high              | low             | low          | unclear       | high                |
| Jang, E. J        | low               | low             | low          | high          | high                |
| Barret A. Monchka | high              | low             | low          | unclear       | high                |
| Mehta, S. D       | high              | unclear         | unclear      | high          | high                |
| Langsetmo, L      | low               | low             | low          | unclear       | unclear             |
| Ioannidis, G      | high              | low             | low          | unclear       | high                |
| K. K. Nishiyama   | low               | low             | low          | high          | high                |

|    |               |      |         |         |         |         |
|----|---------------|------|---------|---------|---------|---------|
| 1  |               |      |         |         |         |         |
| 2  |               |      |         |         |         |         |
| 3  |               |      |         |         |         |         |
| 4  | Kruse, C      | low  | low     | low     | unclear | unclear |
| 5  | Kruse, C      | low  | low     | low     | unclear | unclear |
| 6  | Kolanu, N     | high | low     | low     | unclear | high    |
| 7  | Kim, H. Y     | low  | low     | low     | unclear | unclear |
| 8  | Kim, H. Y     | low  | low     | low     | unclear | unclear |
| 9  | Hsieh, C. I   | low  | low     | low     | unclear | unclear |
| 10 | Hsieh, C. I   | low  | low     | low     | unclear | unclear |
| 11 | Hong, N       | low  | low     | low     | unclear | unclear |
| 12 | Hong, N       | low  | low     | low     | unclear | unclear |
| 13 | Hong, N       | low  | low     | low     | unclear | unclear |
| 14 | Hong, N       | low  | low     | low     | unclear | unclear |
| 15 | Hong, N       | low  | low     | low     | unclear | unclear |
| 16 | Hong, N       | low  | low     | low     | unclear | unclear |
| 17 | Hong, N       | low  | low     | low     | unclear | unclear |
| 18 | Ho-Le, T. P   | low  | low     | low     | high    | high    |
| 19 | Ho-Le, T. P   | low  | low     | low     | high    | high    |
| 20 | Ho-Le, T. P   | low  | low     | low     | high    | high    |
| 21 | Ho-Le, T. P   | low  | low     | low     | high    | high    |
| 22 | Ho-Le, T. P   | low  | low     | low     | high    | high    |
| 23 | Ho-Le, T. P   | low  | low     | low     | high    | high    |
| 24 | Henry, M. J   | low  | low     | low     | unclear | unclear |
| 25 | Henry, M. J   | low  | low     | low     | unclear | unclear |
| 26 | Galassi, A    | low  | low     | low     | high    | high    |
| 27 | Galassi, A    | low  | low     | low     | high    | high    |
| 28 | Galassi, A    | low  | low     | low     | high    | high    |
| 29 | Galassi, A    | low  | low     | low     | high    | high    |
| 30 | Galassi, A    | low  | low     | low     | high    | high    |
| 31 | Galassi, A    | low  | low     | low     | high    | high    |
| 32 | FitzGerald, G | low  | low     | low     | unclear | unclear |
| 33 | Ferizi, U     | high | unclear | unclear | high    | high    |
| 34 | Ferizi, U     | high | unclear | unclear | high    | high    |
| 35 | Ferizi, U     | high | unclear | unclear | high    | high    |
| 36 | Ferizi, U     | high | unclear | unclear | high    | high    |
| 37 | Ferizi, U     | high | unclear | unclear | high    | high    |
| 38 | Ferizi, U     | high | unclear | unclear | high    | high    |
| 39 | Ferizi, U     | high | unclear | unclear | high    | high    |
| 40 | Ferizi, U     | high | unclear | unclear | high    | high    |
| 41 | Ferizi, U     | high | unclear | unclear | high    | high    |
| 42 |               |      |         |         |         |         |
| 43 |               |      |         |         |         |         |
| 44 |               |      |         |         |         |         |
| 45 |               |      |         |         |         |         |
| 46 |               |      |         |         |         |         |
| 47 |               |      |         |         |         |         |

---

|    |                    |      |         |         |         |         |
|----|--------------------|------|---------|---------|---------|---------|
| 1  |                    |      |         |         |         |         |
| 2  |                    |      |         |         |         |         |
| 3  |                    |      |         |         |         |         |
| 4  | Enns-Bray, W. S    | high | low     | low     | high    | high    |
| 5  | Engels, A          | low  | low     | low     | unclear | unclear |
| 6  | Engels, A          | low  | low     | low     | unclear | unclear |
| 7  | Engels, A          | low  | low     | low     | unclear | unclear |
| 8  | Engels, A          | low  | low     | low     | unclear | unclear |
| 9  | Engels, A          | low  | low     | low     | unclear | unclear |
| 10 | Engels, A          | low  | low     | low     | unclear | unclear |
| 11 | Engels, A          | low  | low     | low     | unclear | unclear |
| 12 | Engels, A          | low  | low     | low     | unclear | unclear |
| 13 | Engels, A          | low  | low     | low     | unclear | unclear |
| 14 | de Vries, B. C. S  | high | low     | low     | unclear | high    |
| 15 | de Vries, B. C. S  | high | low     | low     | unclear | high    |
| 16 | de Vries, B. C. S  | high | low     | low     | unclear | high    |
| 17 | de Vries, B. C. S  | high | low     | low     | unclear | high    |
| 18 | Cheung, E. Y       | low  | low     | low     | unclear | unclear |
| 19 | Chanplakorn, P     | high | low     | low     | unclear | high    |
| 20 | Chanplakorn, P     | high | low     | low     | unclear | high    |
| 21 | Bredbenner, T. L   | high | unclear | unclear | high    | high    |
| 22 | Bredbenner, T. L   | high | unclear | unclear | high    | high    |
| 23 | Beyaz, S           | high | low     | low     | unclear | high    |
| 24 | Berry, S. D        | low  | low     | low     | unclear | unclear |
| 25 | Berry, S. D        | low  | low     | low     | unclear | unclear |
| 26 | Beaudoin, C        | high | low     | low     | unclear | high    |
| 27 | Baleanu, F         | low  | low     | low     | unclear | unclear |
| 28 | Baleanu, F         | low  | low     | low     | unclear | unclear |
| 29 | Baleanu, F         | low  | low     | low     | unclear | unclear |
| 30 | Almog, Y. A        | high | low     | low     | unclear | unclear |
| 31 | Almog, Y. A        | high | low     | low     | unclear | unclear |
| 32 | Zagorski, P        | low  | low     | low     | high    | high    |
| 33 | Diez-Perez, A      | low  | low     | low     | unclear | unclear |
| 34 | Diez-Perez, A      | low  | low     | low     | unclear | unclear |
| 35 | Lix, L. M          | low  | low     | low     | unclear | unclear |
| 36 | Li, Q. J           | high | low     | low     | high    | high    |
| 37 | Li, Q. J           | high | low     | low     | high    | high    |
| 38 | Lee, S             | high | unclear | low     | high    | high    |
| 39 | Jacobs, J. W. G    | low  | low     | low     | unclear | unclear |
| 40 | Jacobs, J. W. G    | low  | low     | low     | unclear | unclear |
| 41 | Eller-Vainicher, C | low  | low     | low     | high    | high    |
| 42 |                    |      |         |         |         |         |
| 43 |                    |      |         |         |         |         |
| 44 |                    |      |         |         |         |         |
| 45 |                    |      |         |         |         |         |
| 46 |                    |      |         |         |         |         |
| 47 |                    |      |         |         |         |         |

---

|    |                    |      |     |     |         |         |
|----|--------------------|------|-----|-----|---------|---------|
| 1  |                    |      |     |     |         |         |
| 2  |                    |      |     |     |         |         |
| 3  |                    |      |     |     |         |         |
| 4  | Eller-Vainicher, C | low  | low | low | high    | high    |
| 5  | Zhong, B. Y        | high | low | low | high    | high    |
| 6  | Xiao, X            | low  | low | low | high    | high    |
| 7  | Du,J               | low  | low | low | high    | high    |
| 8  | Du,J               | low  | low | low | high    | high    |
| 9  | Du,J               | low  | low | low | high    | high    |
| 10 | Du,J               | low  | low | low | high    | high    |
| 11 | Du,J               | low  | low | low | high    | high    |
| 12 | Du,J               | low  | low | low | high    | high    |
| 13 | Du,J               | low  | low | low | high    | high    |
| 14 | Du,J               | low  | low | low | high    | high    |
| 15 | Du,J               | low  | low | low | high    | high    |
| 16 | Du,J               | low  | low | low | high    | high    |
| 17 | Wang,M             | high | low | low | high    | high    |
| 18 | Dong,Q             | low  | low | low | unclear | unclear |
| 19 | Wen,Z              | high | low | low | high    | high    |
| 20 | Pluskiewicz,W      | low  | low | low | high    | high    |
| 21 | Kong,X             | high | low | low | high    | high    |
| 22 | Agarwal,A          | low  | low | low | unclear | unclear |
| 23 |                    |      |     |     |         |         |
| 24 |                    |      |     |     |         |         |
| 25 |                    |      |     |     |         |         |

\*When a single study included multiple models, risk of bias concerns were assessed for each model.



1  
2  
3  
4  
5  
6  
7  
8  
9  
10  
11  
12  
13  
14  
15  
16  
17  
18  
19  
20  
21  
22  
23  
24  
25  
26  
27  
28  
29  
30  
31  
32  
33  
34  
35  
36  
37  
38  
39  
40  
41  
42  
43  
44  
45  
46  
47

**Fig.S1** Forest plots for subgroup analysis of C-index statistics by fracture site and machine learning type in training set

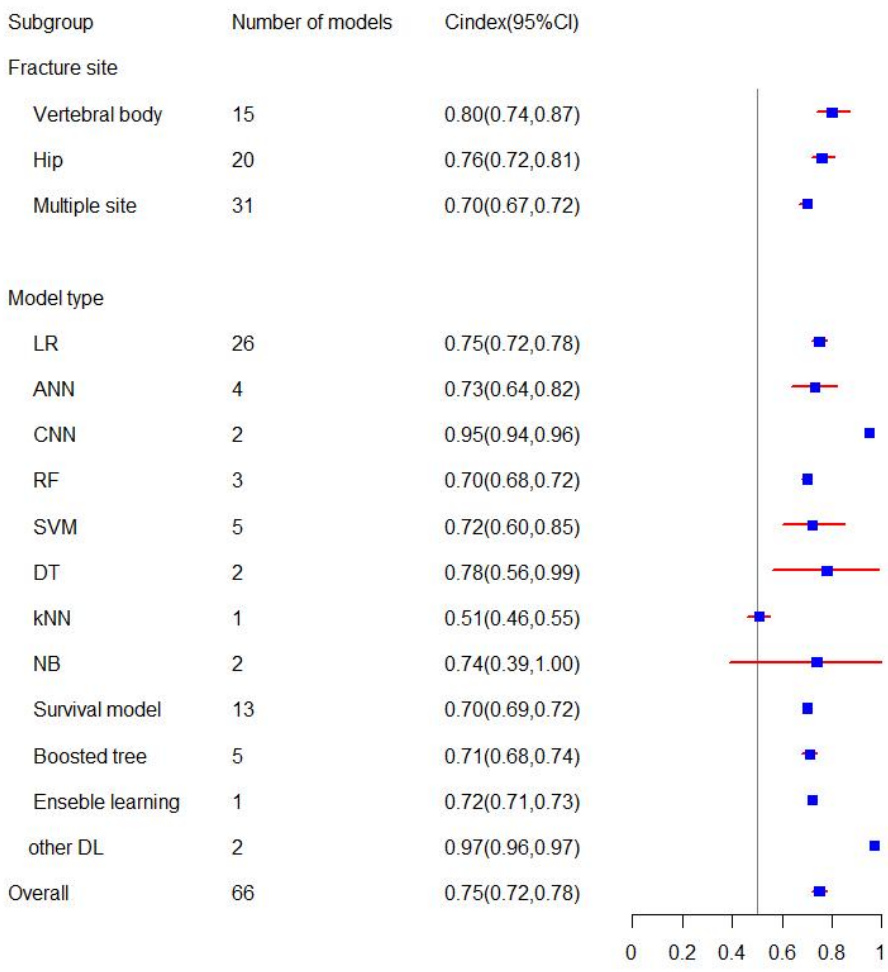

only

**Fig.S2** Forest plots for subgroup analysis of C-index statistics by fracture site and machine learning type in validation set

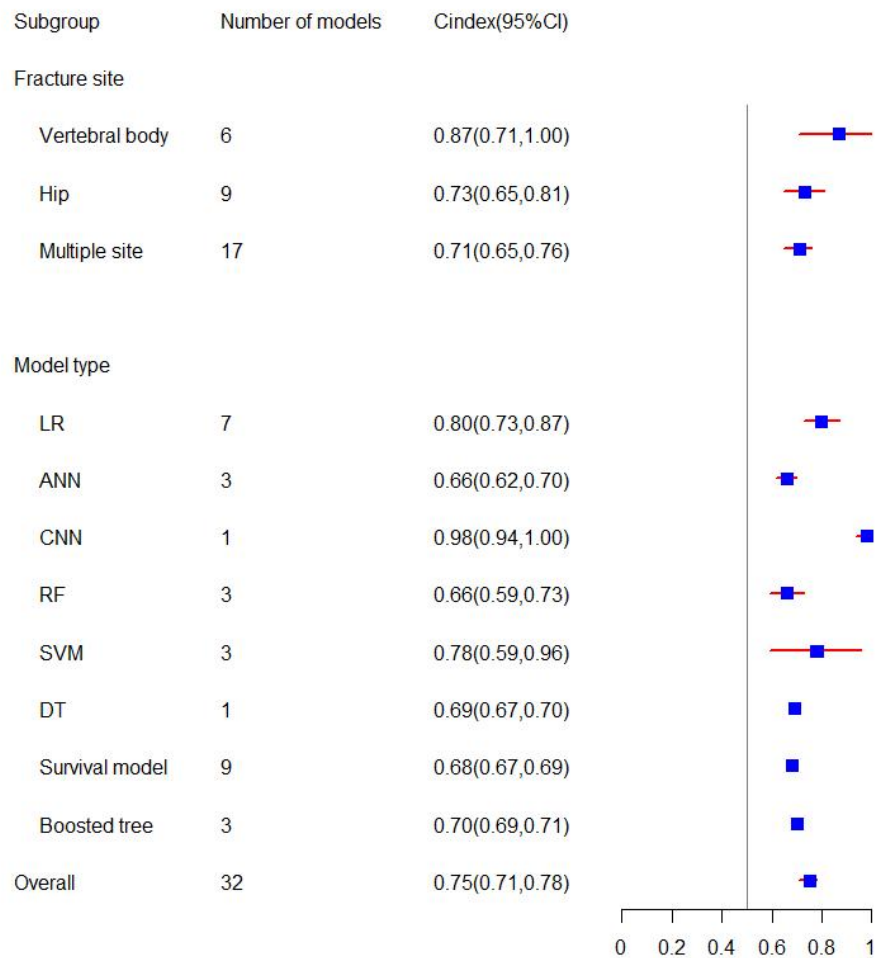

Fig.S3 Sensitivity analysis of multiple fracture model in training set

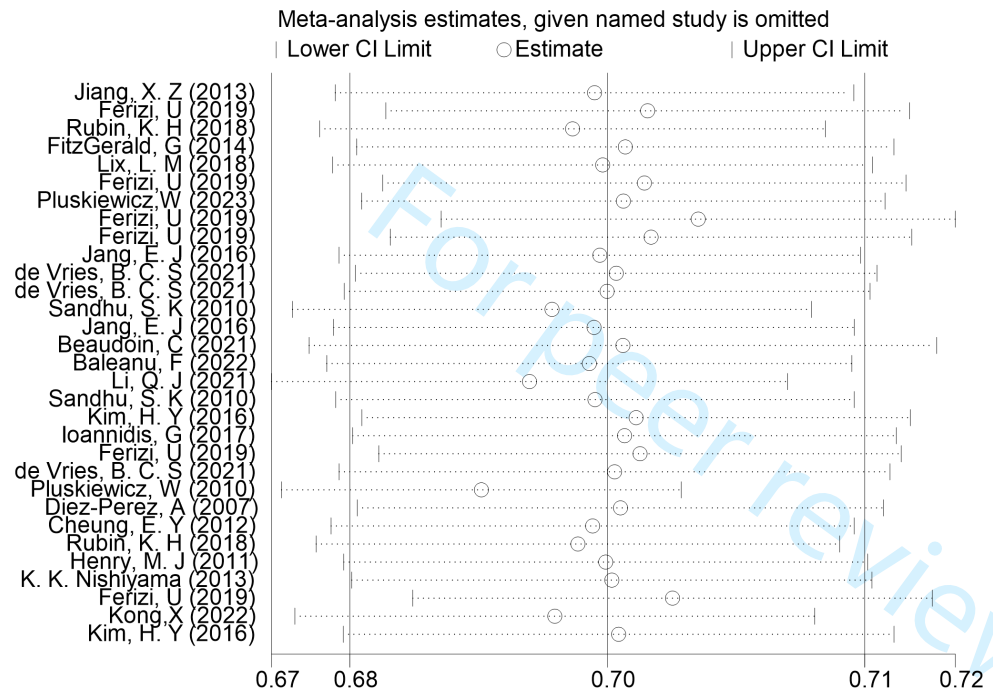

**Fig.S4** Sensitivity analysis of vertebral fracture model in training set

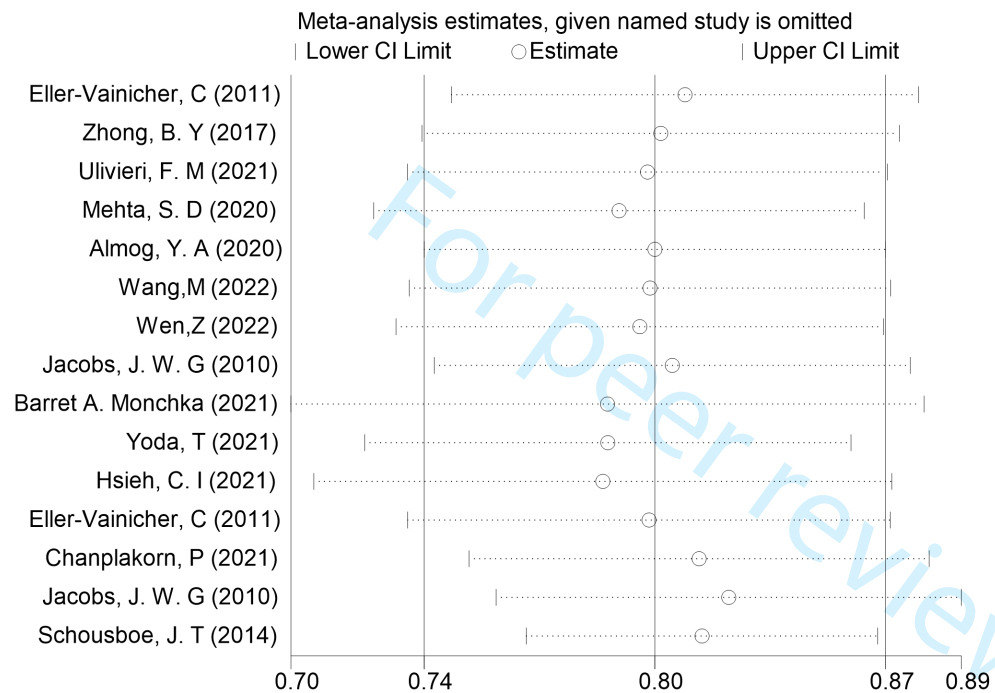

Fig.S5 Sensitivity analysis of hip fracture model in training set

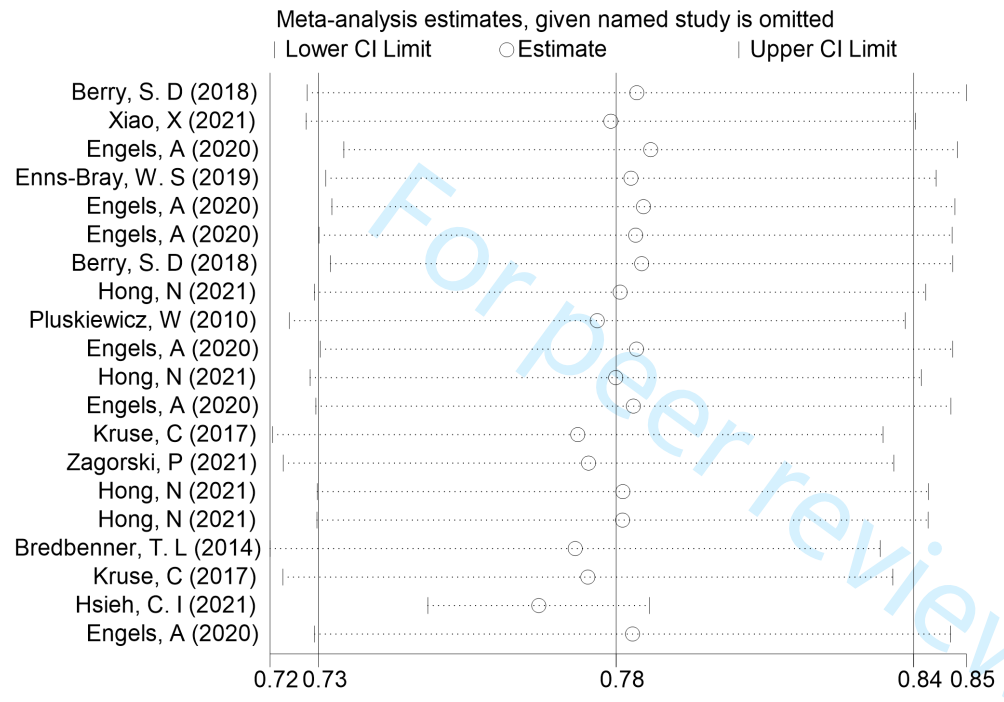

**Fig.S6** Sensitivity analysis of multiple fracture model in validation set

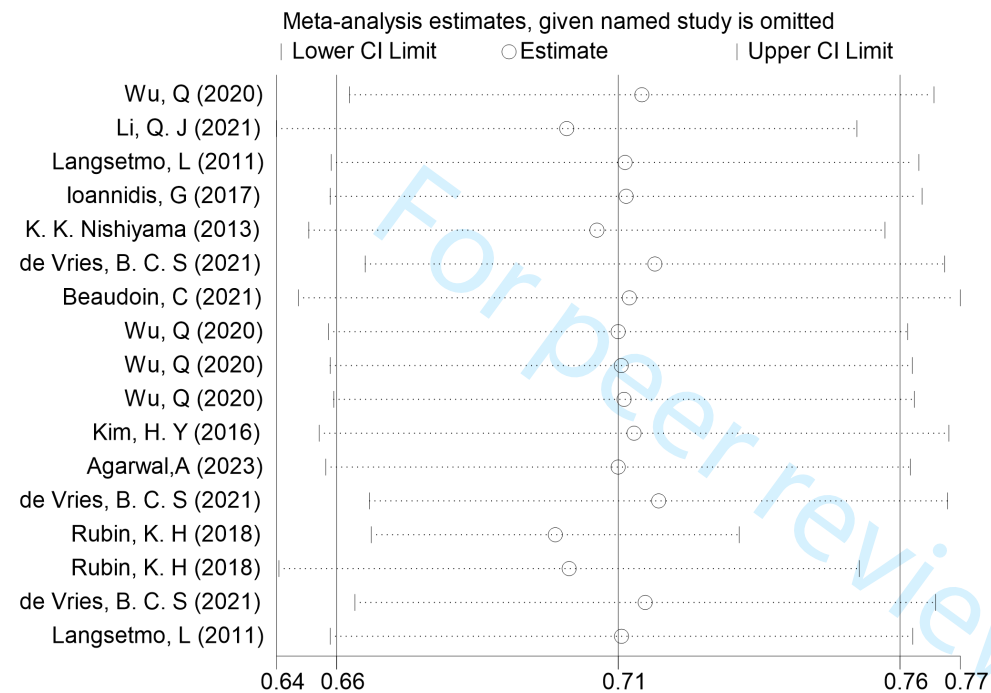

Fig.S7 Sensitivity analysis of vertebral fracture model in validation set

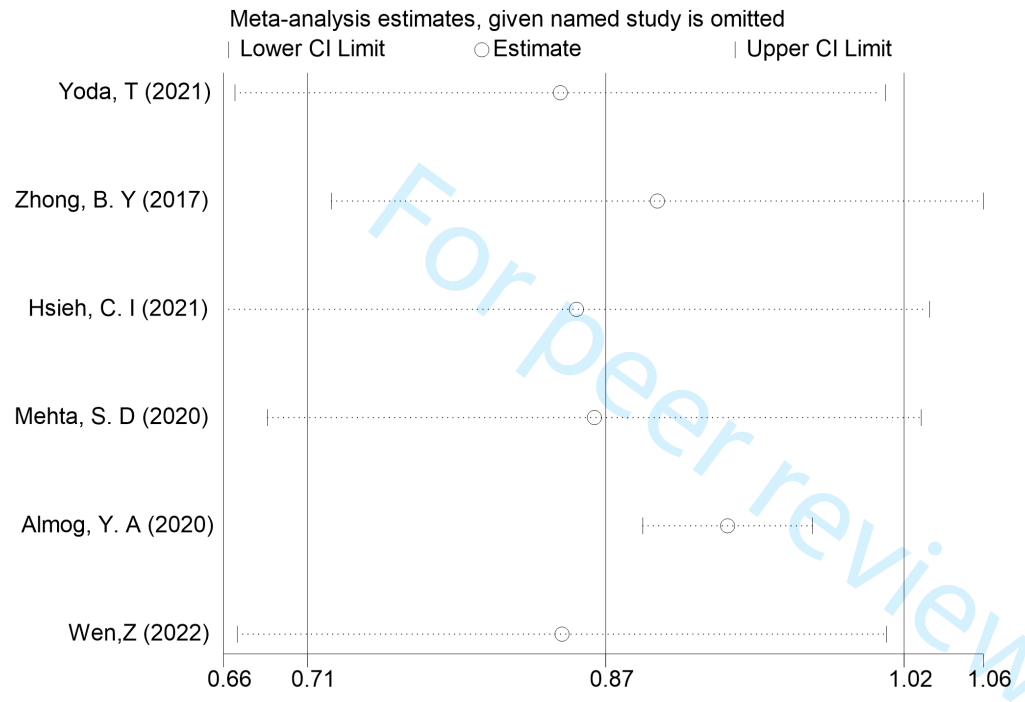

For peer review only

1  
2  
3  
4  
5  
6  
7  
8  
9  
10  
11  
12  
13  
14  
15  
16  
17  
18  
19  
20  
21  
22  
23  
24  
25  
26  
27  
28  
29  
30  
31  
32  
33  
34  
35  
36  
37  
38  
39  
40  
41  
42  
43  
44  
45  
46  
47

**Fig.S8** Sensitivity analysis of hip fracture model in validation set

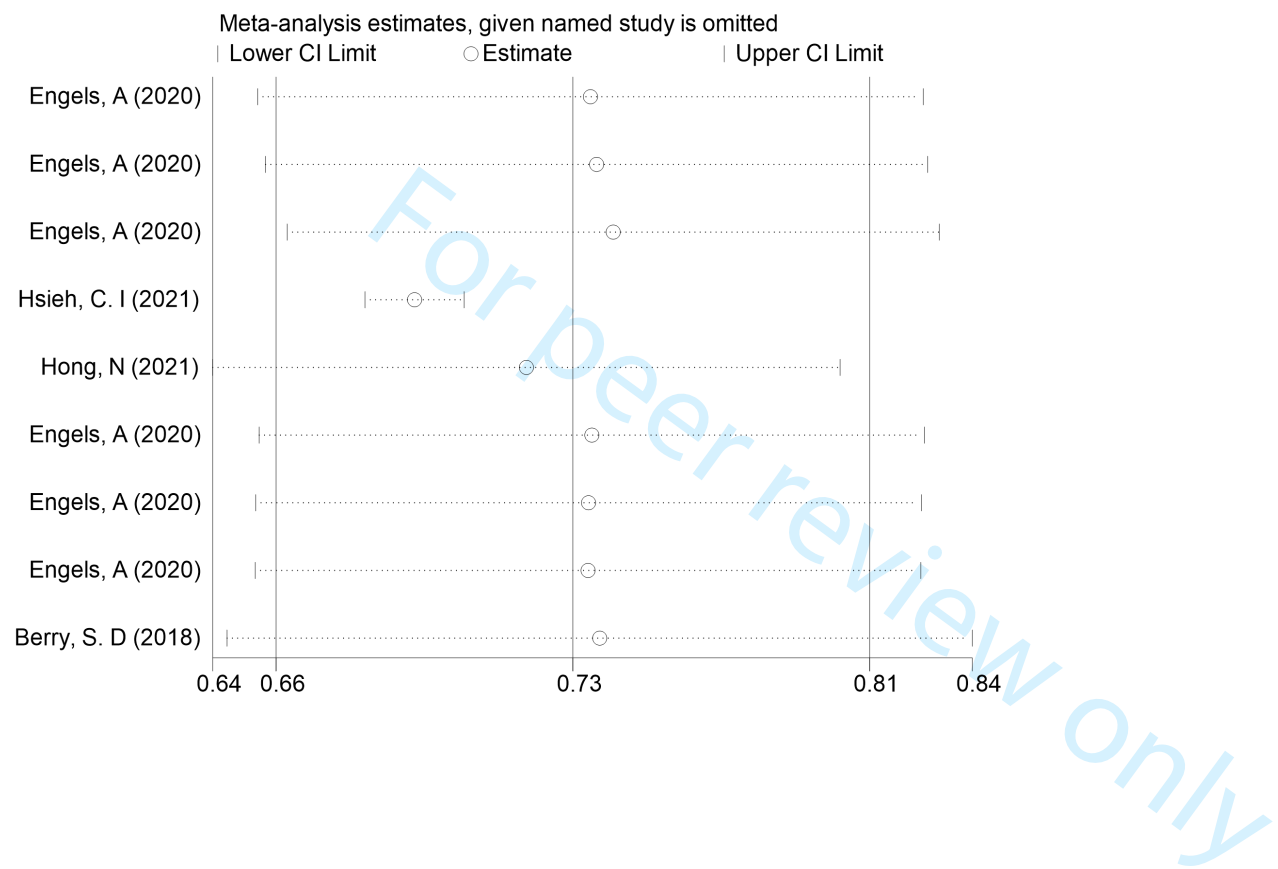

Supplement: bmjopen-2022-071430.draft_revisions.pdf [file bmjopen-2022-071430.draft_revisions.pdf]
