# Supplementary material for: Predictive value of machine learning on fracture risk in osteoporosis: a systematic review and meta-analysis
Source: PubMed Central journal article supplement — BMJ Open. 2023 Dec 8;13(12):e071430. doi: 10.1136/bmjopen-2022-071430 (PMC10728980; doi:10.1136/bmjopen-2022-071430), 2023-12-08

**Table S1 : PRISMA 2020 checklist**

| Section and Topic       | Item # | Checklist item                                                                                                                                                                                                                                                                                       | Location where item is reported |
|-------------------------|--------|------------------------------------------------------------------------------------------------------------------------------------------------------------------------------------------------------------------------------------------------------------------------------------------------------|---------------------------------|
| <b>TITLE</b>            |        |                                                                                                                                                                                                                                                                                                      |                                 |
| Title                   | 1      | Identify the report as a systematic review.                                                                                                                                                                                                                                                          | 1                               |
| <b>ABSTRACT</b>         |        |                                                                                                                                                                                                                                                                                                      |                                 |
| Abstract                | 2      | See the PRISMA 2020 for Abstracts checklist.                                                                                                                                                                                                                                                         | 2                               |
| <b>INTRODUCTION</b>     |        |                                                                                                                                                                                                                                                                                                      |                                 |
| Rationale               | 3      | Describe the rationale for the review in the context of existing knowledge.                                                                                                                                                                                                                          | 2-3                             |
| Objectives              | 4      | Provide an explicit statement of the objective(s) or question(s) the review addresses.                                                                                                                                                                                                               | 3                               |
| <b>METHODS</b>          |        |                                                                                                                                                                                                                                                                                                      |                                 |
| Eligibility criteria    | 5      | Specify the inclusion and exclusion criteria for the review and how studies were grouped for the syntheses.                                                                                                                                                                                          | 3                               |
| Information sources     | 6      | Specify all databases, registers, websites, organisations, reference lists and other sources searched or consulted to identify studies. Specify the date when each source was last searched or consulted.                                                                                            | 3                               |
| Search strategy         | 7      | Present the full search strategies for all databases, registers and websites, including any filters and limits used.                                                                                                                                                                                 | Table S2                        |
| Selection process       | 8      | Specify the methods used to decide whether a study met the inclusion criteria of the review, including how many reviewers screened each record and each report retrieved, whether they worked independently, and if applicable, details of automation tools used in the process.                     | 3, Figure 1                     |
| Data collection process | 9      | Specify the methods used to collect data from reports, including how many reviewers collected data from each report, whether they worked independently, any processes for obtaining or confirming data from study investigators, and if applicable, details of automation tools used in the process. | 3                               |
| Data items              | 10a    | List and define all outcomes for which data were sought. Specify whether all results that were compatible with each outcome domain in each study were sought (e.g. for all measures, time points,                                                                                                    | 3                               |

**Table S1 : PRISMA 2020 checklist**

| Section and Topic             | Item # | Checklist item                                                                                                                                                                                                                                                    | Location where item is reported |
|-------------------------------|--------|-------------------------------------------------------------------------------------------------------------------------------------------------------------------------------------------------------------------------------------------------------------------|---------------------------------|
|                               |        | analyses), and if not, the methods used to decide which results to collect.                                                                                                                                                                                       |                                 |
|                               | 10b    | List and define all other variables for which data were sought (e.g. participant and intervention characteristics, funding sources). Describe any assumptions made about any missing or unclear information.                                                      | Table S3, Table S4              |
| Study risk of bias assessment | 11     | Specify the methods used to assess risk of bias in the included studies, including details of the tool(s) used, how many reviewers assessed each study and whether they worked independently, and if applicable, details of automation tools used in the process. | 3-4, Figure 2                   |
| Effect measures               | 12     | Specify for each outcome the effect measure(s) (e.g. risk ratio, mean difference) used in the synthesis or presentation of results.                                                                                                                               | 4                               |
| Synthesis methods             | 13a    | Describe the processes used to decide which studies were eligible for each synthesis (e.g. tabulating the study intervention characteristics and comparing against the planned groups for each synthesis (item #5)).                                              | 4                               |
|                               | 13b    | Describe any methods required to prepare the data for presentation or synthesis, such as handling of missing summary statistics, or data conversions.                                                                                                             | 4                               |
|                               | 13c    | Describe any methods used to tabulate or visually display results of individual studies and syntheses.                                                                                                                                                            | 4                               |
|                               | 13d    | Describe any methods used to synthesize results and provide a rationale for the choice(s). If meta-analysis was performed, describe the model(s), method(s) to identify the presence and extent of statistical heterogeneity, and software package(s) used.       | 3-4                             |
|                               | 13e    | Describe any methods used to explore possible causes of heterogeneity among study results (e.g. subgroup analysis, meta-regression).                                                                                                                              | Table2, Table3                  |
|                               | 13f    | Describe any sensitivity analyses conducted to assess robustness of the synthesized results.                                                                                                                                                                      | 3                               |
| Reporting bias                | 14     | Describe any methods used to assess risk of bias due to missing results in a synthesis (arising from                                                                                                                                                              | 3                               |

**Table S1 : PRISMA 2020 checklist**

| Section and Topic             | Item # | Checklist item                                                                                                                                                                                                                                                                       | Location where item is reported |
|-------------------------------|--------|--------------------------------------------------------------------------------------------------------------------------------------------------------------------------------------------------------------------------------------------------------------------------------------|---------------------------------|
| assessment                    |        | reporting biases).                                                                                                                                                                                                                                                                   |                                 |
| Certainty assessment          | 15     | Describe any methods used to assess certainty (or confidence) in the body of evidence for an outcome.                                                                                                                                                                                | 4                               |
| <b>RESULTS</b>                |        |                                                                                                                                                                                                                                                                                      |                                 |
| Study selection               | 16a    | Describe the results of the search and selection process, from the number of records identified in the search to the number of studies included in the review, ideally using a flow diagram.                                                                                         | 4                               |
|                               | 16b    | Cite studies that might appear to meet the inclusion criteria, but which were excluded, and explain why they were excluded.                                                                                                                                                          | Figure 1                        |
| Study characteristics         | 17     | Cite each included study and present its characteristics.                                                                                                                                                                                                                            | 4, Table S3                     |
| Risk of bias in studies       | 18     | Present assessments of risk of bias for each included study.                                                                                                                                                                                                                         | 6, Figure 2, Table S5           |
| Results of individual studies | 19     | For all outcomes, present, for each study: (a) summary statistics for each group (where appropriate) and (b) an effect estimate and its precision (e.g. confidence/credible interval), ideally using structured tables or plots.                                                     | 6, Table 2, Table 3             |
| Results of syntheses          | 20a    | For each synthesis, briefly summarise the characteristics and risk of bias among contributing studies.                                                                                                                                                                               | 6                               |
|                               | 20b    | Present results of all statistical syntheses conducted. If meta-analysis was done, present for each the summary estimate and its precision (e.g. confidence/credible interval) and measures of statistical heterogeneity. If comparing groups, describe the direction of the effect. | 6, Table 2                      |
|                               | 20c    | Present results of all investigations of possible causes of heterogeneity among study results.                                                                                                                                                                                       | 6-7, Table 2                    |
|                               | 20d    | Present results of all sensitivity analyses conducted to assess the robustness of the synthesized results.                                                                                                                                                                           | 6-8, Table 3                    |
| Reporting biases              | 21     | Present assessments of risk of bias due to missing results (arising from reporting biases) for each synthesis assessed.                                                                                                                                                              | 6, Figure 2                     |
| Certainty of evidence         | 22     | Present assessments of certainty (or confidence) in the body of evidence for each outcome assessed.                                                                                                                                                                                  | Table 2, Table 3                |

**Table S1 : PRISMA 2020 checklist**

| Section and Topic                              | Item # | Checklist item                                                                                                                                                                                                                             | Location where item is reported         |
|------------------------------------------------|--------|--------------------------------------------------------------------------------------------------------------------------------------------------------------------------------------------------------------------------------------------|-----------------------------------------|
| <b>DISCUSSION</b>                              |        |                                                                                                                                                                                                                                            |                                         |
| Discussion                                     | 23a    | Provide a general interpretation of the results in the context of other evidence.                                                                                                                                                          | 8-10                                    |
|                                                | 23b    | Discuss any limitations of the evidence included in the review.                                                                                                                                                                            | 8-10                                    |
|                                                | 23c    | Discuss any limitations of the review processes used.                                                                                                                                                                                      | 8-10                                    |
|                                                | 23d    | Discuss implications of the results for practice, policy, and future research.                                                                                                                                                             | 10                                      |
| <b>OTHER INFORMATION</b>                       |        |                                                                                                                                                                                                                                            |                                         |
| Registration and protocol                      | 24a    | Provide registration information for the review, including register name and registration number, or state that the review was not registered.                                                                                             | 4,Registration No. CRD42022346896       |
|                                                | 24b    | Indicate where the review protocol can be accessed, or state that a protocol was not prepared.                                                                                                                                             | The protocol was registered on PROSPERO |
|                                                | 24c    | Describe and explain any amendments to information provided at registration or in the protocol.                                                                                                                                            | NA                                      |
| Support                                        | 25     | Describe sources of financial or non-financial support for the review, and the role of the funders or sponsors in the review.                                                                                                              | 10                                      |
| Competing interests                            | 26     | Declare any competing interests of review authors.                                                                                                                                                                                         | 11                                      |
| Availability of data, code and other materials | 27     | Report which of the following are publicly available and where they can be found: template data collection forms; data extracted from included studies; data used for all analyses; analytic code; any other materials used in the review. | Table S3,Table S4                       |

From: Page MJ, McKenzie JE, Bossuyt PM, Boutron I, Hoffmann TC, Mulrow CD, et al. The PRISMA 2020 statement: an updated guideline for reporting systematic reviews. *BMJ* 2021;372:n71. doi: 10.1136/bmj.n71

**Table S2** Literature search strategy**1.Pubmed**

| Search number | Query                                                                                                                                                                                                                                                                                                                                                                                                                                                                                                                                                                                                                                                 | Results |
|---------------|-------------------------------------------------------------------------------------------------------------------------------------------------------------------------------------------------------------------------------------------------------------------------------------------------------------------------------------------------------------------------------------------------------------------------------------------------------------------------------------------------------------------------------------------------------------------------------------------------------------------------------------------------------|---------|
| #1            | "Osteoporosis"[Mesh]                                                                                                                                                                                                                                                                                                                                                                                                                                                                                                                                                                                                                                  | 62,328  |
| #2            | "Osteoporosis"[Title/Abstract] OR "Osteoporoses"[Title/Abstract] OR "bone loss age related"[Title/Abstract] OR "age related bone loss"[Title/Abstract] OR "age related bone losses"[Title/Abstract] OR "bone loss age related"[Title/Abstract] OR (((("bone and bones"[MeSH Terms] OR ("Bone"[All Fields] AND "bones"[All Fields]) OR "bone and bones"[All Fields] OR "Bone"[All Fields]) AND "Losses"[All Fields]) AND "Age-Related"[Title/Abstract])                                                                                                                                                                                                | 82,879  |
| #3            | "Osteoporosis"[MeSH Terms] OR ("Osteoporosis"[Title/Abstract] OR "Osteoporoses"[Title/Abstract] OR "bone loss age related"[Title/Abstract] OR "age related bone loss"[Title/Abstract] OR "age related bone losses"[Title/Abstract] OR "bone loss age related"[Title/Abstract] OR (((("bone and bones"[MeSH Terms] OR ("Bone"[All Fields] AND "bones"[All Fields]) OR "bone and bones"[All Fields] OR "Bone"[All Fields]) AND "Losses"[All Fields]) AND "Age-Related"[Title/Abstract]))                                                                                                                                                                | 100,673 |
| #4            | "Machine Learning"[Mesh]                                                                                                                                                                                                                                                                                                                                                                                                                                                                                                                                                                                                                              | 55,536  |
| #5            | "machine learning"[Title/Abstract] OR "transfer learning"[Title/Abstract] OR "deep learning"[Title/Abstract] OR "prediction model"[Title/Abstract] OR "artificial intelligence"[Title/Abstract] OR "random forest"[Title/Abstract] OR "artificial neural network"[Title/Abstract] OR "ANN"[Title/Abstract] OR "support vector machine"[Title/Abstract] OR "SVM"[Title/Abstract] OR "gradient boosting machine"[Title/Abstract] OR "GBM"[Title/Abstract] OR "Nomogram"[Title/Abstract] OR "XGboost"[Title/Abstract] OR "Logistic"[Title/Abstract] OR "decision tree"[Title/Abstract] OR "external validation"[Title/Abstract] OR "cox"[Title/Abstract] | 708,017 |
| #6            | "Machine Learning"[MeSH Terms] OR "Machine Learning"[Title/Abstract] OR "transfer learning"[Title/Abstract] OR "deep learning"[Title/Abstract] OR "prediction model"[Title/Abstract] OR "artificial intelligence"[Title/Abstract] OR "random forest"[Title/Abstract] OR "artificial neural network"[Title/Abstract] OR "ANN"[Title/Abstract] OR "support vector machine"[Title/Abstract] OR                                                                                                                                                                                                                                                           | 869,928 |

|     |                                                                                                                                                                                                                                                                                             |         |
|-----|---------------------------------------------------------------------------------------------------------------------------------------------------------------------------------------------------------------------------------------------------------------------------------------------|---------|
|     | "SVM"[Title/Abstract] OR "gradient boosting machine"[Title/Abstract] OR "GBM"[Title/Abstract] OR "Nomogram"[Title/Abstract] OR "XGboost"[Title/Abstract] OR "Logistic"[Title/Abstract] OR "decision tree"[Title/Abstract] OR "external validation"[Title/Abstract] OR "cox"[Title/Abstract] |         |
| #7  | "fractures, bone"[MeSH]                                                                                                                                                                                                                                                                     | 299,700 |
| #8  | "fractures bone"[Title/Abstract] OR "broken bones"[Title/Abstract] OR "bone broken"[Title/Abstract] OR "bones broken"[Title/Abstract] OR "broken bone"[Title/Abstract] OR "Fractures"[Title/Abstract] OR "Fracture"[Title/Abstract]                                                         | 343,051 |
| #9  | "fractures, bone"[MeSH Terms] OR "fractures bone"[Title/Abstract] OR "broken bones"[Title/Abstract] OR "bone broken"[Title/Abstract] OR "bones broken"[Title/Abstract] OR "broken bone"[Title/Abstract] OR "Fractures"[Title/Abstract] OR "Fracture"[Title/Abstract]                        | 325,361 |
| #10 | #3 AND #6 AND #9                                                                                                                                                                                                                                                                            | 2,409   |

## 2.Cochrane

| Search number | Query                                                                                                                                                             | Results |
|---------------|-------------------------------------------------------------------------------------------------------------------------------------------------------------------|---------|
| #1            | MeSH descriptor: [Osteoporosis] explode all trees                                                                                                                 | 5,754   |
| #2            | (Osteoporosis):ti,ab,kw OR (Osteoporoses):ti,ab,kw OR (Bone Loss, Age-Related):ti,ab,kw OR (Age-Related Bone Loss):ti,ab,kw OR (Age-Related Bone Losses):ti,ab,kw | 11,868  |
| #3            | (Bone Loss, Age Related):ti,ab,kw OR (Bone Losses, Age-Related):ti,ab,kw                                                                                          | 549     |
| #4            | #1 OR #2 OR #3                                                                                                                                                    | 12,188  |
| #5            | MeSH descriptor: [Machine Learning] explode all trees                                                                                                             | 866     |
| #6            | (machine learning):ti,ab,kw OR (Transfer Learning):ti,ab,kw OR (Deep learning):ti,ab,kw OR (Prediction model):ti,ab,kw OR (artificial intelligence):ti,ab,kw      | 10,742  |
| #7            | (random forest):ti,ab,kw OR (artificial neural network):ti,ab,kw OR (ANN):ti,ab,kw OR (Support vector machine):ti,ab,kw OR (SVM):ti,ab,kw                         | 3,194   |
| #8            | (Gradient Boosting Machine):ti,ab,kw OR (GBM):ti,ab,kw OR (Nomogram):ti,ab,kw OR (XGboost):ti,ab,kw OR (Logistic):ti,ab,kw                                        | 32,161  |

|     |                                                                                                                                        |        |
|-----|----------------------------------------------------------------------------------------------------------------------------------------|--------|
| #9  | (Decision tree):ti,ab,kw OR (External validation):ti,ab,kw                                                                             | 2,025  |
| #10 | #5 OR #6 OR #7 OR #8 OR #9                                                                                                             | 43,070 |
| #11 | MeSH descriptor: [Fractures, Bone] explode all trees                                                                                   | 8,166  |
| #12 | (Fractures, Bone):ti,ab,kw OR (Broken Bones):ti,ab,kw OR (Bone, Broken):ti,ab,kw OR (Bones, Broken):ti,ab,kw OR (Broken Bone):ti,ab,kw | 9,471  |
| #13 | (Fractures):ti,ab,kw OR (Fracture):ti,ab,kw                                                                                            | 27,252 |
| #14 | #11 OR #12 OR #13                                                                                                                      | 27,386 |
| #15 | #4 AND #10 AND #14                                                                                                                     | 170    |

### 3.Embase

| Search number | Query                                                                                                                                                                                                                                                                                                                                                                                                                                                 | Results   |
|---------------|-------------------------------------------------------------------------------------------------------------------------------------------------------------------------------------------------------------------------------------------------------------------------------------------------------------------------------------------------------------------------------------------------------------------------------------------------------|-----------|
| #1            | 'osteoporosis'/exp                                                                                                                                                                                                                                                                                                                                                                                                                                    | 152,054   |
| #2            | 'osteoporosis':ab,ti OR 'osteoporoses':ab,ti OR 'bone loss, age-related':ab,ti OR 'age-related bone loss':ab,ti OR 'age-related bone losses':ab,ti OR 'bone loss, age related':ab,ti OR 'bone losses, age-related':ab,ti                                                                                                                                                                                                                              | 121,472   |
| #3            | #1 OR #2                                                                                                                                                                                                                                                                                                                                                                                                                                              | 176,124   |
| #4            | 'machine learning'/exp                                                                                                                                                                                                                                                                                                                                                                                                                                | 377,384   |
| #5            | 'machine learning':ab,ti OR 'transfer learning':ab,ti OR 'deep learning':ab,ti OR 'prediction model':ab,ti OR 'artificial intelligence':ab,ti OR 'random forest':ab,ti OR 'artificial neural network':ab,ti OR ann:ab,ti OR 'support vector machine':ab,ti OR svm:ab,ti OR 'gradient boosting machine':ab,ti OR gbm:ab,ti OR nomogram:ab,ti OR xgboost:ab,ti OR logistic:ab,ti OR 'decision tree':ab,ti OR 'external validation':ab,ti OR 'cox':ab,ti | 1,265,200 |
| #6            | #4 OR #5                                                                                                                                                                                                                                                                                                                                                                                                                                              | 1,485,765 |
| #7            | 'fracture'/exp                                                                                                                                                                                                                                                                                                                                                                                                                                        | 383,399   |
| #8            | 'fractures, bone':ab,ti OR 'broken bones':ab,ti OR 'bone, broken':ab,ti OR 'bones, broken':ab,ti OR 'broken bone':ab,ti OR 'fractures':ab,ti OR 'fracture':ab,ti                                                                                                                                                                                                                                                                                      | 363,644   |

|     |                  |         |
|-----|------------------|---------|
| #9  | #7 OR #8         | 471,174 |
| #10 | #3 AND #6 AND #9 | 4,387   |

#### 4. Web of science

| Search number | Query                                                                                                                                                                                                                                                                                                                                                                                                                                                             | Results   |
|---------------|-------------------------------------------------------------------------------------------------------------------------------------------------------------------------------------------------------------------------------------------------------------------------------------------------------------------------------------------------------------------------------------------------------------------------------------------------------------------|-----------|
| #1            | Osteoporosis (Topic) or Osteoporoses (Topic) or Bone Loss, Age-Related (Topic) or Age-Related Bone Loss (Topic) or Age-Related Bone Losses (Topic) or Bone Loss, Age Related (Topic) or Bone Losses, Age-Related (Topic)                                                                                                                                                                                                                                          | 210,210   |
| #2            | machine learning (Topic) or Transfer Learning (Topic) or Deep learning (Topic) or Prediction model (Topic) or artificial intelligence (Topic) or random forest (Topic) or artificial neural network (Topic) or ANN (Topic) or Support vector machine (Topic) or SVM (Topic) or Gradient Boosting Machine (Topic) or GBM (Topic) or Nomogram (Topic) or XGboost (Topic) or Logistic (Topic) or Decision tree (Topic) or External validation (Topic) or Cox (Topic) | 3,698,410 |
| #3            | Fractures, Bone (Topic) or Broken Bones (Topic) or Bone, Broken (Topic) or Bones, Broken (Topic) or Broken Bone (Topic) or Fractures (Topic) or Fracture (Topic)                                                                                                                                                                                                                                                                                                  | 1,302,805 |
| #4            | #1 AND #2 AND #3                                                                                                                                                                                                                                                                                                                                                                                                                                                  | 5,502     |



**Table S3** Characteristics of included studies in meta-analysis

| Author              | Year | Country     | Data source              | Sample population type | Mean age, years | Fracture site | Total sample, n | Validation Method | ML method                   | Model evaluation metrics                      |
|---------------------|------|-------------|--------------------------|------------------------|-----------------|---------------|-----------------|-------------------|-----------------------------|-----------------------------------------------|
| Wu, Q[15]           | 2020 | USA         | gene database            | men                    | 74.8            | multiple      | 5130            | internal          | LR<br>ANN<br>RF<br>BT<br>LR | AUC<br>Sensitivity<br>Specificity<br>Accuracy |
| Villamor, E[16]     | 2020 | Spain       | clinical hospital        | women                  | 81.4            | hip           | 137             | internal          | SVM<br>ANN<br>RF            | Accuracy                                      |
| Van Geel, Tacm[17]  | 2011 | Netherlands | questionnaire collection | women                  | 62              | vertebral     | 2372            | -                 | SM                          | AUC                                           |
| Ulivieri, F. M[18]  | 2021 | Italy       | clinical hospital        | patient                | 48.5            | vertebral     | 90              | -                 | ANN                         | Sensitivity<br>Specificity<br>Accuracy<br>ROC |
| Yoda, T[19]         | 2021 | Japan       | clinical hospital        | patient                | 77.6            | vertebral     | 97              | internal          | CNN                         | AUC<br>Sensitivity<br>Specificity             |
| Jiang, X. Z[20]     | 2013 | USA         | clinical hospital        | women                  | 61.4            | multiple      | 615             | -                 | LR                          | AUC<br>Sensitivity<br>Specificity<br>Accuracy |
| Schousboe, J. T[21] | 2014 | USA         | clinical hospital        | women                  | 75              | vertebral     | 7233            | -                 | LR                          | AUC<br>ROC                                    |
| Sandhu, S. K[22]    | 2010 | Australia   | electronic health record | patient                | 74              | multiple      | 200             | -                 | LR                          | AUC                                           |
| Rubin, K. H[23]     | 2018 | Denmark     | administrative           | subjects               | 61.4            | multiple      | 2495339         | internal          | LR                          | AUC<br>ROC<br>Accuracy<br>PPV<br>NPV          |
| Pluskiewicz, W[24]  | 2010 | Poland      | osteoporosis registry    | women                  | 68.5            | multiple      | 2012            | -                 | LR                          | ROC<br>AUC                                    |
| Jang, E. J[25]      | 2016 | Korea       | questionnaire collection | subjects               | 61              | multiple      | 768             | -                 | LR                          | C-statistics                                  |

|                       |      |           |                          |          |      |           |        |          |          |                                                                           |
|-----------------------|------|-----------|--------------------------|----------|------|-----------|--------|----------|----------|---------------------------------------------------------------------------|
| Barret A. Monchka[26] | 2021 | Canada    | osteoporosis registry    | subjects | 75   | vertebral | 12742  | internal | CNN      | AUC<br>Sensitivity<br>Specificity<br>Accuracy<br>PPV<br>NPV<br>AUC<br>ROC |
| Mehta, S. D[27]       | 2020 | USA       | clinical hospital        | patient  | 69   | vertebral | 307    | internal | SVM      | Sensitivity<br>Specificity<br>Accuracy<br>PPV<br>NPV                      |
| Langsetmo, L[28]      | 2011 | Canada    | questionnaire collection | subjects | 67.6 | multiple  | 5758   | internal | SM       | C-Statistics<br>ROC                                                       |
| Ioannidis, G[29]      | 2017 | Canada    | electronic health record | subjects | 61   | multiple  | 29848  | internal | DT<br>LR | C-statistics                                                              |
| K. K. Nishiyama[30]   | 2013 | Canada    | questionnaire collection | women    | 73   | multiple  | 116    | internal | SVM      | ROC<br>AUC<br>Sensitivity<br>Specificity<br>Accuracy<br>ROC               |
| Kruse, C[31]          | 2017 | Denmark   | administrative           | subjects | 60.8 | hip       | 7252   | internal | DT<br>NB | AUC<br>Sensitivity<br>Specificity<br>ROC                                  |
| Kolanu, N[32]         | 2021 | Australia | electronic health record | patient  | 73.4 | multiple  | 5416   | external | ANN      | AUC<br>Sensitivity<br>Specificity                                         |
| Kim, H. Y[33]         | 2016 | Korea     | administrative           | subjects | 60   | multiple  | 718508 | internal | SM       | C-statistics<br>AUC<br>ROC                                                |
| Hsieh, C. I[34]       | 2021 | China     | clinical hospital        | patient  | 72.2 | hip       | 36279  | external | Other DL | Sensitivity<br>Specificity<br>Accuracy<br>PPV<br>NPV                      |
| Hong, N[35]           | 2021 | Korea     | clinical hospital        | women    | 73   | hip       | 2462   | internal | SM       | C-statistics                                                              |

|                       |      |                 |                          |         |      |           |       |          |                                      |                                          |
|-----------------------|------|-----------------|--------------------------|---------|------|-----------|-------|----------|--------------------------------------|------------------------------------------|
| Ho-Le, T. P[36]       | 2017 | Australia       | osteoporosis registry    | women   | 69.1 | hip       | 1167  | external | BT<br>SVM<br>ANN<br>LR<br>kNN<br>SVM | AUC<br>Sensitivity<br>Specificity        |
| Henry, M. J[37]       | 2011 | Australia       | osteoporosis registry    | women   | 74   | multiple  | 600   | -        | LR                                   | AUC<br>ROC<br>Sensitivity<br>Specificity |
| Galassi, A[38]        | 2020 | Spain           | electronic health record | women   | 81.4 | hip       | 137   | internal | DT<br>LR<br>RF<br>SVM                | Sensitivity<br>Specificity<br>Accuracy   |
| FitzGerald, G[39]     | 2014 | California      | questionnaire collection | women   | 67   | multiple  | 47429 | -        | SM                                   | C-statistics                             |
| Ferizi, U[40]         | 2019 | USA             | osteoporosis registry    | women   | 62   | multiple  | 92    | -        | LR<br>BT<br>kNN<br>SVM<br>NB         | AUC<br>ROC<br>Sensitivity<br>Specificity |
| Enns-Bray, W. S[41]   | 2019 | USA             | clinical hospital        | women   | 77.2 | hip       | 254   | -        | LR                                   | AUC<br>ROC                               |
| Engels, A[42]         | 2020 | Germany         | administrative           | patient | 75.6 | hip       | 78074 | internal | SVM<br>RF<br>LR<br>Ensemble learning | AUC<br>ROC                               |
| De Vries, B. C. S[43] | 2021 | The Netherlands | clinical hospital        | patient | 68   | multiple  | 9348  | internal | BT<br>ANN<br>RF<br>SM                | C-statistics                             |
| Cheung, E. Y[44]      | 2012 | China           | electronic health record | women   | 62   | multiple  | 2266  | -        | SM                                   | AUC<br>ROC<br>Sensitivity<br>Specificity |
| Chanplakorn, P[45]    | 2021 | Thailand        | osteoporosis registry    | women   | 68.5 | vertebral | 617   | -        | SM                                   | AUC<br>ROC                               |
| Bredbenner, T.        | 2014 | USA             | clinical hospital        | men     | 65   | hip       | 922   | internal | LR                                   | AUC                                      |

|                        |      |          |                          |          |      |           |         |                       |           |  |                                                                        |
|------------------------|------|----------|--------------------------|----------|------|-----------|---------|-----------------------|-----------|--|------------------------------------------------------------------------|
| L[46]                  |      |          |                          |          |      |           |         |                       |           |  | ROC<br>AUC<br>ROC                                                      |
| Beyaz, S[47]           | 2020 | Turkey   | osteoporosis registry    | patient  | 74.9 | multiple  | 2106    | -                     | ANN       |  | Sensitivity<br>Specificity<br>Accuracy<br>C-statistics                 |
| Berry, S. D[48]        | 2018 | USA      | administrative           | subjects | 84   | hip       | 1278304 | external              | SM        |  | C-statistics                                                           |
| Beaudoin, C[49]        | 2021 | Canada   | administrative           | subjects | 75.1 | multiple  | 581281  | internal              | SM        |  | C-statistics                                                           |
| Baleanu, F[50]         | 2022 | Belgium  | clinical hospital        | women    | 70.1 | multiple  | 3560    | -                     | LR        |  | AUC<br>ROC<br>AUC<br>ROC                                               |
| Almog, Y. A[51]        | 2020 | USA      | electronic health record | patient  | 50   | vertebral | 9806205 | internal              | ANN       |  | Sensitivity<br>Specificity<br>AUC<br>ROC<br>Sensitivity<br>Specificity |
| Zagorski, P[52]        | 2021 | Poland   | questionnaire collection | women    | 65.2 | hip       | 389     | -                     | LR        |  | ROC<br>Sensitivity<br>Specificity<br>PPV<br>NPV                        |
| Diez-Perez, A[53]      | 2007 | Spain    | questionnaire collection | women    | 72.3 | multiple  | 5201    | -                     | SM        |  | AUC<br>ROC<br>AUC<br>ROC                                               |
| Lix, L. M[54]          | 2018 | Canada   | osteoporosis registry    | women    | 65.6 | multiple  | 31999   | -                     | LR        |  | AUC<br>ROC                                                             |
| Li, Q. J[55]           | 2021 | China    | clinical hospital        | patient  | 70   | multiple  | 562     | internal and external | LR        |  | C-statistics                                                           |
| Lee, S[56]             | 2008 | Korea    | osteoporosis registry    | women    | 65   | multiple  | 94      | -                     | SVM       |  | Sensitivity<br>Specificity<br>AUC<br>ROC                               |
| Jacobs, J. W. G[57]    | 2010 | Portugal | questionnaire collection | subjects | 66   | vertebral | 314     | -                     | LR        |  | Sensitivity<br>Specificity<br>AUC<br>ROC                               |
| Eller-Vainicher, C[58] | 2011 | Italy    | questionnaire collection | women    | 68   | vertebral | 372     | -                     | ANN<br>LR |  | Sensitivity<br>Specificity                                             |

|                       |      |        |                             |          |      |           |      |          |                                  |                                                                                       |
|-----------------------|------|--------|-----------------------------|----------|------|-----------|------|----------|----------------------------------|---------------------------------------------------------------------------------------|
| Zhong, B.<br>Y[59]    | 2017 | China  | clinical hospital           | patient  | 72   | vertebral | 421  | internal | SM                               | Accuracy<br>C-statistics                                                              |
| Xiao, X[60]           | 2021 | USA    | gene database               | women    | 64.5 | hip       | 699  | -        | SM<br>SVM<br>RF                  | AUC<br>Accuracy<br>Specificity<br>Recall<br>Precision                                 |
| Du,J[61]              | 2022 | China  | clinical hospital           | subjects | 71   | femur     | 120  | -        | DT<br>AdaBoost<br>ANN<br>XGBoost | Accuracy<br>Specificity<br>Recall<br>Precision                                        |
| Wang,M[62]            | 2022 | China  | clinical hospital           | subjects | 73.4 | vertebral | 7906 | -        | XGBoost<br>SM                    | AUC<br>AUC<br>ROC<br>Sensitivity<br>Specificity                                       |
| Dong,Q[63]            | 2022 | USA    | clinical hospital           | men      | 73.7 | vertebral | 3792 | internal | Other DL                         | PPV<br>NPV<br>FDR<br>F1 score<br>Accuracy<br>AUC<br>ROC<br>Specificity<br>Sensitivity |
| Wen,Z[64]             | 2022 | China  | clinical hospital           | patient  | 73.5 | vertebral | 270  | internal | LR                               | PPV<br>NPV<br>Diagnostic<br>efficiency                                                |
| Pluskiewicz,W<br>[65] | 2023 | Poland | questionnaire<br>collection | women    | 66.4 | multiple  | 640  | -        | LR                               | AUC                                                                                   |
| Kong,X[66]            | 2022 | China  | clinical hospital           | patient  | 55.1 | multiple  | 1730 | -        | SM                               | AUC<br>NRI<br>IDI                                                                     |
| Agarwal,A[67]         | 2023 | Canada | electronic health<br>record | women    | 70.7 | multiple  | 9716 | external | SM                               | AUC<br>ROC                                                                            |

\*LR: Logistic Regression;ANN:artificial neural network;SVM = support-vector machine; CNN:convolutional neural network; kNN: k-nearest neighbors; RF: random forests;DT:decision tree;NB:Naive Bayes;BT:Boosted tree;SM:Survival model;DL:deep learning model;AUC:area under the receiver operating

characteristic curve;ROC:receiver operating characteristic;PPV:positive predictive value;NPV:negative predictive value;FDR:R false discovery rate;NRI:net reclassification index; IDI:integrated discrimination improvement.

**Table S4** Methodological characteristics of machine learning models developed for outcome prediction in patients with Osteoporosis

| Author      | Year | Data set | Gender | Fracture site      | Events | Sample size | Model type | Verification method      | Missing value processing | C-index | Sensitivity | Specificity | Accuracy |
|-------------|------|----------|--------|--------------------|--------|-------------|------------|--------------------------|--------------------------|---------|-------------|-------------|----------|
| Wu, Q       | 2020 | Train    | M      | Multiple fractures | 361    | 4104        | LR         | 10-fold cross validation | Median interpolation     |         |             |             |          |
| Wu, Q       | 2020 | Train    | M      | Multiple fractures | 361    | 4104        | RF         | 10-fold cross validation | Median interpolation     |         |             |             |          |
| Wu, Q       | 2020 | Train    | M      | Multiple fractures | 361    | 4104        | BT         | 10-fold cross validation | Median interpolation     |         |             |             |          |
| Wu, Q       | 2020 | Train    | M      | Multiple fractures | 361    | 4104        | ANN        | 10-fold cross validation | Median interpolation     |         |             |             |          |
| Wu, Q       | 2020 | Test     | M      | Multiple fractures | 90     | 1026        | LR         | 10-fold cross validation | Median interpolation     | 0.6410  | 0.7610      | 0.4420      | 0.6980   |
| Wu, Q       | 2020 | Test     | M      | Multiple fractures | 90     | 1026        | RF         | 10-fold cross validation | Median interpolation     | 0.7005  | 0.7000      | 0.4670      | 0.7590   |
| Wu, Q       | 2020 | Test     | M      | Multiple fractures | 90     | 1026        | BT         | 10-fold cross validation | Median interpolation     | 0.7100  | 0.5650      | 0.6930      | 0.8840   |
| Wu, Q       | 2020 | Test     | M      | Multiple fractures | 90     | 1026        | ANN        | 10-fold cross validation | Median interpolation     | 0.6910  | 0.7120      | 0.5980      | 0.8390   |
| Villamor, E | 2020 | Train    | F      | Hip fracture       | 65     | 101         | LR         | 10-fold cross validation |                          |         |             |             | 0.7669   |
| Villamor, E | 2020 | Train    | F      | Hip fracture       | 65     | 101         | SVM        | 10-fold cross validation |                          |         |             |             | 0.7569   |

| Author          | Year | Data set | Gender | Fracture site      | Events | Sample size | Model type | Verification method      | Missing value processing | C-index | Sensitivity | Specificity | Accuracy |
|-----------------|------|----------|--------|--------------------|--------|-------------|------------|--------------------------|--------------------------|---------|-------------|-------------|----------|
| Villamor, E     | 2020 | Train    | F      | Hip fracture       | 65     | 101         | ANN        | 10-fold cross validation |                          |         |             |             | 0.7642   |
| Villamor, E     | 2020 | Train    | F      | Hip fracture       | 65     | 101         | RF         | 10-fold cross validation |                          |         |             |             | 0.6940   |
| Villamor, E     | 2020 | Test     | F      | Hip fracture       | 65     | 101         | LR         | 10-fold cross validation |                          |         |             |             | 0.7309   |
| Villamor, E     | 2020 | Test     | F      | Hip fracture       | 65     | 101         | SVM        | 10-fold cross validation |                          |         |             |             | 0.7835   |
| Villamor, E     | 2020 | Test     | F      | Hip fracture       | 65     | 101         | ANN        | 10-fold cross validation |                          |         |             |             | 0.6940   |
| Villamor, E     | 2020 | Test     | F      | Hip fracture       | 65     | 101         | RF         | 10-fold cross validation |                          |         |             |             | 0.7334   |
| van Geel, Tacm  | 2011 | Train    | F      | Vertebral fracture | 382    | 2372        | SM         | Bootstrapping            |                          |         |             |             |          |
| Ulivieri, F. M  | 2021 | Train    | F      | Vertebral fracture | 56     | 90          | ANN        |                          |                          | 0.8300  | 0.7500      | 0.8372      |          |
| Yoda, T         | 2021 | Train    | M+F    | Vertebral fracture | 28     | 50          | CNN        | 5-fold cross validation  |                          | 0.9670  | 0.9250      | 0.9490      | 0.9380   |
| Yoda, T         | 2021 | Test     | M+F    | Vertebral fracture | 21     | 47          | CNN        | 5-fold cross validation  |                          | 0.9840  | 0.9810      | 0.9490      | 0.9640   |
| Jiang, X. Z     | 2013 | Train    | F      | Multiple fractures | 15     | 615         | LR         |                          |                          | 0.7600  | 0.8100      | 0.4700      | 0.5100   |
| Schousboe, J. T | 2014 | Train    | F      | Vertebral fracture | 2883   | 7233        | LR         |                          |                          | 0.6790  |             |             |          |



| Author            | Year | Data set | Gender | Fracture site      | Events | Sample size | Model type | Verification method      | Missing value processing | C-index | Sensitivity | Specificity | Accuracy |
|-------------------|------|----------|--------|--------------------|--------|-------------|------------|--------------------------|--------------------------|---------|-------------|-------------|----------|
| Sandhu, S. K      | 2010 | Train    | F      | Multiple fractures | 47     | 144         | LR         |                          |                          | 0.8400  | 0.7800      | 0.8000      |          |
| Sandhu, S. K      | 2010 | Train    | M      | Multiple fractures | 18     | 56          | LR         |                          |                          | 0.7600  | 0.7400      | 0.8000      |          |
| Rubin, K. H       | 2018 | Train    | F      | Multiple fractures | 11898  | 647103      | LR         |                          |                          | 0.7500  | 0.7520      | 0.5650      |          |
| Rubin, K. H       | 2018 | Train    | M      | Multiple fractures | 11851  | 647103      | LR         |                          |                          | 0.7520  | 0.6450      | 0.6090      |          |
| Rubin, K. H       | 2018 | Test     | F      | Multiple fractures | 4762   | 600567      | LR         |                          |                          | 0.8740  | 0.6000      | 0.6990      |          |
| Rubin, K. H       | 2018 | Test     | M      | Multiple fractures | 4776   | 600566      | LR         |                          |                          | 0.8510  | 0.6300      | 0.5840      |          |
| Pluskiewicz, W    | 2010 | Train    | F      | Hip fracture       | 1599   | 2012        | LR         |                          |                          | 0.850   | 0.7590      | 0.7370      |          |
| Pluskiewicz, W    | 2010 | Train    | F      | Multiple fractures | 1704   | 2012        | LR         |                          |                          | 0.8790  | 0.7390      | 0.5980      |          |
| Jang, E. J        | 2016 | Train    | M      | Multiple fractures | 36     | 363         | LR         |                          |                          | 0.7390  |             |             |          |
| Jang, E. J        | 2016 | Train    | F      | Multiple fractures | 50     | 405         | LR         |                          |                          | 0.7180  |             |             |          |
| Barret A. Monchka | 2021 | Train    | M+F    | Vertebral fracture | 1470   | 8920        | CNN        |                          |                          | 0.9500  | 0.8240      | 0.9430      | 0.9230   |
| Mehta, S. D       | 2020 | Train    | M+F    | Vertebral fracture | 86     | 246         | SVM        | 10-fold cross validation |                          | 0.9258  | 0.8950      | 0.9560      | 0.9350   |
| Mehta, S. D       | 2020 | Test     | M+F    | Vertebral fracture | 22     | 61          | SVM        | 10-fold cross validation |                          | 0.8963  | 0.8180      | 0.9740      | 0.9180   |
| Langsetmo, L      | 2011 | Test     | M      | Multiple fractures | 139    | 1606        | SM         |                          |                          | 0.7000  |             |             |          |

| Author          | Year | Data set | Gender | Fracture site      | Events | Sample size | Model type | Verification method      | Missing value processing | C-index | Sensitivity | Specificity | Accuracy |
|-----------------|------|----------|--------|--------------------|--------|-------------|------------|--------------------------|--------------------------|---------|-------------|-------------|----------|
| Langsetmo, L    | 2011 | Test     | F      | Multiple fractures | 672    | 4152        | SM         |                          |                          | 0.6900  |             |             |          |
| Ioannidis, G    | 2017 | Train    | M+F    | Multiple fractures | 3858   | 22386       | DT         |                          |                          | 0.6690  |             |             |          |
| Ioannidis, G    | 2017 | Test     | M+F    | Multiple fractures | 1294   | 7462        | DT         |                          |                          | 0.6870  |             |             |          |
| K. K. Nishiyama | 2013 | Train    | F      | Multiple fractures | 44     | 88          | SVM        | 10-fold cross validation |                          | 0.6800  | 0.5280      | 0.7970      | 0.6890   |
| K. K. Nishiyama | 2013 | Test     | F      | Multiple fractures | 14     | 28          | SVM        | 10-fold cross validation |                          | 0.8000  | 0.6880      | 0.8850      | 0.8100   |
| Kruse, C        | 2017 | Train    | F      | Hip fracture       | 293    | 4722        | NB         | 5-fold cross validation  | random forest imputation | 0.9200  | 0.8800      | 0.8100      |          |
| Kruse, C        | 2017 | Train    | M      | Hip fracture       | 47     | 717         | DT         | 5-fold cross validation  | random forest imputation | 0.8900  | 1.0000      | 0.6900      |          |
| Kolanu, N       | 2021 | Train    | M+F    | Multiple fractures | 433    | 5089        | ANN        |                          |                          |         | 0.9900      | 0.9950      |          |
| Kolanu, N       | 2021 | Test     | M+F    | Multiple fractures | 97     | 327         | ANN        |                          |                          |         | 0.6960      | 0.9500      |          |
| Kim, H. Y       | 2016 | Train    | M      | Multiple fractures | 4889   | 185127      | SM         |                          |                          | 0.6800  |             |             |          |
| Kim, H. Y       | 2016 | Train    | F      | Multiple fractures | 14951  | 174126      | SM         |                          |                          | 0.6500  |             |             |          |
| Kim, H. Y       | 2016 | Test     | M+F    | Multiple fractures | 19915  | 359255      | SM         |                          |                          | 0.6650  |             |             |          |
| Hsieh, C. I     | 2021 | Train    | M+F    | Hip fracture       | 2254   | 5164        | Other DL   | 4-fold cross validation  |                          | 0.9700  | 0.8820      | 0.9140      | 0.9000   |

| Author      | Year | Data set | Gender | Fracture site      | Events | Sample size | Model type | Verification method     | Missing value processing | C-index | Sensitivity | Specificity | Accuracy |
|-------------|------|----------|--------|--------------------|--------|-------------|------------|-------------------------|--------------------------|---------|-------------|-------------|----------|
| Hsieh, C. I | 2021 | Test     | M+F    | Hip fracture       | 922    | 2060        | Other DL   | 4-fold cross validation |                          | 0.9600  | 0.8990      | 0.9200      | 0.9100   |
| Hsieh, C. I | 2021 | Train    | M+F    | Vertebral fracture | 530    | 57662       | Other DL   | 4-fold cross validation |                          | 0.9700  | 0.6960      | 0.9790      | 0.9500   |
| Hsieh, C. I | 2021 | Test     | M+F    | Vertebral fracture | 922    | 3346        | Other DL   | 4-fold cross validation |                          | 0.9400  | 0.7400      | 0.9730      | 0.9480   |
| Hong, N     | 2021 | Train    | F      | Hip fracture       | 143    | 433         | RF         |                         |                          | 0.7840  |             |             | 0.7300   |
| Hong, N     | 2021 | Train    | F      | Hip fracture       | 143    | 433         | BT         |                         |                          | 0.7680  |             |             | 0.7200   |
| Hong, N     | 2021 | Train    | F      | Hip fracture       | 143    | 433         | SVM        |                         |                          | 0.7590  |             |             | 0.7400   |
| Hong, N     | 2021 | Train    | F      | Hip fracture       | 143    | 433         | BT         |                         |                          | 0.7580  |             |             | 0.7300   |
| Hong, N     | 2021 | Test     | F      | Hip fracture       | 34     | 2029        | SM         |                         |                          | 0.8400  |             |             |          |
| Ho-Le, T. P | 2017 | Train    | F      | Hip fracture       | 54     | 700         | ANN        | 5-fold cross validation |                          |         | 0.8890      | 0.8610      | 0.8630   |
| Ho-Le, T. P | 2017 | Train    | F      | Hip fracture       | 54     | 700         | LR         | 5-fold cross validation |                          |         | 0.9070      | 0.8640      | 0.8670   |
| Ho-Le, T. P | 2017 | Train    | F      | Hip fracture       | 54     | 700         | KNN        | 5-fold cross validation |                          |         | 1.0000      | 0.8330      | 0.8460   |
| Ho-Le, T. P | 2017 | Train    | F      | Hip fracture       | 54     | 700         | SVM        | 5-fold cross validation |                          |         | 0.9240      | 0.9690      | 0.9660   |
| Ho-Le, T. P | 2017 | Test     | F      | Hip fracture       | 36     | 467         | ANN        | 5-fold cross            |                          |         | 0.8330      | 0.8770      | 0.8730   |

| Author        | Year | Data set | Gender | Fracture site      | Events | Sample size | Model type | Verification method      | Missing value processing | C-index | Sensitivity | Specificity | Accuracy |
|---------------|------|----------|--------|--------------------|--------|-------------|------------|--------------------------|--------------------------|---------|-------------|-------------|----------|
|               |      |          |        |                    |        |             |            | validation               |                          |         |             |             |          |
| Ho-Le, T. P   | 2017 | Test     | F      | Hip fracture       | 36     | 467         | LR         | 5-fold cross validation  |                          |         | 0.7780      | 0.8180      | 0.8150   |
| Ho-Le, T. P   | 2017 | Test     | F      | Hip fracture       | 36     | 467         | KNN        | 5-fold cross validation  |                          |         | 0.8060      | 0.7930      | 0.7940   |
| Ho-Le, T. P   | 2017 | Test     | F      | Hip fracture       | 36     | 467         | SVM        | 5-fold cross validation  |                          |         | 0.8060      | 0.8160      | 0.8150   |
| Henry, M. J   | 2011 | Train    | F      | Multiple fractures | 125    | 600         | LR         |                          |                          | 0.7000  | 0.6420      | 0.6620      |          |
| Galassi, A    | 2020 | Train    | F      | Hip fracture       | 62     | 96          | LR         |                          |                          |         | 0.7033      | 0.7146      | 0.7081   |
| Galassi, A    | 2020 | Train    | F      | Hip fracture       | 62     | 96          | SVM        |                          |                          |         | 0.9367      | 0.6292      | 0.8077   |
| Galassi, A    | 2020 | Train    | F      | Hip fracture       | 62     | 96          | DT         |                          |                          |         | 0.5967      | 0.7446      | 0.6587   |
| Galassi, A    | 2020 | Train    | F      | Hip fracture       | 62     | 96          | RF         |                          |                          |         | 0.8330      | 0.9231      | 0.8710   |
| FitzGerald, G | 2014 | Train    | F      | Multiple fractures | 2638   | 47429       | SM         |                          |                          | 0.6670  |             |             |          |
| Ferizi, U     | 2019 | Train    | F      | Multiple fractures | 32     | 92          | BT         | 23-fold cross validation |                          | 0.6200  | 0.5880      | 0.6670      | 0.6390   |
| Ferizi, U     | 2019 | Train    | F      | Multiple fractures | 32     | 92          | LR         | 23-fold cross validation |                          | 0.6200  | 0.5600      | 0.7010      | 0.6510   |
| Ferizi, U     | 2019 | Train    | F      | Multiple fractures | 32     | 92          | LR         | 23-fold cross validation |                          | 0.6190  | 0.5400      | 0.7010      | 0.6420   |

| Author          | Year | Data set | Gender | Fracture site      | Events | Sample size | Model type        | Verification method      | Missing value processing | C-index | Sensitivity | Specificity | Accuracy |
|-----------------|------|----------|--------|--------------------|--------|-------------|-------------------|--------------------------|--------------------------|---------|-------------|-------------|----------|
| Ferizi, U       | 2019 | Train    | F      | Multiple fractures | 32     | 92          | SVM               | 23-fold cross validation |                          | 0.5910  | 0.4490      | 0.7440      | 0.6410   |
| Ferizi, U       | 2019 | Train    | F      | Multiple fractures | 32     | 92          | kNN               | 23-fold cross validation |                          | 0.5060  | 0.2690      | 0.7420      | 0.5760   |
| Ferizi, U       | 2019 | Train    | F      | Multiple fractures | 32     | 92          | NB                | 23-fold cross validation |                          | 0.5650  | 0.4520      | 0.6790      | 0.6020   |
| Enns-Bray, W. S | 2019 | Train    | F      | Hip fracture       | 95     | 254         | LR                |                          |                          | 0.7270  |             |             |          |
| Engels, A       | 2020 | Train    | M+F    | Hip fracture       | 6115   | 20456       | LR                | 10-fold cross validation |                          | 0.7140  |             |             |          |
| Engels, A       | 2020 | Train    | M+F    | Hip fracture       | 6115   | 20456       | RF                | 10-fold cross validation |                          | 0.6860  |             |             |          |
| Engels, A       | 2020 | Train    | M+F    | Hip fracture       | 6115   | 20456       | SVM               | 10-fold cross validation |                          | 0.6600  |             |             |          |
| Engels, A       | 2020 | Train    | M+F    | Hip fracture       | 6115   | 20456       | BT                | 10-fold cross validation |                          | 0.7110  |             |             |          |
| Engels, A       | 2020 | Train    | M+F    | Hip fracture       | 6115   | 20456       | Ensemble learning | 10-fold cross validation |                          | 0.7220  | 1.0000      |             |          |
| Engels, A       | 2020 | Train    | M+F    | Hip fracture       | 6115   | 20456       | BT                | 10-fold cross validation |                          | 0.7250  |             |             |          |
| Engels, A       | 2020 | Test     | M+F    | Hip fracture       | 1529   | 57618       | LR                | 10-fold cross validation |                          | 0.6950  | 1.0000      |             |          |

| Author            | Year | Data set | Gender | Fracture site      | Events | Sample size | Model type        | Verification method      | Missing value processing | C-index | Sensitivity | Specificity | Accuracy |
|-------------------|------|----------|--------|--------------------|--------|-------------|-------------------|--------------------------|--------------------------|---------|-------------|-------------|----------|
| Engels, A         | 2020 | Test     | M+F    | Hip fracture       | 1529   | 57618       | RF                | 10-fold cross validation |                          | 0.6850  |             |             |          |
| Engels, A         | 2020 | Test     | M+F    | Hip fracture       | 1529   | 57618       | SVM               | 10-fold cross validation |                          | 0.6500  |             |             |          |
| Engels, A         | 2020 | Test     | M+F    | Hip fracture       | 1529   | 57618       | BT                | 10-fold cross validation |                          | 0.7020  |             |             |          |
| Engels, A         | 2020 | Test     | M+F    | Hip fracture       | 1529   | 57618       | Ensemble learning | 10-fold cross validation |                          | 0.6980  |             |             |          |
| Engels, A         | 2020 | Test     | M+F    | Hip fracture       | 1529   | 57618       | BT                | 10-fold cross validation |                          | 0.7030  |             |             |          |
| de Vries, B. C. S | 2021 | Train    | M+F    | Multiple fractures | 805    | 7578        | SM                |                          |                          | 0.6970  |             |             |          |
| de Vries, B. C. S | 2021 | Train    | M+F    | Multiple fractures | 805    | 7578        | ANN               |                          |                          | 0.6700  |             |             |          |
| de Vries, B. C. S | 2021 | Train    | M+F    | Multiple fractures | 805    | 7578        | RF                |                          |                          | 0.6870  |             |             |          |
| de Vries, B. C. S | 2021 | Test     | M+F    | Multiple fractures | 165    | 1770        | SM                |                          |                          | 0.6250  |             |             |          |
| de Vries, B. C. S | 2021 | Test     | M+F    | Multiple fractures | 165    | 1770        | ANN               |                          |                          | 0.5880  |             |             |          |
| de Vries, B. C. S | 2021 | Test     | M+F    | Multiple fractures | 165    | 1770        | RF                |                          |                          | 0.5930  |             |             |          |
| Cheung, E. Y      | 2012 | Train    | F      | Multiple fractures | 106    | 2266        | SM                |                          |                          | 0.7300  | 0.8080      | 0.5170      |          |
| Chanplakorn, P    | 2021 | Train    | F      | Vertebral fracture | 179    | 617         | LR                |                          |                          | 0.6500  | 0.4300      | 0.8600      |          |

| Author            | Year | Data set | Gender | Fracture site      | Events  | Sample size | Model type | Verification method                                 | Missing value processing | C-index | Sensitivity | Specificity | Accuracy |
|-------------------|------|----------|--------|--------------------|---------|-------------|------------|-----------------------------------------------------|--------------------------|---------|-------------|-------------|----------|
| Bredbenner, T. L. | 2014 | Train    | M      | Hip fracture       | 45      | 472         | LR         | 10-fold cross validation<br>5-fold cross validation |                          | 0.9300  |             |             |          |
| Beyaz, S.         | 2020 | Train    | M+F    | Multiple fractures | 235     | 2106        | CNN        |                                                     |                          | 0.8250  | 0.6930      | 0.7770      |          |
| Berry, S. D.      | 2018 | Train    | M      | Hip fracture       | 3541    | 119874      | SM         |                                                     |                          | 0.6922  |             |             |          |
| Berry, S. D.      | 2018 | Train    | F      | Hip fracture       | 11012   | 299794      | SM         |                                                     |                          | 0.7106  |             |             |          |
| Berry, S. D.      | 2018 | Test     | M+F    | Hip fracture       | 28050   | 858636      | SM         |                                                     |                          | 0.6800  |             |             |          |
| Beaudoin, C.      | 2021 | Train    | M+F    | Multiple fractures | 57678   | 307909      | SM         |                                                     |                          | 0.6810  |             |             |          |
| Beaudoin, C.      | 2021 | Test     | M+F    | Multiple fractures | 21809   | 273372      | SM         |                                                     |                          | 0.6790  |             |             |          |
| Baleanu, F.       | 2022 | Train    | F      | Multiple fractures | 410     | 3560        | LR         |                                                     |                          | 0.7300  |             |             |          |
| Almog, Y. A.      | 2020 | Train    | M+F    | Vertebral fracture | 2468694 | 6329986     | ANN        |                                                     |                          | 0.8120  | 0.8120      |             | 0.1920   |
| Almog, Y. A.      | 2020 | Test     | M+F    | Vertebral fracture | 295479  | 3476219     | ANN        |                                                     |                          | 0.6680  | 0.7070      |             | 0.1140   |
| Zagorski, P.      | 2021 | Train    | F      | Hip fracture       | 49      | 389         | LR         |                                                     |                          | 0.8840  | 0.9390      | 0.7120      |          |
| Diez-Perez, A.    | 2007 | Train    | F      | Multiple fractures | 363     | 5201        | SM         |                                                     |                          | 0.6720  |             |             |          |
| Lix, L. M.        | 2018 | Train    | F      | Multiple fractures | 749     | 31999       | LR         |                                                     |                          | 0.7060  |             |             |          |
| Li, Q. J.         | 2021 | Train    | F      | Multiple fractures | 49      | 403         | LR         |                                                     |                          | 0.8820  |             |             |          |
| Li, Q. J.         | 2021 | Test     | F      | Multiple fractures | 17      | 159         | LR         |                                                     |                          | 0.8690  |             |             |          |

| Author             | Year | Data set | Gender | Fracture site      | Events | Sample size | Model type   | Verification method | Missing value processing | C-index | Sensitivity | Specificity | Accuracy |
|--------------------|------|----------|--------|--------------------|--------|-------------|--------------|---------------------|--------------------------|---------|-------------|-------------|----------|
| Lee, S             | 2008 | Train    | F      | Multiple fractures | 47     | 94          | SVM          |                     |                          |         | 0.8500      | 0.4900      |          |
| Jacobs, J. W. G    | 2010 | Train    | M      | Vertebral fracture | 58     | 109         | LR           |                     |                          | 0.5100  |             |             |          |
| Jacobs, J. W. G    | 2010 | Train    | F      | Vertebral fracture | 98     | 205         | LR           |                     |                          | 0.7400  | 0.6700      | 0.7100      |          |
| Eller-Vainicher, C | 2011 | Train    | F      | Vertebral fracture | 33     | 372         | LR           |                     |                          | 0.8230  | 0.3730      | 0.9030      | 0.6380   |
| Eller-Vainicher, C | 2011 | Train    | F      | Vertebral fracture | 33     | 372         | ANN          |                     |                          | 0.6990  | 0.7480      | 0.8780      | 0.8130   |
| Zhong, B. Y        | 2017 | Train    | M+F    | Vertebral fracture | 33     | 256         | SM           |                     |                          | 0.7800  |             |             |          |
| Zhong, B. Y        | 2017 | Test     | M+F    | Vertebral fracture | 23     | 165         | SM           |                     |                          | 0.7200  |             |             |          |
| Xiao, X            | 2021 | Train    | F      | Hip fracture       | 25     | 699         | SM           |                     |                          | 0.8040  |             |             |          |
| Du, J              | 2022 | Train    | M+F    | Femur fracture     |        | 96          | SVM          |                     |                          |         |             | 0.6250      |          |
| Du, J              | 2022 | Train    | M+F    | Femur fracture     |        | 96          | RF           |                     |                          |         |             | 0.5000      |          |
| Du, J              | 2022 | Train    | M+F    | Femur fracture     |        | 96          | DT           |                     |                          |         |             | 0.5833      |          |
| Du, J              | 2022 | Train    | M+F    | Femur fracture     |        | 96          | Boosted tree |                     |                          |         |             | 0.5000      |          |
| Du, J              | 2022 | Train    | M+F    | Femur fracture     |        | 96          | ANN          |                     |                          |         |             | 0.5833      |          |
| Du, J              | 2022 | Train    | M+F    | Femur fracture     |        | 96          | Boosted tree |                     |                          |         |             | 0.5417      |          |
| Du, J              | 2022 | Test     | M+F    | Femur fracture     |        | 24          | SVM          |                     |                          |         |             |             | 0.9167   |



| Author        | Year | Data set | Gender | Fracture site      | Events | Sample size | Model type   | Verification method      | Missing value processing | C-index | Sensitivity | Specificity | Accuracy |
|---------------|------|----------|--------|--------------------|--------|-------------|--------------|--------------------------|--------------------------|---------|-------------|-------------|----------|
| Du,J          | 2022 | Test     | M+F    | Femur fracture     |        | 24          | RF           |                          |                          |         |             |             | 0.8333   |
| Du,J          | 2022 | Test     | M+F    | Femur fracture     |        | 24          | DT           |                          |                          |         |             |             | 0.9167   |
| Du,J          | 2022 | Test     | M+F    | Femur fracture     |        | 24          | Boosted tree |                          |                          |         |             |             | 0.8750   |
| Du,J          | 2022 | Test     | M+F    | Femur fracture     |        | 24          | ANN          |                          |                          |         |             |             | 0.9583   |
| Du,J          | 2022 | Test     | M+F    | Femur fracture     |        | 24          | Boosted tree |                          |                          |         |             |             | 0.9167   |
| Wang,M        | 2022 | Train    | M+F    | Vertebral fracture | 72     | 7906        | SM           | 10-fold cross validation |                          | 0.820   |             |             |          |
| Dong,Q        | 2022 | Train    | M+F    | Vertebral fracture |        | 3413        | Other DL     |                          |                          | 0.990   | 0.5980      | 0.9990      | 0.9950   |
| Dong,Q        | 2022 | Test     | M+F    | Vertebral fracture |        | 379         | Other DL     |                          |                          | 0.820   | 0.9770      | 0.9510      | 0.9510   |
| Wen,Z         | 2022 | Train    | M+F    | Vertebral fracture | 208    | 220         | LR           |                          |                          | 0.854   | 0.7310      | 0.8460      |          |
| Wen,Z         | 2022 | Test     | M+F    | Vertebral fracture | 50     | 50          | LR           |                          |                          | 0.979   | 0.8942      | 0.9545      |          |
| Pluskiewicz,W | 2023 | Train    | F      | Multiple fractures | 129    | 640         | LR           |                          |                          | 0.660   |             |             |          |
| Kong,X        | 2022 | Train    | M+F    | Multiple fractures | 109    | 1730        | SM           | Bootstrapping            | Mean interpolation       | 0.803   |             |             |          |
| Agarwal,A     | 2023 | Test     | F      | Multiple fractures | 264    | 9716        | SM           |                          |                          | 0.710   |             |             |          |

\*M:Male;F:Female;LR:Logistic Regression;ANN:artificial neural network;SVM:support-vector machine; CNN:convolutional ANN; kNN:k-nearest neighbors; RF:random forests;DT:decision tree;BT:Boosted tree;SM:Survival model;NB:Naive Bayes;DL:deep learning model.

**Table S5** Risk of bias assessment grading of the machine learning predictive modelling studies of osteoporosis populations as per the PROBAST criteria

| Study             | Participants bias | Predictors bias | Outcome bias | Analysis bias | Overall bias rating |
|-------------------|-------------------|-----------------|--------------|---------------|---------------------|
| Wu, Q             | low               | low             | low          | high          | high                |
| Wu, Q             | low               | low             | low          | high          | high                |
| Wu, Q             | low               | low             | low          | high          | high                |
| Wu, Q             | low               | low             | low          | high          | high                |
| Villamor, E       | high              | unclear         | unclear      | high          | high                |
| Villamor, E       | high              | unclear         | unclear      | high          | high                |
| Villamor, E       | high              | unclear         | unclear      | high          | high                |
| Villamor, E       | high              | low             | unclear      | high          | high                |
| Van Geel, Tacm    | low               | low             | low          | high          | high                |
| Ulivieri, F. M    | low               | low             | low          | high          | high                |
| Yoda, T           | low               | low             | low          | high          | high                |
| Jiang, X. Z       | low               | low             | low          | high          | high                |
| Schousboe, J. T   | high              | low             | low          | unclear       | high                |
| Sandhu, S. K      | high              | unclear         | unclear      | high          | high                |
| Rubin, K. H       | low               | low             | low          | unclear       | unclear             |
| Pluskiewicz, W    | high              | low             | low          | unclear       | high                |
| Jang, E. J        | low               | low             | low          | high          | high                |
| Barret A. Monchka | high              | low             | low          | unclear       | high                |
| Mehta, S. D       | high              | unclear         | unclear      | high          | high                |
| Langsetmo, L      | low               | low             | low          | unclear       | unclear             |
| Ioannidis, G      | high              | low             | low          | unclear       | high                |
| K. K. Nishiyama   | low               | low             | low          | high          | high                |

|               |      |         |         |         |         |
|---------------|------|---------|---------|---------|---------|
| Kruse, C      | low  | low     | low     | unclear | unclear |
| Kruse, C      | low  | low     | low     | unclear | unclear |
| Kolanu, N     | high | low     | low     | unclear | high    |
| Kim, H. Y     | low  | low     | low     | unclear | unclear |
| Hsieh, C. I   | low  | low     | low     | unclear | unclear |
| Hong, N       | low  | low     | low     | unclear | unclear |
| Hong, N       | low  | low     | low     | unclear | unclear |
| Hong, N       | low  | low     | low     | unclear | unclear |
| Hong, N       | low  | low     | low     | unclear | unclear |
| Hong, N       | low  | low     | low     | unclear | unclear |
| Ho-Le, T. P   | low  | low     | low     | high    | high    |
| Ho-Le, T. P   | low  | low     | low     | high    | high    |
| Ho-Le, T. P   | low  | low     | low     | high    | high    |
| Ho-Le, T. P   | low  | low     | low     | high    | high    |
| Henry, M. J   | low  | low     | low     | unclear | unclear |
| Galassi, A    | low  | low     | low     | high    | high    |
| Galassi, A    | low  | low     | low     | high    | high    |
| Galassi, A    | low  | low     | low     | high    | high    |
| Galassi, A    | low  | low     | low     | high    | high    |
| FitzGerald, G | low  | low     | low     | unclear | unclear |
| Ferizi, U     | high | unclear | unclear | high    | high    |
| Ferizi, U     | high | unclear | unclear | high    | high    |
| Ferizi, U     | high | unclear | unclear | high    | high    |
| Ferizi, U     | high | unclear | unclear | high    | high    |
| Ferizi, U     | high | unclear | unclear | high    | high    |
| Ferizi, U     | high | unclear | unclear | high    | high    |

|                    |      |         |         |         |         |
|--------------------|------|---------|---------|---------|---------|
| Enns-Bray, W. S    | high | low     | low     | high    | high    |
| Engels, A          | low  | low     | low     | unclear | unclear |
| Engels, A          | low  | low     | low     | unclear | unclear |
| Engels, A          | low  | low     | low     | unclear | unclear |
| Engels, A          | low  | low     | low     | unclear | unclear |
| Engels, A          | low  | low     | low     | unclear | unclear |
| Engels, A          | low  | low     | low     | unclear | unclear |
| de Vries, B. C. S  | high | low     | low     | unclear | high    |
| de Vries, B. C. S  | high | low     | low     | unclear | high    |
| de Vries, B. C. S  | high | low     | low     | unclear | high    |
| Cheung, E. Y       | low  | low     | low     | unclear | unclear |
| Chanplakorn, P     | high | low     | low     | unclear | high    |
| Bredbenner, T. L   | high | unclear | unclear | high    | high    |
| Beyaz, S           | high | low     | low     | unclear | high    |
| Berry, S. D        | low  | low     | low     | unclear | unclear |
| Beaudoin, C        | high | low     | low     | unclear | high    |
| Baleanu, F         | low  | low     | low     | unclear | unclear |
| Baleanu, F         | low  | low     | low     | unclear | unclear |
| Almog, Y. A        | high | low     | low     | unclear | unclear |
| Zagorski, P        | low  | low     | low     | high    | high    |
| Diez-Perez, A      | low  | low     | low     | unclear | unclear |
| Lix, L. M          | low  | low     | low     | unclear | unclear |
| Li, Q. J           | high | low     | low     | high    | high    |
| Lee, S             | high | unclear | low     | high    | high    |
| Jacobs, J. W. G    | low  | low     | low     | unclear | unclear |
| Eller-Vainicher, C | low  | low     | low     | high    | high    |

|                    |      |     |     |         |         |
|--------------------|------|-----|-----|---------|---------|
| Eller-Vainicher, C | low  | low | low | high    | high    |
| Zhong, B. Y        | high | low | low | high    | high    |
| Xiao, X            | low  | low | low | high    | high    |
| Du,J               | low  | low | low | high    | high    |
| Du,J               | low  | low | low | high    | high    |
| Du,J               | low  | low | low | high    | high    |
| Du,J               | low  | low | low | high    | high    |
| Du,J               | low  | low | low | high    | high    |
| Du,J               | low  | low | low | high    | high    |
| Wang,M             | high | low | low | high    | high    |
| Dong,Q             | low  | low | low | unclear | unclear |
| Wen,Z              | high | low | low | high    | high    |
| Pluskiewicz,W      | low  | low | low | high    | high    |
| Kong,X             | high | low | low | high    | high    |
| Agarwal,A          | low  | low | low | unclear | unclear |

\*When a single study included multiple models, risk of bias concerns were assessed for each model.

**Fig.S1** Forest plots for subgroup analysis of C-index statistics by fracture site and machine learning type in training set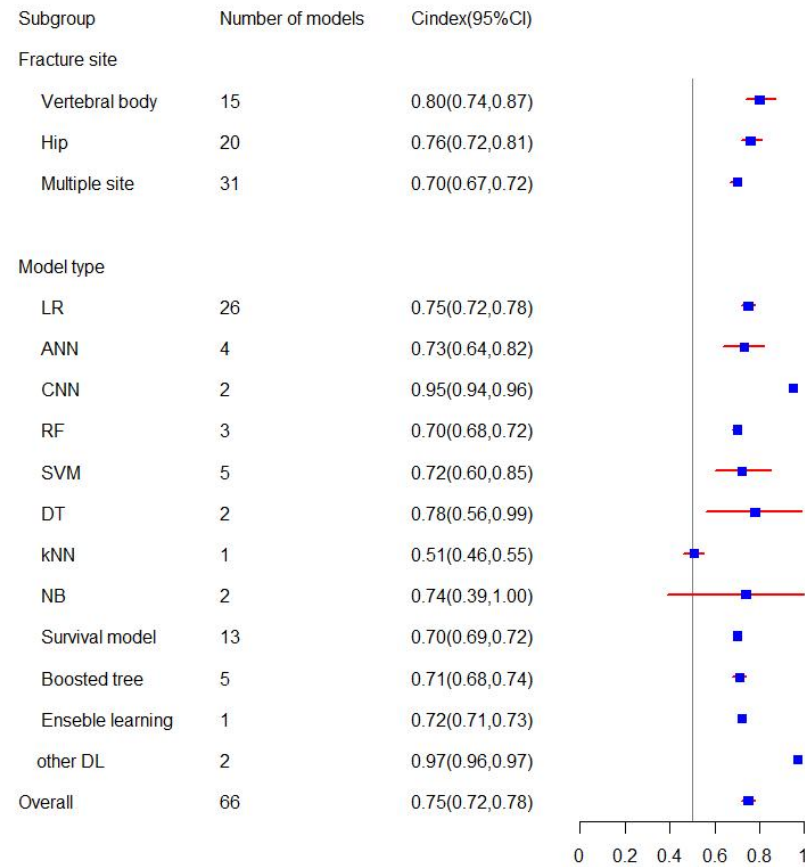

**Fig.S2** Forest plots for subgroup analysis of C-index statistics by fracture site and machine learning type in validation set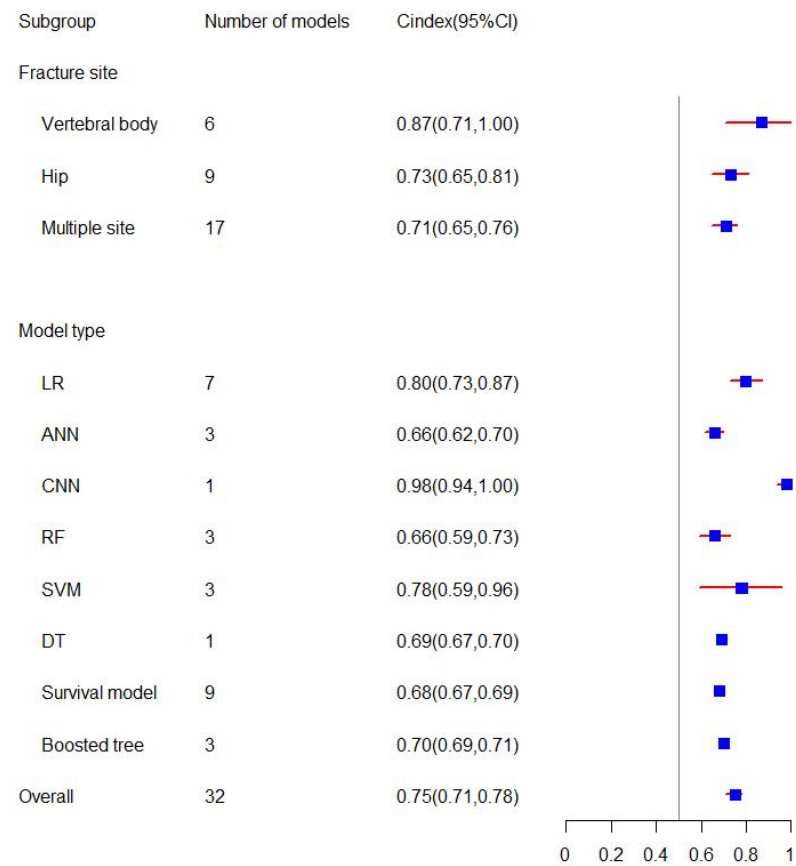

**Fig.S3** Sensitivity analysis of multiple fracture model in training set

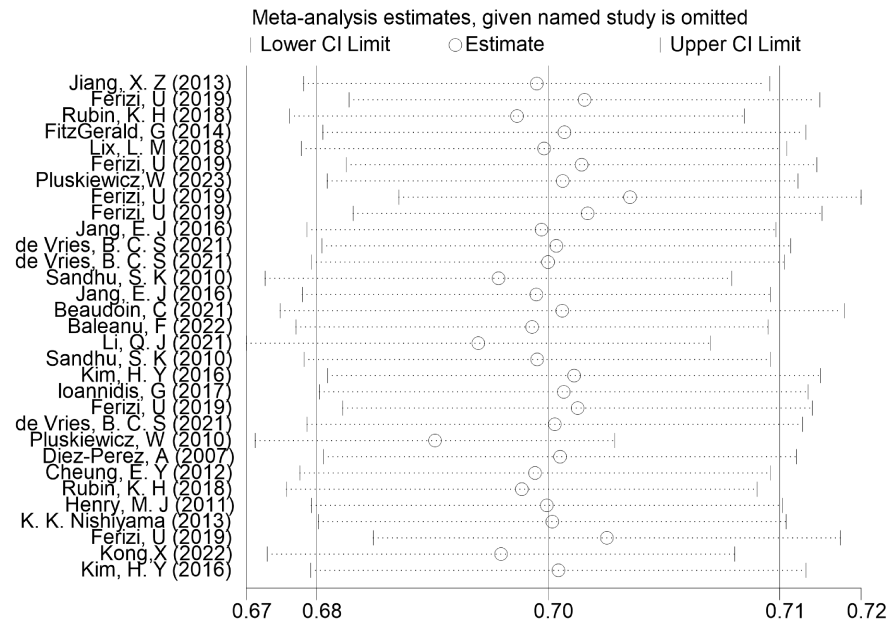



**Fig.S4** Sensitivity analysis of vertebral fracture model in training set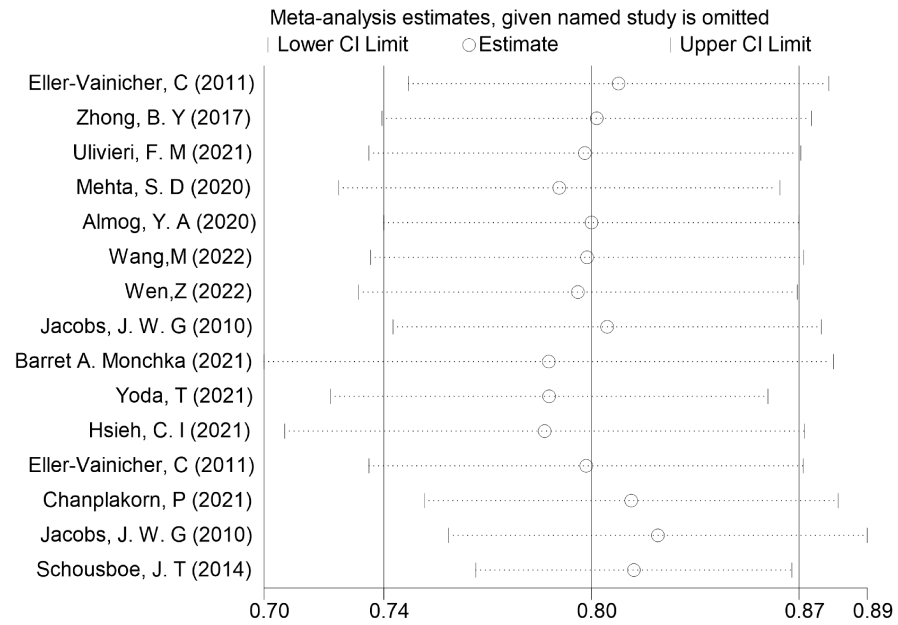



**Fig.S6** Sensitivity analysis of multiple fracture model in validation set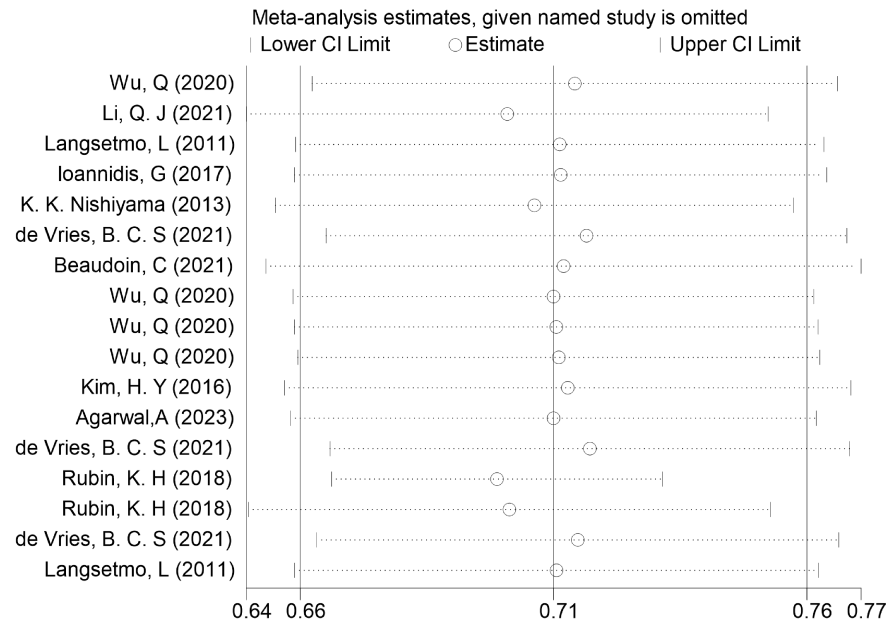

**Fig.S7** Sensitivity analysis of vertebral fracture model in validation set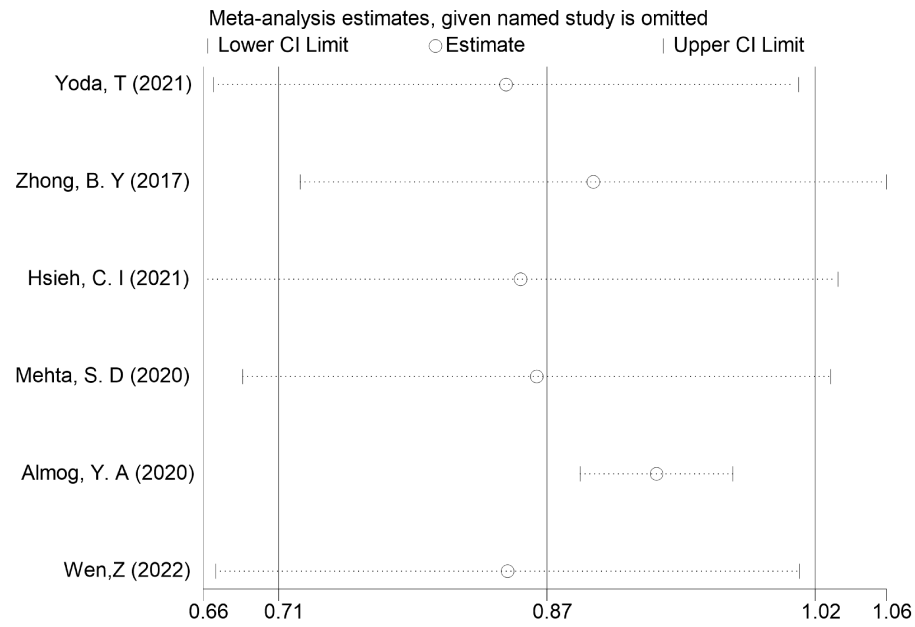

**Fig.S8** Sensitivity analysis of hip fracture model in validation set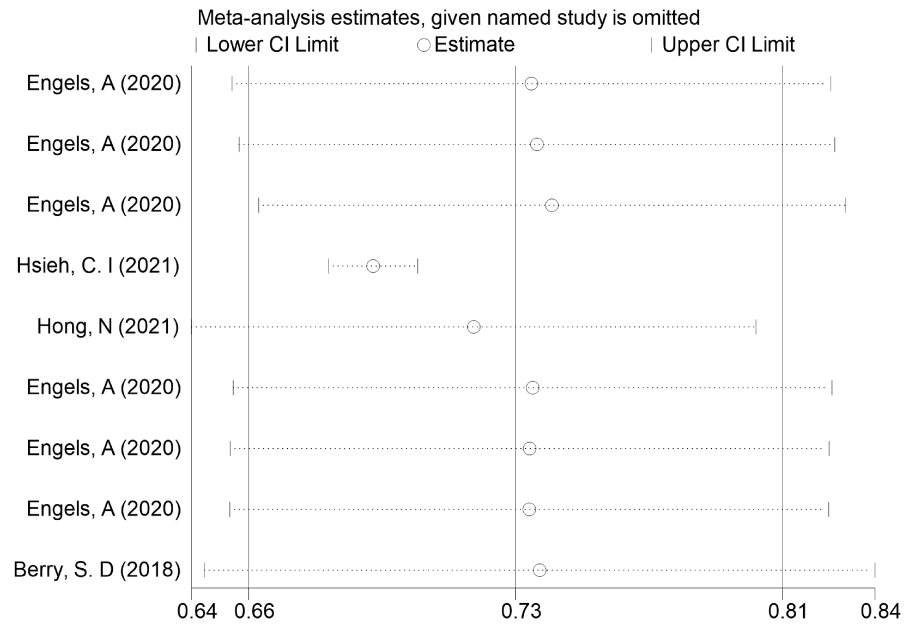

Supplement: bmjopen-2022-071430supp001.pdf [file bmjopen-2022-071430supp001.pdf]
